# Supplementary material for: Prediction of cardiovascular disease risk in patients with psoriasis in northern China
Source: Research Square preprint supplement (doi:10.21203/rs.3.rs-1490270/v2), 2022-05-02
Supplement: Supplementary file 1 [file 10d67971f3f13e2140065690.xlsx]

## Sheet: Sheet1
编号	姓名	性别	年龄	体重	身高m	BMI	收缩压	高血压病	吸烟史	酗酒史	CVD	高血压治过吗	糖尿病	CHOL	TG	HDL(mmol/L)	LDL(mmol/L)	血脂异常	VLDL(mmol/L)	Apoa(g/L)	Apob(g/L)	Lpa(mg/L)
1	王乃国	男	65	65	1.7	22.49	177	y	n	n	n	n	n	2.67	0.67	1.28	1.13	n	0.13	1.6	0.3	126.3
2	肖桂萍	男	52	84	1.6	32.81	103	n	n	n	n	n	n	2.8	0.61	1.65	1.4	n	0.12	1.59	0.36	352.9
3	王贵臣	男	67	91	1.78	28.72	127	n	n	n	n	n	n	3.18	0.7	1.62	1.94	n	0.14	2.39	0.59	321
4	佟亚杰	男	83	58	1.53	24.78	133	n	n	n	n	n	n	3.33	0.67	0.89	1.97	y	0.13	2.49	0.58	192.1
5	李安淇	女	45	58	1.69	20.31	110	n	n	n	n	n	y	2.73	1.38	1.22	1.24	n	0.28	1.71	0.5	45.37
6	赵晓东	男	48	60	1.78	18.94	133	n	y	y	n	n	n	3.23	0.58	1.23	1.61	n	0.12	1.47	0.49	150.23
7	王明硕	男	17	65	1.85	18.99	103	n	n	n	n	n	n	2.95	0.98	1.13	1.81	n	0.2	1.47	0.49	77.5
8	杨晨晨	女	33	53	1.63	19.95	127	n	n	n	n	n	n	4.07	1.04	1.48	2.46	n	0.21	2.97	0.79	183
9	时术平	男	36	65	1.6	25.39	115	n	n	n	n	n	n	3.36	0.77	1.33	2.04	n	0.15	1.62	0.41	23
10	薛春林	男	37	75	1.66	27.22	137	n	n	n	n	n	n	2.59	0.67	1.07	1.64	n	0.13	1.29	0.34	39.8
11	李方鑫	男	38	97	1.78	30.61	140	y	n	n	n	n	n	4.01	1.74	0.96	2.49	y	0.35	2.45	0.77	44.3
12	石宪平	男	43	78	1.7	26.99	132	y	n	n	n	n	n	2.14	0.54	0.98	1.07	y	0.11	1.1	0.31	171.9
13	张晓萍	女	47	59	1.65	21.67	135	n	n	n	n	n	n	2.71	0.67	0.86	1.81	y	0.13	1.47	0.49	293.6
14	唐玉艳	女	49	69	1.7	23.88	136	n	n	n	n	n	n	3.54	0.89	1.07	1.94	n	0.18	1.93	0.57	128.5
15	王春	男	52	73	1.7	25.26	117	n	n	n	n	n	n	3.31	0.71	1.61	1.68	n	0.14	1.66	0.48	136.2
16	郭银平	女	16	40	1.7	13.84	81	n	n	n	n	n	n	2.73	0.51	1.18	1.13	n	0.1	1.23	0.38	112.3
17	高峰	男	24	55	1.68	19.49	133	n	n	n	n	n	n	2.51	0.72	0.86	1.2	y	0.14	1.29	0.42	101
18	朱晓陆	男	24	92	1.72	31.1	133	y	n	n	n	n	n	3.85	1.05	1.11	2.31	n	0.21	2.53	0.75	26.3
19	杨雨桐	女	24	50	1.78	15.78	99	n	n	n	n	n	n	4.06	0.95	2.19	1.99	n	0.19	1.11	0.3	101.1
20	田春哲	女	26	53	1.63	19.95	113	n	n	n	n	n	n	2.96	0.59	1.8	2.04	n	0.12	1.41	0.43	26.5
21	吕蕊	女	30	57	1.65	20.94	110	n	n	n	n	n	n	3.07	0.32	1.36	1.3	n	0.06	1.28	0.39	253.5
22	张春礼	男	76	85	1.8	26.23	149	y	n	n	n	n	n	2.67	1.16	0.68	1.54	y	0.23	1.46	0.48	192
23	王举清	男	76	60	1.68	21.26	133	n	n	n	n	n	n	2.76	0.89	1.34	1.48	n	0.18	1.16	0.37	164
24	李传本	男	79	68	1.65	24.98	122	n	n	n	n	n	n	2.1	0.97	0.8	1.37	y	0.19	1.26	0.42	88.4
25	梁玉俭	男	80	66	1.8	20.37	128	n	n	n	n	n	n	2.36	0.46	0.7	1.24	y	0.09	1.43	0.42	159.85
26	郭魁英	男	84	65	1.75	21.22	121	n	y	n	n	n	n	4.17	2.51	0.63	2.64	y	0.5	2.7	0.85	29
27	陈华	女	41	60	1.63	22.58	138	y	n	y	n	n	y	2.46	1.44	1.21	1.23	n	0.29	1.52	0.53	66.87
28	付红梅	女	42	54	1.55	22.48	136	y	y	n	n	n	y	2.89	0.72	1.23	1.68	n	0.14	1.73	0.74	37.6
29	王艳	女	50	50	1.55	20.81	115	n	n	n	n	n	y	4.45	1.25	1.43	2.63	n	0.25	1.63	0.79	275.39
30	孙逊	男	56	77	1.62	29.34	123	y	n	n	n	n	n	3.04	0.55	1.02	1.86	y	0.11	1.21	0.5	83.02
31	张春范	女	60	63	1.66	22.86	123	y	n	n	n	n	y	3.1	0.75	1.23	1.7	n	0.15	1.43	0.64	291.71
32	赵洁	女	25	70	1.68	24.8	117	n	n	n	n	n	y	3.38	0.5	1.26	1.65	n	0.1	1.33	0.57	136.99
33	王志军	男	64	75	1.69	26.26	140	y	n	n	n	n	y	2.47	0.78	1.23	0.97	n	0.16	1.12	0.43	68.25
34	高云山	男	72	75	1.7	25.95	135	n	n	n	n	n	y	3.51	1.85	0.66	2.1	y	0.37	1.52	0.73	272.3
35	左宝起	男	75	86	1.77	27.45	147	y	y	n	n	n	y	3.13	1.54	0.95	1.63	y	0.31	1.37	0.61	22.8
36	张辅礼	男	76	90	1.74	29.73	128	n	n	n	y	n	y	3.37	1.56	0.99	2.21	y	0.31	1.32	0.64	272
37	杨松山	男	77	89	1.77	28.41	152	y	n	n	n	n	y	3.73	1.66	0.98	2.64	y	0.33	2.3	0.83	41.6
38	刘雨彤	女	17	66	1.57	26.78	120	n	n	n	n	n	n	2.08	0.73	0.98	1.22	y	0.15	0.7	0.27	544.7
39	窦广敦	男	17	57	1.78	17.99	117	n	n	n	n	n	n	2.83	0.98	0.87	1.74	y	0.2	1.17	0.52	134.7
40	贾洋	男	18	73	1.78	23.04	118	n	n	n	n	n	n	3.96	0.77	1.13	2.42	n	0.15	1.98	0.67	234.2
41	王淼森	男	18	63	1.08	54.01	118	n	n	n	n	n	n	3.42	0.83	1.25	1.9	n	0.17	1.42	0.67	784.1
42	武帅	男	18	56	1.73	18.71	122	n	y	n	n	n	n	2.64	0.67	1.02	1.61	y	0.13	1.25	0.5	777
43	胡国凤	女	19	40	1.58	16.02	129	n	n	n	n	n	n	3.94	0.84	1.3	2.14	n	0.17	1.51	0.61	662.7
44	周煜婧	女	19	50	1.65	18.37	106	n	n	n	n	n	n	3.23	0.81	1.26	1.89	n	0.16	1.14	0.48	123.9
45	赵力那	男	19	52	1.63	19.57	105	n	n	n	n	n	n	4.17	0.45	1.31	2.41	n	0.09	1.16	0.56	242.7
46	何海霞	女	21	59	1.61	22.76	115	n	n	n	n	n	n	3.7	0.38	1.35	1.96	n	0.08	1.09	0.54	20.8
47	刘梦轻	男	21	62	1.76	20.02	120	n	n	n	n	n	n	3.46	0.59	1.12	2.54	n	0.12	1.36	0.66	175.2
48	孟繁星	男	32	82.5	1.8	25.46	122	n	y	n	n	n	n	2.31	0.44	1.5	1.36	n	0.09	1.43	0.48	895.9
49	贾欠欠	女	32	56	1.6	21.88	119	n	n	n	n	n	n	5.16	1.02	1.85	3.22	n	0.2	1.9	0.85	246.6
50	徐红艳	女	32	59	1.58	23.63	121	n	n	n	n	n	n	4.06	1.14	1.41	2.38	n	0.23	1.37	0.59	118.8
51	王春磊	女	33	75	1.7	25.95	108	n	n	n	n	n	n	3.09	0.48	1.17	1.51	n	0.1	1.14	0.55	82
52	高春亮	男	33	75	1.69	26.26	130	n	n	n	n	n	n	2.76	0.49	1.22	1.41	n	0.1	1.25	0.44	7.2
53	李美玲	女	33	40	1.6	15.63	105	n	n	n	n	n	n	3.67	0.8	1.32	2.28	n	0.16	1.64	0.56	109.9
54	王雷	男	33	60	1.62	22.86	121	n	n	n	n	n	n	2.88	1.08	1.07	1.69	n	0.22	1.05	0.52	64.4
55	郭景辉	男	33	68	1.7	23.53	117	n	n	n	n	n	n	4.12	1.01	1.21	2.33	n	0.2	1.61	0.71	30.4
56	罗洋	女	34	54	1.72	18.25	112	n	n	n	n	n	n	4.06	0.68	1.21	2.36	n	0.14	1.58	0.77	161.8
57	那晶	女	34	55	1.68	19.49	118	n	n	n	n	n	n	2.92	0.75	1.21	1.58	n	0.15	1.17	0.57	517.7
58	张学广	男	34	73	1.76	23.57	132	y	n	y	n	n	n	3.64	0.82	1.06	2.32	n	0.16	1.72	0.72	123.3
59	杨东旭	男	34	80	1.78	25.25	130	y	n	n	n	n	n	3.78	1.2	1.26	1.97	n	0.24	1.67	0.78	61.9
60	杨明	男	34	160	1.82	48.3	121	n	n	n	n	n	n	3.92	0.53	1.52	2.14	n	0.11	1.23	0.56	89.4
61	柳桂玲	女	34	51	1.66	18.51	106	n	n	n	n	n	n	5.2	1.35	1.52	3.16	n	0.27	2.04	0.87	144
62	赵萍	女	34	55	1.46	25.8	134	n	n	n	n	n	n	2.69	0.62	0.81	1.48	y	0.12	0.87	0.43	80.5
63	柏杨	女	36	62.5	1.62	23.81	114	n	n	n	n	n	n	3.04	2.32	0.85	1.64	y	0.46	1.31	0.57	40.4
64	胡立梅	女	36	63	1.68	22.32	127	n	n	n	n	n	n	3.23	0.4	1.26	1.73	n	0.08	1.4	0.51	22.6
65	步雪	女	36	63	1.66	22.86	107	n	n	n	n	n	n	4.16	0.62	1.69	2.53	n	0.12	1.13	0.55	175.5
66	王金荣	女	36	52	1.65	19.1	108	n	n	n	n	n	n	4.6	0.82	1.63	2.88	n	0.16	1.64	0.73	164.6
67	刘荣海	男	36	52	1.65	19.1	136	n	n	n	n	n	n	4.69	0.93	1.44	2.85	n	0.19	1.73	0.77	153.8
68	贾士海	男	37	72	1.74	23.78	123	n	y	n	n	n	n	4.79	1.17	1.27	3.26	n	0.23	2.05	0.93	423.4
69	包锴彤	女	38	65	1.68	23.03	119	n	n	n	n	n	n	5.2	0.67	1.5	3.33	n	0.13	1.95	0.94	54.9
70	韩超	男	38	94	1.8	29.01	158	n	n	n	n	n	n	4.14	0.6	1.34	2.56	n	0.12	1.82	0.71	269.1
71	柳丽华	男	40	94	1.58	37.65	110	n	n	n	n	n	n	3.37	1.02	1.35	1.69	n	0.2	1.32	0.53	184.3
72	马小东	男	40	90	1.8	27.78	144	n	y	n	n	n	n	3.21	0.74	1.32	1.9	n	0.15	1.79	0.61	49.9
73	赵欣	女	40	51	1.63	19.2	125	n	n	n	n	n	n	4.28	0.79	1.75	2.6	n	0.16	1.3	0.61	60.1
74	李凤霞	女	41	65	1.64	24.17	128	n	n	n	n	n	n	4.78	1.38	1.11	3.13	n	0.51	2.13	0.95	41.8
75	张国华	男	41	71	1.6	27.73	120	n	n	n	n	n	n	4.71	1.13	1.12	3.53	n	0.23	1.94	0.87	360.3
76	窦春花	女	41	50	1.6	19.53	129	n	n	n	n	n	n	3.62	0.72	1.19	2.3	n	0.14	1.33	0.58	81.1
77	李艳芳	女	43	60	1.56	24.65	116	n	y	n	n	n	n	4.29	1.02	0.84	2.57	y	0.2	1.93	0.89	149.2
78	孙正福	男	43	67	1.6	26.17	119	n	n	n	n	n	n	3.43	1	0.91	2.18	y	0.2	1.36	0.67	88
79	张严	女	44	60	1.61	23.15	95	n	n	n	n	n	n	2.71	1.09	0.97	1.7	y	0.22	1.15	0.54	28.3
80	刘忠有	男	44	88	1.78	27.77	130	n	n	n	n	n	n	2.6	0.57	0.83	1.62	y	0.11	1.07	0.5	56.4
81	徐鑫泽	男	44	50	1.59	19.78	99	n	n	n	n	n	n	4.43	1.25	1.11	2.79	n	0.25	1.7	0.78	88.3
82	候殿艳	女	45	53	1.6	20.7	111	n	n	n	n	n	n	4.57	1.7	1.04	2.44	n	0.34	1.58	0.69	349
83	耿进花	男	45	59	1.57	23.94	122	n	n	n	n	n	n	4	0.84	1.22	2.7	n	0.17	1.37	0.56	58
84	黄桂敏	女	47	60	1.56	24.65	154	y	n	n	y	n	n	3.71	1.26	1.16	2.01	n	0.25	1.57	0.73	479.9
85	田洪珍	男	47	64	1.72	21.63	140	y	n	n	n	n	n	2.76	0.58	1.14	1.62	n	0.12	1.45	0.6	252.7
86	鲍玉凤	女	47	61	1.6	23.83	124	n	n	n	n	n	n	2.55	1.39	0.67	1.72	y	0.28	1.02	0.44	361.7
87	范化生	男	48	73	1.72	24.68	118	n	n	n	n	n	n	3.38	0.62	1.24	1.88	n	0.12	1.46	0.58	244
88	张军红	女	48	60	1.58	24.03	122	n	n	n	n	n	n	3.49	0.9	1.54	2	n	0.18	1.35	0.58	332.9
89	王秀荣	女	49	58	1.64	21.56	144	n	n	n	n	n	n	3.87	0.97	1.32	2.11	n	0.19	1.41	0.65	87.7
90	王华	女	49	65	1.7	22.49	120	n	n	n	n	n	n	4.1	0.77	1.67	2.24	n	0.15	1.36	0.56	456.3
91	汤华平	男	49	50	1.63	18.82	109	n	n	n	n	n	n	3.65	0.77	1.47	1.85	n	0.15	1.32	0.59	340.5
92	关少华	女	49	65	1.55	27.06	117	n	n	n	n	n	n	3.97	0.79	1.58	2.45	n	0.16	1.4	0.7	223.2
93	王增兰	女	50	62	1.58	24.84	126	n	n	n	n	n	n	2.99	0.82	0.76	1.77	y	0.16	1.33	0.66	255.4
94	关士全	男	50	56	1.65	20.57	129	n	n	n	n	n	n	4.37	2.85	1.1	2.68	y	0.57	1.4	0.65	228.9
95	崔立谆	女	51	65	1.7	22.49	106	n	n	n	n	n	n	5.11	0.78	2.02	3.2	n	0.16	1.66	0.76	512.5
96	郭章英	女	51	55	1.6	21.48	136	n	n	n	n	n	n	5.09	0.63	1.89	2.98	n	0.13	1.77	0.75	138.1
97	陈秀杰	女	51	60	1.65	22.04	134	n	n	n	n	n	n	4.27	1.37	1.37	2.57	n	0.27	1.55	0.75	83
98	付春玲	女	51	57	1.58	22.83	126	n	n	n	n	n	n	3.58	1.03	1.44	2.07	n	0.21	1.34	0.54	137.3
99	郑欣	女	52	66	1.62	25.15	115	n	n	n	n	n	n	3.23	1.04	0.88	2.37	y	0.21	1.67	0.71	9.6
100	栗华	男	52	71	1.58	28.44	153	y	n	n	y	n	n	3.49	1.17	0.96	2.13	y	0.23	1.7	0.79	110.9
101	曹凤英	男	52	57	1.5	25.33	124	n	n	n	n	n	n	3.13	0.74	1.06	1.96	n	0.15	1.74	0.62	450.7
102	崔景芬	女	52	63	1.58	25.24	108	n	n	n	n	n	n	3.48	0.82	0.98	2.15	y	0.16	1.7	0.8	40.3
103	李春凤	女	52	45	1.58	18.03	135	n	n	n	n	n	n	4.01	0.87	1.37	2.56	n	0.17	1.53	0.72	90.7
104	彭秉海	男	52	70	1.72	23.66	139	y	n	n	n	n	n	2.52	0.85	0.85	1.57	y	0.17	1.65	0.58	41.5
105	许长福	男	52	66	1.7	22.84	100	n	n	n	n	n	n	4.32	1.34	1.03	2.65	y	0.27	1.76	0.84	204.1
106	汤立国	男	52	59	1.65	21.67	119	n	y	y	n	n	n	2.48	0.91	0.81	1.56	y	0.18	1.45	0.54	54.9
107	李振杰	男	53	70	1.78	22.09	120	n	n	n	n	n	n	3.54	0.64	1.23	1.81	n	0.13	1.46	0.73	221.8
108	于君	男	53	75	1.68	26.57	152	y	n	n	n	n	n	3.73	0.5	1.18	2.12	n	0.1	1.45	0.67	176.1
109	邢玉华	女	53	55	1.6	21.48	115	n	n	n	n	n	n	3.58	1.02	0.81	2.21	y	0.2	1.74	0.75	262.6
110	李会桐	男	53	65	1.75	21.22	111	y	n	n	n	n	n	2.82	0.98	0.94	1.76	y	0.2	1.38	0.64	226.3
111	李秀兰	女	54	64	1.63	24.09	118	n	y	n	n	n	n	3.89	1.2	1.24	2.59	n	0.24	1.71	0.8	119.5
112	张忠和	男	55	60	1.7	20.76	112	n	n	n	n	n	n	3.36	0.69	1.19	2.09	n	0.14	1.38	0.62	97.4
113	姜常洲	男	58	70	1.7	24.22	104	n	n	n	n	n	n	3.29	2.1	1.21	1.92	n	0.42	1.47	0.72	8.1
114	张进富	男	58	79	1.7	27.34	137	n	n	n	n	n	n	3.6	0.87	1.53	2.1	n	0.17	1.29	0.57	37.2
115	吕超英	男	58	60	1.7	20.76	107	n	n	n	n	n	n	2.67	0.84	1.3	1.51	n	0.17	0.99	0.41	127.8
116	赵景和	男	59	75	1.84	22.15	115	n	n	n	n	n	n	4.15	0.84	1.12	2.54	n	0.17	1.99	0.73	25.5
117	邹德云	男	59	52	1.67	18.65	87	n	n	n	n	n	n	2.9	0.8	1.03	1.86	y	0.16	1.13	0.54	141.2
118	孙金哲	男	16	72	1.77	22.98	151	n	n	n	n	n	n	2.96	0.63	1.21	1.93	n	0.13	1.4	0.52	16.3
119	李晓茹	女	16	58	1.7	20.07	1.35	n	n	n	n	n	n	2.5	0.42	1.28	1.38	n	0.08	1.01	0.38	144.3
120	周璐璐	女	16	57	1.64	21.19	134	n	n	n	n	n	n	3.86	0.52	1.85	2.2	n	0.1	1.56	0.58	11.8
121	李禧炎	男	16	76	1.88	21.5	95	n	n	n	n	n	n	1.77	0.37	0.85	0.93	y	0.07	0.57	0.27	76.2
122	张弛	男	16	77	1.75	25.14	135	n	n	n	n	n	n	3.12	0.37	1.14	1.86	n	0.07	1.32	0.56	104.5
123	张博	男	16	50	1.78	15.78	82	n	n	n	n	n	n	2.92	0.43	1.01	1.76	n	0.09	1.09	0.53	242.2
124	潘婷	女	22	55	1.63	20.7	129	n	n	y	n	n	n	2.97	0.42	1.25	1.19	n	0.08	1.31	0.49	157.9
125	苏月	女	23	80	1.63	30.11	142	y	n	n	n	n	n	3.81	0.8	1.29	2.36	n	0.16	1.56	0.73	97
126	毕长卿	女	23	56	1.56	23.01	104	n	n	n	n	n	n	3.42	0.82	1.15	2.22	n	0.16	1.4	0.56	15.4
127	陈莹	女	23	58	1.64	21.56	128	n	n	n	n	n	n	2.94	0.72	1.22	1.64	n	0.14	1.37	0.6	49.2
128	张显文	女	23	57	1.65	20.94	101	n	n	n	n	n	n	3.31	0.74	1.14	2.01	n	0.15	1.18	0.55	70.9
129	屈娜	女	23	62	1.72	20.96	121	n	n	n	n	n	n	3.98	0.48	1.51	1.99	n	0.1	1.27	0.59	174.1
130	王湛博	男	23	95	1.84	28.06	140	n	n	n	n	n	n	3.02	0.73	1.27	1.74	n	0.15	1.34	0.56	101.5
131	田晓宁	男	23	66	1.75	21.55	135	n	n	n	n	n	n	3.34	0.58	1.62	2.02	n	0.12	1.1	0.47	10.2
132	梁倩男	女	24	52	1.66	18.87	109	n	n	n	n	n	n	4.3	0.78	1.81	2.45	n	0.16	1.27	0.59	55.3
133	张桢	女	25	57	1.72	19.27	95	n	n	n	n	n	n	3.56	0.26	1.85	1.23	n	0.05	1	0.45	67.7
134	刘丽娜	男	25	44	1.6	17.19	107	n	n	n	n	n	n	3.22	0.76	1.22	1.95	n	1.6	1.1	0.55	218.5
135	洪云	男	26	53	1.58	21.23	107	n	n	n	n	n	n	3.78	0.72	1.44	2.36	n	0.14	1.03	0.43	107.8
136	王晓京	女	27	48	1.72	16.22	97	n	y	n	n	n	n	3.4	0.69	1.54	1.32	n	0.14	1.28	0.58	51.3
137	念亚凤	女	27	52	1.6	20.31	112	n	n	n	n	n	n	2.94	0.24	1.16	1.53	n	0.05	1.02	0.45	120.8
138	董博	女	28	47	1.62	17.91	116	n	n	n	n	n	n	3.44	0.51	1.45	2.06	n	0.1	1.23	0.52	254.9
139	舒展	女	29	51	1.6	19.92	108	n	n	n	n	n	n	3.13	0.63	1.29	1.89	n	0.13	0.97	0.44	58
140	徐晗	女	30	41	1.57	16.63	93	n	n	n	n	n	n	3.11	1.25	0.88	1.92	y	0.25	1.13	0.56	113.5
141	鞠曼	女	30	58	1.55	24.14	108	n	n	n	n	n	n	2.69	0.77	0.85	1.46	y	0.15	1.35	0.58	161
142	王中佳	女	30	51	1.64	18.96	103	n	n	n	n	n	n	2.55	0.54	1.25	1.61	n	0.11	0.91	0.37	104.7
143	蔡春丽	女	31	60	1.62	22.86	130	n	n	n	n	n	n	4.13	1.04	1.06	2.66	n	0.21	1.54	0.73	407.3
144	张美玲	女	31	70	1.72	23.66	126	n	n	n	n	n	n	3.57	0.82	1.26	2.26	n	0.16	1.34	0.66	257.5
145	姜婷婷	女	31	52	1.7	17.99	119	n	n	n	n	n	n	2.57	0.51	0.93	1.58	y	0.1	1.3	0.45	426.2
146	吴志敏	男	61	70	1.72	23.66	159	n	n	n	y	n	n	3.57	0.76	1.4	2.13	n	0.15	1.42	0.62	255.6
147	姜在志	男	63	65	1.7	22.49	135	y	n	y	n	n	n	4.09	1	1.18	2.48	n	0.2	1.52	0.72	180.3
148	迟惠祥	男	64	65	1.87	18.59	173	y	n	n	y	n	n	3.08	0.82	1.26	1.32	n	0.16	1.19	0.49	213.7
149	谷松立	男	64	71	1.72	24	110	n	n	n	n	n	n	4.03	0.76	1.42	2.64	n	0.15	1.77	0.79	155.2
150	刘大强	男	67	94	1.75	30.69	151	y	n	n	n	n	n	2.86	1.15	1.2	1.56	n	0.23	1.29	0.52	139
151	王利英	女	67	66	1.64	24.54	123	n	n	n	n	n	n	5.02	0.8	1.9	2.27	n	0.16	1.79	0.84	151
152	王云生	男	67	59	1.65	21.67	145	y	n	n	n	n	n	2.72	0.94	0.9	1.7	y	0.19	1.27	0.56	312
153	张德秀	男	68	71	1.72	24	142	y	n	n	n	n	n	3.98	1.24	1.34	2.66	n	0.25	2.49	0.86	58
154	张国香	男	68	62.5	1.6	24.41	178	n	n	n	y	n	n	3.53	2.34	1.04	2.16	y	0.47	1.69	0.7	77
155	陈洪艳	男	68	62	1.64	23.05	98	y	y	y	n	n	n	5.68	2.61	0.91	3.79	y	0.52	2.7	1.23	154
156	朱永滨	男	68	60	1.6	23.44	90	n	n	n	y	n	n	4.36	0.83	1.21	2.47	n	0.17	1.59	0.72	213
157	刘国晶	男	69	70	1.73	23.39	189	y	n	n	y	n	n	4.63	0.86	1.34	3.36	n	0.17	2.33	0.98	171
158	郭世文	男	69	60	1.77	19.15	130	y	n	y	n	n	n	2.56	0.76	1.04	1.4	n	0.15	1.51	0.52	245
159	徐和	男	69	55	1.68	19.49	135	y	n	n	n	n	n	3.71	0.63	1.09	2.27	n	0.13	1.53	0.71	177
160	林宝才	男	69	67	1.65	24.61	108	y	n	y	y	n	n	4.06	1.23	1.11	2.43	n	0.25	1.59	0.73	228
161	苏连春	男	70	66	1.67	23.67	168	n	n	n	y	n	n	3.53	0.67	1.43	2.15	n	0.13	1.46	0.58	303
162	李永生	男	70	75	1.78	23.67	144	n	n	n	n	n	n	3.81	1.67	0.74	2.51	y	0.33	1.64	0.77	243
163	高勇	男	71	65	1.65	23.88	145	n	n	n	n	n	n	4.01	0.77	1.25	2.48	n	0.15	1.52	0.64	276
164	伊忠坤	男	72	60	1.65	22.04	138	y	n	n	n	n	n	3.08	1.19	1.27	1.78	n	0.24	1.19	0.52	280
165	刘忠义	男	73	80	1.8	24.69	161	y	n	n	y	n	n	3.32	1.26	0.79	2.06	y	0.25	1.32	0.58	155
166	王明福	男	73	67	1.7	23.18	118	n	y	n	y	n	n	3.06	1.51	0.84	1.88	y	0.3	1.63	0.58	191
167	丛庆祥	男	75	55	1.7	19.03	114	n	n	y	n	n	n	2.44	0.66	1.24	1.2	n	0.13	1.36	0.56	199
168	张祖泽	男	75	49	1.6	19.14	119	n	n	n	n	n	n	2.96	0.78	1.11	1.67	n	0.16	1.06	0.48	167
169	林槿周	男	78	71	1.73	23.72	178	n	n	n	y	n	n	4.48	0.8	1.26	2.76	n	0.16	2.01	0.75	100
170	孙文祥	男	79	63	1.68	22.32	113	n	y	y	n	n	n	3.27	0.81	0.8	1.78	y	0.16	1.44	0.72	114.72
171	黄子墨	男	79	80	1.77	25.54	91	n	n	n	n	n	n	3.12	1.06	1.5	1.61	n	0.21	1.28	0.44	59.9
172	石庆荣	男	80	72	1.74	23.78	115	n	n	n	n	n	n	4.39	1.03	1.15	2.83	n	0.21	1.88	0.85	195.41
173	刘财	男	81	70	1.7	24.22	119	n	n	n	n	n	n	3.79	1.03	0.76	2.45	y	0.21	1.6	0.79	63.3
174	闫绍文	男	84	66	1.73	22.05	140	y	n	y	n	n	n	3.7	0.62	1.35	2.06	n	0.12	1.69	0.73	333.4
175	吴学民	男	86	65	1.72	21.97	143	y	n	n	n	n	n	3.5	0.52	1.3	2.2	n	0.1	1.77	0.72	258.5
176	褚庆居	男	86	55	1.74	18.17	156	y	y	n	y	n	n	4.12	1.03	1.32	2.64	n	0.21	1.54	0.69	44.93
177	王宝章	男	86	62	1.65	22.77	125	n	n	n	n	n	n	3.13	0.6	1.1	1.87	n	0.12	1.31	0.57	165.9
178	张弓锐	男	34	110	1.8	33.95	140	y	n	n	n	n	n	3.18	1.42	1.01	1.91	y	0.28	0.88	0.62	88.14
179	李春雷	男	35	85	1.65	31.22	144	n	n	n	n	n	n	4.56	2.87	0.95	2.73	y	0.57	0.98	0.98	56.19
180	祁景方	男	36	70	1.72	23.66	134	y	y	n	n	n	n	3.8	3.99	0.49	2.35	y	0.8	1.09	0.94	109.1
181	陈艳茹	女	38	54	1.62	20.58	119	n	n	n	n	n	y	3.36	0.7	1.42	2.04	n	0.14	1.08	0.56	37.08
182	万海	男	40	88	1.8	27.16	123	n	n	n	n	n	n	5.03	1.01	1.33	2.93	n	0.2	1.04	0.86	118.3
183	杨春国	男	42	83	1.7	28.72	134	n	n	n	n	n	n	4.91	1.44	1.74	3.12	n	0.29	1.3	0.91	220.99
184	魏艳辉	男	43	76	1.8	23.46	140	y	n	n	n	n	n	3.17	0.44	1.23	2	n	0.09	1.46	0.74	83.92
185	刘刚	男	43	70	1.8	21.6	129	y	y	y	n	n	n	4.63	1.09	1.07	2.9	n	0.22	1.23	0.88	688.7
186	李秀侠	女	44	51	1.6	19.92	117	n	n	n	n	n	y	5.61	2.03	1.32	4.14	y	0.41	1.3	1.04	703.23
187	芦长秋	男	45	66	1.7	22.84	127	n	y	y	n	n	n	3.06	1.56	1.3	1.46	n	0.31	1.38	0.81	135.84
188	荀红	女	46	78	1.6	30.47	175	y	n	n	y	n	y	4.56	1.56	1.11	3.06	n	0.31	1.3	1.06	8.68
189	赵庆忠	男	47	65	1.64	24.17	117	n	n	n	n	n	n	4.86	1	1.22	3.04	n	0.2	1.31	1.15	14.56
190	杨春兰	女	49	63	1.7	21.8	116	n	n	n	n	n	y	3.61	0.85	1.36	2.16	n	0.17	1.15	0.63	308
191	燕丽伟	女	50	58	1.6	22.66	105	n	n	n	n	n	y	3.64	0.38	1.61	1.61	n	0.08	1.04	0.55	475.82
192	王立华	女	50	52	1.56	21.37	179	y	y	n	y	n	n	4.7	0.83	1.26	2.9	n	0.17	1.11	1.07	222.46
193	李彬	男	50	70	1.75	22.86	88	n	n	n	n	n	n	4.2	0.59	1.73	2.44	n	0.12	1	0.7	1154.9
194	邹亚燕	女	51	60	1.65	22.04	179	y	n	n	n	n	n	3.44	0.84	1.58	1.55	n	0.17	0.84	0.52	54.79
195	胡宝水	男	52	75	1.65	27.55	122	n	n	n	y	n	n	3.32	0.84	0.75	2.14	y	0.17	1.13	0.82	98.93
196	韩会民	男	52	71	1.65	26.08	185	y	y	n	y	n	n	4.11	5.02	0.78	2.19	y	1	0.92	0.74	29.94
197	周建民	男	52	75	1.74	24.77	140	y	n	n	n	n	n	4.88	2.69	0.94	3.12	y	0.54	1.08	0.92	161.3
198	张卫荣	女	52	51	1.5	22.67	135	n	n	n	n	n	y	6.09	2.67	1.26	3.68	y	0.53	1.17	1.1	102.16
199	刘兴印	男	53	71	1.7	24.57	117	n	y	y	n	n	n	4.55	2.14	0.89	2.85	y	0.43	1.14	0.88	1074.2
200	白喜印	男	54	79	1.75	25.8	179	y	y	y	n	n	y	4.54	1.47	1.22	3.2	n	0.29	1.09	1.07	174.35
201	石凤娟	男	54	58	1.62	22.1	150	n	n	n	n	n	n	5.1	1.23	1.15	3.77	n	0.25	1.28	1.27	67.27
202	刘长荣	女	55	70	1.62	26.67	174	y	n	n	y	n	n	3.4	1.15	1.05	1.8	n	0.23	1.17	0.67	64.8
203	郑朝清	男	55	75	1.7	25.95	126	n	n	n	n	n	n	3.63	0.95	1.39	2.33	n	0.19	0.97	0.73	136.35
204	周玉春	男	56	79	1.72	26.7	136	n	n	n	n	n	y	3.8	1.15	1.35	2.47	n	0.23	0.69	0.63	183.53
205	王艺芳	女	57	64	1.64	23.8	142	n	n	n	n	n	y	3.4	2.58	0.84	1.68	y	0.52	1.18	0.68	348.35
206	张玉宝	男	57	65	1.65	23.88	138	n	n	n	n	n	y	4.06	1.29	1.24	2.44	n	0.26	1.07	0.87	154.33
207	孙淑云	女	58	59	1.6	23.05	182	y	n	y	y	n	y	3.29	1.55	1.23	1.84	n	0.31	1.28	0.7	34.7
208	张国成	男	58	80	1.75	26.12	122	y	n	n	n	n	y	3.12	1.72	1.23	1.65	n	0.34	1.09	0.64	96.41
209	郭健	男	58	80	1.67	28.69	132	y	n	n	n	n	y	4.12	1.16	1.08	2.53	n	0.23	0.92	0.8	366.76
210	孙永伟	男	59	88	1.78	27.77	207	y	n	n	n	n	y	2.81	0.99	1.27	1.04	n	0.2	0.71	0.43	34
211	王国元	男	59	71	1.72	24	146	n	y	n	n	n	y	3.98	1.14	1.24	2.75	n	0.23	1.22	0.84	776.66
212	刘长友	男	59	60	1.7	20.76	121	n	n	n	n	n	y	3.78	0.94	0.97	2.39	y	0.19	0.97	0.75	1062.1
213	张文光	男	60	62	1.69	21.71	129	n	y	n	y	n	y	3.76	0.82	0.81	2.37	y	0.16	1.12	0.76	50.81
214	朱曈	女	16	60	1.62	22.86	126	n	y	n	n	n	y	2.76	0.59	1.24	1.05	n	0.12	0.96	0.55	355.16
215	曲世莉	女	16	50	1.62	19.05	95	n	n	n	n	n	y	3.2	0.67	1.28	1.59	n	0.13	1.08	0.66	135.32
216	冯心悦	女	21	48	1.62	18.29	127	n	n	n	n	n	y	3.73	0.58	1.26	2.12	n	0.12	0.66	0.66	10.08
217	白洋	男	26	58.5	1.75	19.1	102	n	n	y	n	n	y	4.42	0.73	1.14	2.89	n	0.15	0.97	0.89	1062.1
218	陈龙	男	31	68	1.72	22.99	98	n	y	y	n	n	y	4.55	1.2	1.11	2.58	n	0.46	1.95	0.98	69.33
219	姜久斌	男	31	65	1.7	22.49	110	n	y	n	n	n	y	4.27	1.77	1.06	2.51	n	0.35	1.16	0.97	131.84
220	臧焕停	男	61	75	1.7	25.95	153	y	y	n	n	n	y	3	1.05	1.62	1.84	n	0.21	0.82	0.67	359.37
221	苏立东	男	62	77.5	1.72	26.2	125	n	y	n	n	n	y	4.37	0.9	1	2.95	y	0.18	1.2	0.96	169.02
222	牛桂香	女	62	70	1.58	28.04	150	y	n	n	n	n	y	5.01	0.7	1.48	3.23	n	0.14	1.13	0.89	88
223	闫自金	男	63	52	1.6	20.31	114	n	n	y	n	n	y	3.73	0.58	1.08	2.39	n	0.12	1.08	0.83	283.54
224	史瑞凤	男	63	56	1.62	21.34	121	n	n	n	n	n	y	4.37	0.84	1.52	2.6	n	0.17	0.87	0.71	127.36
225	李国彬	男	63	65	1.68	23.03	156	y	n	n	y	n	y	3.65	0.77	0.95	2.25	y	0.15	1.12	0.72	74.86
226	海潮深	男	63	81	1.72	27.38	111	n	n	n	n	n	y	4.02	1.06	0.84	2.42	y	0.21	1.01	0.82	318.04
227	胡存君	男	63	58	1.65	21.3	146	y	n	n	n	n	y	2.82	0.68	0.97	1.76	y	0.14	0.88	0.52	223
228	李忠全	男	64	79	1.7	27.34	121	n	n	n	n	n	y	4.27	2.15	1.44	2.74	n	0.43	1.02	0.93	94.35
229	韩忠华	男	64	77	1.75	25.14	167	y	n	n	n	n	y	3.16	0.58	1.08	1.67	n	0.12	0.95	0.55	356.62
230	李春辉	男	65	70	1.72	23.66	131	y	n	n	n	n	y	4.84	1.31	1.22	2.95	n	0.26	1.26	1.14	229.53
231	葛敬忠	男	65	80	1.76	25.83	146	y	y	n	n	n	y	3.41	0.55	0.92	2.14	y	0.11	1.22	0.71	245
232	纪亚华	男	65	72	1.8	22.22	179	y	n	n	y	n	y	4.48	0.98	1.19	3.12	n	0.2	1.32	0.88	60
233	肖明渊	男	66	83	1.83	24.78	126	n	n	n	n	n	y	5.29	1.31	1.15	3.35	n	0.26	1.17	1	179.3
234	吴景林	男	67	47	1.63	17.69	143	y	n	y	n	n	y	4.34	1.21	1.55	2.15	n	0.24	0.88	0.79	161.5
235	吴景林	男	67	48	1.63	18.07	141	y	n	n	n	n	y	5.08	1	2	2.89	n	0.2	1.03	0.71	544.9
236	李利民	男	68	61.5	1.6	24.02	132	y	n	n	n	n	y	3.31	0.65	1.06	1.7	n	0.13	1.05	0.68	31.5
237	王占方	男	70	65	1.6	25.39	167	y	n	y	y	n	y	3.29	1.19	0.68	2.21	y	0.24	1.18	0.83	362.7
238	张弘弼	男	71	70	1.68	24.8	119	y	y	n	n	n	y	2.75	1.37	1.3	1.44	n	1.52	0.81	0.57	109.8
239	张克东	男	71	79	1.78	24.93	173	y	n	n	y	n	y	4.61	1.49	1.05	3.26	n	0.3	1.34	0.91	176.77
240	陈孝钿	男	71	69	1.78	21.78	168	n	n	n	y	n	y	4.3	0.93	1.24	2.67	n	0.19	1.03	0.86	238.7
241	朱玉喜	男	72	80	1.7	27.68	118	y	n	n	n	n	y	3.28	0.89	1.55	2.04	n	0.18	1.34	0.74	72.7
242	张克东	男	72	77	1.78	24.3	139	y	n	n	n	n	y	5.05	1.34	1.24	3.64	n	0.27	1.33	1.14	555
243	户宝德	男	72	70	1.77	22.34	130	n	n	n	n	n	y	4.26	0.97	0.93	2.65	y	0.19	1	0.89	182.5
244	刘金斗	男	73	75	1.65	27.55	149	y	y	n	n	n	y	4.52	0.88	1.21	2.93	n	0.18	1.05	0.99	101.7
245	姬长水	男	73	65	1.78	20.52	110	n	y	n	n	n	y	4.14	1.05	1.28	2.46	n	0.21	0.99	0.78	670.2
246	赵显民	男	75	68	1.7	23.53	122	n	n	n	n	n	y	4.04	1.14	1.45	2.7	n	0.23	1.23	0.9	250
247	于维官	男	76	70	1.66	25.4	157	y	y	y	y	n	y	3.16	0.72	1.33	1.82	n	0.14	1.08	0.66	20.6
248	李玉安	男	78	72	1.73	24.06	179	y	n	y	y	n	y	3.89	0.93	1.3	2.46	n	0.19	1.12	0.94	105.5
249	郑士平	男	78	55	1.75	17.96	96	n	y	n	n	n	y	4.98	1.99	1.44	2.87	n	0.4	1.3	0.96	126.5
250	白春和	男	78	66	1.67	23.67	154	y	n	n	y	n	y	5.13	0.83	1.15	3.6	n	0.17	1.53	1.09	123.2
251	计恩明	男	81	83	1.7	28.72	153	n	n	n	n	n	y	4.74	1.53	0.95	3.04	y	0.31	1.04	0.97	132.7
252	李生贤	男	83	65.5	1.7	22.66	158	y	n	y	y	n	y	3.97	0.96	1.42	2.48	n	0.19	1.1	0.95	153.1
253	李青山	男	84	61	1.76	19.69	133	n	n	n	n	n	y	4.38	1.85	0.97	2.73	y	0.37	1.01	0.64	145.2
254	付泳熙	男	17	62.5	1.72	21.13	121	n	n	n	n	n	n	4.05	0.43	1.55	2.09	n	0.09	1.15	0.67	105.9
255	姜金池	女	17	60	1.68	21.26	118	n	n	n	n	n	n	4.37	0.31	1.61	2.17	n	0.06	0.91	0.69	111.1
256	刘佳玲	女	17	52	1.62	19.81	95	n	n	n	n	n	n	3.93	1.29	1.09	2.37	n	0.26	1.25	0.8	417.1
257	张瑞成	男	17	64	1.7	22.15	119	n	n	n	n	n	n	3.76	0.72	1.37	2.32	n	0.14	0.69	0.59	759.96
258	孟令文	女	18	55	1.6	21.48	112	n	n	n	n	n	n	2.61	0.93	1.21	1.49	n	0.19	0.77	0.65	179.3
259	高丽萍	女	18	46	1.68	16.3	115	n	n	n	n	n	n	4.84	2	1.1	3.25	n	0.4	1.32	1.07	79.8
260	杨述望	男	18	80	1.78	25.25	119	n	n	n	n	n	n	5.18	1.19	1.34	3.5	n	0.24	1.32	1.17	79.8
261	李晟岐	男	18	110	1.82	33.21	107	n	n	n	n	n	n	4.38	2.01	1.29	2.71	n	0.4	1.11	0.82	630.8
262	赵宝菊	女	18	57	1.7	19.72	136	y	n	n	n	n	n	4.59	0.5	1.55	2.81	n	0.1	1.49	0.77	68.7
263	廖菲菲	女	18	47	1.45	22.35	113	n	n	n	n	n	n	4.69	1.81	1.09	2.88	n	0.36	1.18	0.87	195.7
264	王策	男	19	65	1.85	18.99	130	y	n	n	n	n	n	4.3	0.88	1.61	2.17	n	0.18	1.11	0.76	95.2
265	赵可欣	女	19	68	1.8	20.99	141	n	y	n	n	n	n	4.55	1.07	1.48	2.56	n	0.21	1.12	0.64	241.9
266	赵子赫	男	19	93.5	1.73	31.24	145	n	n	n	n	n	n	5.26	3.04	1.21	3.41	y	0.61	1.04	1.01	87.6
267	徐小婷	女	19	44.5	1.5	19.78	113	n	n	n	n	n	n	3.51	0.71	1.47	2.02	n	0.14	0.8	0.56	99.7
268	张奇	男	19	51	1.75	16.65	119	n	n	n	n	n	n	3.93	0.62	1.14	2.48	n	0.12	1.29	0.69	290.3
269	刘月	男	19	47	1.55	19.56	118	n	n	n	n	n	n	3.75	0.9	1.33	2.47	n	0.18	1.07	0.66	221.1
270	蔡晓庆	男	21	70	1.7	24.22	127	n	y	n	n	n	n	4.99	0.66	1.24	3.42	n	0.13	1.37	1.08	78.1
271	吴娜	女	21	47	1.53	20.08	97	n	n	y	n	n	n	3.55	1.47	1.1	2.45	n	0.29	0.89	0.84	343
272	邹文晴	女	21	46	1.57	18.66	107	n	n	n	n	n	n	3.27	1.04	1.22	2.09	n	0.21	1.1	0.65	647.2
273	齐泽润	男	21	65	1.77	20.75	126	n	n	n	n	n	n	2.82	0.63	1.28	1.21	n	0.13	1.17	0.59	161.9
274	孙年爽	男	21	42	1.58	16.82	117	n	n	n	n	n	n	3.35	1.28	1.12	2.11	n	0.26	0.96	0.56	239.5
275	王颖	女	32	65	1.58	26.04	137	y	y	n	n	n	n	5.46	1.65	1.2	3.62	n	0.33	1.39	1.24	22.3
276	郭佳	男	32	76	1.76	24.54	120	n	n	n	n	n	n	5.25	1.3	1.17	3.7	n	0.26	1.21	1.1	39.8
277	王越	男	32	76	1.72	25.69	127	n	n	n	n	n	n	3.29	1.55	1.21	1.84	n	0.31	0.95	0.7	259.8
278	李东明	男	32	62	1.63	23.34	130	y	n	n	n	n	n	4.62	1.18	1.15	3.04	n	0.24	1.21	0.95	277.8
279	王丽霞	女	32	60	1.6	23.44	119	n	n	n	n	n	n	4.63	0.83	1.11	2.92	n	0.17	1.46	1.12	33.3
280	张雪莲	女	32	56	1.6	21.88	108	n	n	n	n	n	n	3.48	0.97	1.45	1.97	n	0.19	1.27	0.82	411.7
281	候灵利	女	32	65	1.6	25.39	109	n	n	n	n	n	n	3.74	0.87	1.45	1.86	n	0.17	1.09	0.78	425.1
282	孙岩	男	32	90	1.77	28.73	125	n	n	n	n	n	n	5.45	3.52	0.96	3.44	y	0.7	1.28	1.24	59.2
283	邵小凤	女	32	55	1.63	20.7	121	n	n	n	n	n	n	4.59	0.85	1.7	2.73	n	0.17	1.5	0.9	19.9
284	李东泉	男	32	72	1.75	23.51	116	n	n	n	n	n	n	3.85	0.73	1.36	2.19	n	0.15	0.99	0.61	190.2
285	历娜	女	32	46	1.59	18.2	101	n	n	n	n	n	n	4.18	2.69	1.08	2.51	y	0.54	1.09	0.83	461.6
286	邓兴华	女	32	61	1.72	20.62	114	n	n	n	n	n	n	3.99	0.51	1.33	2.54	n	0.1	1.31	0.7	93
287	邓军	男	32	68	1.7	23.53	111	n	n	n	n	n	n	4.07	1.17	1.06	2.59	n	0.23	1.16	0.72	311.7
288	李索柱	男	32	85	1.78	26.83	119	n	y	n	n	n	n	3.33	0.43	1.5	1.89	n	0.09	1.08	0.57	48
289	刘剑峰	男	32	80	1.74	26.42	156	n	n	n	y	n	n	4.9	0.6	1.24	3.1	n	0.12	0.97	0.86	105.2
290	付文贞	男	32	69	1.63	25.97	112	n	n	n	n	n	n	4.43	0.45	1.14	2.81	n	0.09	1.15	0.77	111.1
291	韩志红	女	32	56	1.68	19.84	103	n	n	n	n	n	n	3.74	1.97	0.56	2.5	y	0.39	1.21	0.97	109.6
292	董淑梅	女	32	57	1.67	20.44	131	n	n	n	n	n	n	4.48	0.89	1.44	2.92	n	0.18	1.05	0.68	661.3
293	徐效颖	女	32	67	1.63	25.22	124	n	n	n	n	n	n	3.5	0.8	1.09	2.28	n	0.16	1.26	0.66	40.4
294	丁文华	女	32	65	1.6	25.39	130	n	n	n	n	n	n	4.49	1.44	1	2.87	y	0.29	1.26	0.93	112.4
295	徐红梅	女	32	55	1.68	19.49	124	n	n	n	n	n	n	3.2	0.89	1.1	2.14	n	0.18	0.65	0.64	93.8
296	吕丽娜	男	32	55	1.64	20.45	137	y	n	n	n	n	n	4.64	1.31	1.34	2.68	n	0.26	1.21	0.76	163.3
297	田野	男	33	87	1.76	28.09	129	n	n	n	n	n	n	4.8	1.11	1.63	3.52	n	0.22	1.9	1.21	23.5
298	闫刚	男	33	63	1.7	21.8	141	y	n	n	n	n	n	4.47	0.57	1.41	2.93	n	0.11	1.12	0.87	178.4
299	郭思彤	女	33	65	1.69	22.76	121	n	n	n	n	n	n	4.89	1.1	1.09	3.67	n	0.22	1.41	0.93	186.7
300	朱小庆	男	33	65	1.72	21.97	117	n	n	n	n	n	n	5.45	1.15	1.7	3.34	n	0.23	1.14	1.03	40.5
301	李红	女	33	59	1.58	23.63	122	n	n	n	n	n	n	3.01	1.07	0.86	1.39	y	0.21	1.21	0.67	217.8
302	孙伟丽	女	33	42	1.58	16.82	107	n	n	n	n	n	n	3.33	0.64	1.25	2.57	n	0.13	1.47	0.74	465.7
303	黄娟	女	33	55	1.65	20.2	128	n	n	n	n	n	n	3.56	0.37	1.61	2.02	n	0.07	0.93	0.51	407.8
304	董连喜	男	33	75	1.7	25.95	151	n	n	n	n	n	n	4.4	1.89	1.26	2.57	n	0.38	1	0.76	36.9
305	陈刚	男	33	106	1.85	30.97	135	n	n	n	n	n	n	4.82	1.7	1.1	3.06	n	0.34	1.35	0.91	32.5
306	李志朋	女	33	70	1.7	24.22	107	n	n	n	n	n	n	4.63	0.74	1.47	2.94	n	0.15	1.17	0.79	212
307	朱天娇	女	33	72	1.62	27.43	96	n	n	n	n	n	n	5.23	1.47	0.94	3.47	y	0.29	1.28	1.17	164.1
308	牛双	女	33	65	1.62	24.77	109	n	n	n	n	n	n	5.56	2.92	1.03	3.48	y	0.58	1.41	1.15	53.2
309	尚磊	男	33	71	1.7	24.57	126	n	n	n	n	n	n	5.5	1.55	1.39	4.07	n	0.31	1.82	1.27	23.6
310	苗冬莹	女	33	55	1.58	22.03	127	n	n	n	n	n	n	4.99	0.92	1.38	3.09	n	0.18	1.06	0.87	334.9
311	张桢桢	女	33	52	1.53	22.21	97	n	n	n	n	n	n	3.98	0.51	1.45	2.43	n	0.1	1.32	0.71	9
312	吕常坤	男	33	68	1.7	23.53	113	n	n	n	n	n	n	4.48	1.94	1	2.96	y	0.39	0.98	0.94	16.5
313	董连生	男	34	70	1.7	24.22	129	n	n	y	n	n	n	4.42	2.4	0.78	2.96	y	0.48	1.16	1.14	41.2
314	李海军	男	34	89	1.78	28.09	140	y	y	n	n	n	n	3.13	1.39	1.31	1.86	n	0.28	1.14	0.88	55.5
315	郭昊	男	34	110	1.75	35.92	133	y	n	n	n	n	n	5.09	1.79	1.15	3.61	n	0.36	1.36	1.2	340
316	芦瑶	女	34	55	1.55	22.89	137	y	n	n	n	n	n	5.3	0.89	1.58	3.33	n	0.18	1.08	1.06	37.5
317	董春丽	女	34	52	1.5	23.11	109	n	n	n	n	n	n	3.49	1.85	1.05	2.11	n	0.37	1.04	0.6	28
318	梁爱芝	女	34	65	1.64	24.17	122	n	n	n	n	n	n	4.38	0.99	1.4	2.74	n	0.2	1.22	0.7	25.4
319	王凯	男	34	72	1.79	22.47	123	n	y	n	n	n	n	3.73	1.19	1.32	2.47	n	0.24	1.12	0.7	13.4
320	温守明	男	34	90	1.8	27.78	150	n	n	n	n	n	n	4.55	1.68	0.92	2.97	y	0.34	1.14	0.95	52.5
321	周秀芬	女	34	77	1.65	28.28	123	n	n	n	n	n	n	5.12	1.06	1.88	3.47	n	0.21	1.72	0.9	21
322	苏德利	女	34	89	1.72	30.08	122	n	n	n	n	n	n	5.6	2.03	1.16	3.61	n	0.41	1.21	1.17	70.1
323	贾艳波	女	34	72	1.64	26.77	113	n	n	n	n	n	n	4.6	1.14	2.02	2.65	n	0.23	0.88	0.67	48.3
324	孙洪伟	男	34	82	1.74	27.08	146	y	n	n	n	n	n	5.41	1.01	1.63	3.16	n	0.2	1.14	0.94	69.1
325	孙福娜	女	34	63	1.6	24.61	148	y	n	n	n	n	n	4.2	1.04	1.41	2.41	n	0.21	0.77	0.64	154.4
326	李洪林	男	34	72	1.8	22.22	156	n	y	n	y	n	n	4.57	1.89	1.49	2.74	n	0.38	1.3	0.7	54.9
327	沙立友	男	35	82.5	1.7	28.55	127	y	y	y	n	n	n	4.57	1.28	1.23	3.15	n	0.26	1.08	1.02	46.3
328	董志萍	女	35	72	1.62	27.43	108	n	n	n	n	n	n	4.01	1.1	1.13	2.3	n	0.22	1.12	0.79	189.1
329	张宇	女	35	54	1.55	22.48	122	n	n	n	n	n	n	4.22	0.83	1.24	2.45	n	0.17	1.1	0.8	65.8
330	李文静	女	35	65	1.62	24.77	142	y	n	n	n	n	n	5.41	0.61	1.6	3.57	n	0.12	1.13	1.08	71
331	丁月敏	女	35	65	1.56	26.71	123	n	n	n	n	n	n	5.1	1.07	1.34	3.67	n	0.21	1.17	1.03	42.4
332	徐天	女	35	87	1.64	32.35	131	y	y	n	n	n	n	3.95	0.7	1.01	2.62	y	0.14	1.09	0.87	507.8
333	王雪松	男	35	83	1.7	28.72	144	n	n	n	n	n	n	4.89	2.39	1.37	2.95	y	0.48	1.51	0.88	26.5
334	李谦	男	35	80	1.89	22.4	119	y	n	n	n	n	n	4.13	1.05	1.13	2.52	n	0.21	1.19	0.81	389.6
335	李谦	男	35	81	1.89	22.68	111	y	n	n	n	n	n	2.59	0.92	0.67	1.97	y	0.18	0.77	0.77	36.8
336	颜廷波	男	35	72	1.7	24.91	114	n	n	n	n	n	n	4.05	1.38	0.79	2.83	y	0.28	1.11	0.91	592.9
337	张景春	男	35	72	1.72	24.34	127	n	n	n	n	n	n	5.33	0.65	1.45	3.33	n	0.13	1.1	0.93	49.3
338	刘凤琴	女	35	53	1.64	19.71	116	n	n	n	n	n	n	4.38	0.73	1.32	2.72	n	0.15	1.57	0.79	250.6
339	谢丹	女	35	51	1.58	20.43	139	n	n	n	n	n	n	4.43	0.48	1.78	2.78	n	0.1	0.88	0.63	230.6
340	高巍	男	35	102	1.79	31.83	129	n	n	n	n	n	n	4.54	0.5	1.22	3.06	n	0.1	1.1	0.8	23.6
341	孙丽娜	女	35	50	1.62	19.05	106	n	n	n	n	n	n	4.41	1.07	1.26	2.74	n	0.21	1.5	0.77	95.6
342	张春霞	女	35	60	1.65	22.04	95	n	n	n	n	n	n	4.92	0.89	1.12	3	n	0.18	0.99	0.96	26.2
343	程桂珍	女	35	46	1.52	19.91	97	n	n	n	n	n	n	3.56	0.61	1.14	2.21	n	0.12	1.23	0.66	6.2
344	赵宝华	女	35	65	1.6	25.39	115	n	n	n	n	n	n	4.52	1.88	1.19	3.03	n	0.38	1.13	0.93	46
345	金俊泽	男	35	66	1.69	23.11	125	n	n	n	n	n	n	5.05	0.61	1.4	3.02	n	0.12	1	0.83	23.3
346	王丹	男	35	58	1.6	22.66	109	n	n	n	n	n	n	4.08	0.61	1.59	2.31	n	0.12	0.85	0.59	5.1
347	赵玉明	男	36	85	1.72	28.73	131	y	n	n	n	n	n	3.26	1.41	1.23	1.96	n	0.28	0.99	0.64	190.1
348	付滨丽	女	36	55	1.55	22.89	130	y	y	n	n	n	n	4.13	1.87	1.45	1.96	n	0.37	1.03	0.85	27.4
349	姜延东	男	36	81	1.72	27.38	110	n	n	n	n	n	n	3.98	0.69	1.23	2.31	n	0.14	1.16	0.86	250.3
350	桂勒	女	36	61	1.7	21.11	125	n	n	n	n	n	n	3.45	1.75	0.83	1.85	y	0.35	1.14	0.69	136.8
351	唐晓丽	女	36	57	1.6	22.27	143	n	n	n	n	n	n	4.71	0.7	1.23	3.49	n	0.14	1.54	0.89	452.3
352	张天慧	女	36	66	1.57	26.78	158	n	n	n	y	n	n	5.62	2.52	1.07	3.58	y	0.5	1.14	1.03	108
353	陈凤艳	女	36	66	1.6	25.78	114	n	n	n	n	n	n	4.19	1.9	0.65	3.1	y	0.38	1.18	0.97	90.3
354	王丽洁	女	36	75	1.61	28.93	129	n	n	n	n	n	n	4.18	1.73	1.13	2.48	n	0.35	1.45	0.74	30.9
355	李香雪	女	36	65	1.66	23.59	110	n	n	n	n	n	n	4	1.45	1.46	2.39	n	0.29	1.11	0.75	376.9
356	邓玉英	女	36	59	1.55	24.56	128	n	n	n	n	n	n	2.86	0.61	1.19	1.63	n	0.12	1.05	0.59	190.3
357	刘士华	男	36	55	1.65	20.2	116	n	n	n	n	n	n	5.61	1.17	1.17	3.7	n	0.23	1.55	1.11	54.8
358	杨树亮	男	36	71	1.73	23.72	127	n	n	n	n	n	n	4.68	0.99	0.95	2.85	y	0.2	1.45	0.85	80.2
359	刘国政	男	36	64	1.68	22.68	141	n	n	n	n	n	n	3.28	1.25	0.94	2.05	y	0.25	1.01	0.63	1221.6
360	周闯	男	36	80	1.87	22.88	115	n	n	n	n	n	n	4.19	0.91	1.15	2.64	n	0.18	1.24	0.84	48.2
361	王海艳	男	36	49	1.6	19.14	127	n	n	n	n	n	n	3.28	0.62	1.03	2.14	y	0.12	1.33	0.69	317.6
362	赵玉红	女	37	70	1.56	28.76	145	y	n	y	n	n	n	4.4	0.84	1.4	2.56	n	0.17	1.1	0.94	119.6
363	谢永忠	男	37	60	1.68	21.26	128	n	y	n	n	n	n	4.29	0.86	1.49	2.57	n	0.17	1.49	0.77	34.3
364	刘志军	男	37	73	1.75	23.84	120	n	y	n	n	n	n	5.59	1.4	1.16	3.58	n	0.28	1.19	1.1	223.8
365	陈绍辉	男	37	77	1.7	26.64	129	n	y	y	n	n	n	5.02	2.08	1.18	3.38	n	0.42	1.3	1.09	89.3
366	韩忠慧	女	37	50	1.55	20.81	109	n	n	n	n	n	n	4.29	0.45	1.48	2.68	n	0.09	1.17	0.84	101.9
367	金洪双	男	38	61	1.6	23.83	119	n	y	y	n	n	n	4.05	0.75	1.63	1.94	n	0.15	1.19	0.74	196
368	崔国华	女	38	56	1.61	21.6	136	n	n	n	n	n	n	4.05	0.82	1.37	2.44	n	0.16	1.14	0.87	65.2
369	张晓艳	女	38	75	1.58	30.04	123	n	n	n	n	n	n	5	1.44	1.58	3.86	n	0.29	1.45	1.37	74
370	吴双岭	男	38	72	1.69	25.21	133	n	n	n	n	n	n	3.37	0.88	1.02	2.07	y	0.18	0.85	0.6	67.9
371	朴锦淑	女	38	52	1.51	22.81	109	n	n	n	n	n	n	4.79	1.38	1.04	2.99	n	0.28	1.07	0.96	83.6
372	李国涛	男	38	83	1.68	29.41	122	n	n	y	n	n	n	4.61	2.1	0.95	2.99	y	0.42	0.98	0.92	961
373	周海英	女	38	77	1.58	30.84	141	n	n	n	n	n	n	5.63	4.6	0.83	3.22	y	0.92	1.35	0.99	89.2
374	马志	男	39	82	1.72	27.72	110	n	n	y	n	n	n	3.5	1.53	1.08	1.6	n	0.31	1.09	0.78	105.7
375	徐娜	女	39	82	1.62	31.25	123	n	n	n	n	n	n	3.8	0.85	1.04	2.25	n	0.17	0.89	0.74	32.2
376	宫尉钧	男	39	94	1.82	28.38	145	n	y	y	n	n	n	3.72	1	1.03	2.38	y	0.2	1.16	0.62	16.5
377	马凤兰	女	39	59	1.55	24.56	138	y	n	n	n	n	n	3.92	1.13	1.12	2.38	n	0.23	1.3	0.7	273
378	薛铁	男	39	105	1.78	33.14	95	y	n	n	n	n	n	4.99	0.85	1.48	2.97	n	0.17	1.02	0.96	372.4
379	刘淑华	女	39	48	1.6	18.75	123	n	n	n	n	n	n	2.84	0.69	1.22	1.74	n	0.14	0.78	0.66	423.4
380	任拥军	男	39	68	1.7	23.53	105	n	n	n	n	n	n	3.99	0.67	1.22	2.71	n	0.13	1.26	0.77	320.6
381	邢德权	男	39	84	1.78	26.51	121	n	y	y	n	n	n	4.2	1.67	0.91	2.68	y	0.33	1.29	0.88	230.3
382	任拥军	男	39	66	1.7	22.84	117	n	n	y	n	n	n	3.44	0.79	1.29	2.31	n	0.16	1.06	0.64	107.3
383	夏立芬	女	40	70	1.56	28.76	146	y	n	y	n	n	n	4.57	1.42	1.1	2.84	n	0.28	1.58	1.07	639.9
384	于海荣	女	40	63	1.63	23.71	126	n	y	n	n	n	n	3.96	0.69	1.14	2.35	n	0.14	1.29	0.81	149.2
385	徐笑春	女	40	71	1.6	27.73	123	n	n	n	n	n	n	5.55	0.97	1.64	3.32	n	0.19	1.22	1.14	171.1
386	侯云龙	男	40	67	1.7	23.18	137	y	n	n	n	n	n	3.87	1.65	1.12	2.35	n	0.33	1.04	0.78	27.4
387	王建君	男	40	70	1.6	27.34	153	n	n	y	y	n	n	3.92	3.81	1.04	2.2	y	0.76	1.17	0.73	74.5
388	吴刚	男	40	82	1.7	28.37	127	y	y	y	n	n	n	4.37	1.4	1.02	3	y	0.28	1.18	0.95	270.8
389	刘晶	男	40	64.5	1.65	23.69	140	n	n	n	n	n	n	4.96	0.72	1.44	3.15	n	0.14	1.27	0.94	56.8
390	刘明涛	男	40	82	1.7	28.37	152	y	n	n	n	n	n	3.99	1.52	0.74	2.52	y	0.3	1.05	0.93	56.4
391	滕润恒	男	40	90	1.74	29.73	123	n	n	n	n	n	n	4.52	1.97	0.78	2.97	y	0.39	1.06	0.95	160.1
392	侯丽平	女	40	60	1.63	22.58	130	n	n	n	n	n	n	5.5	0.64	1.53	3.66	n	0.13	1.2	1.11	83.8
393	刘艳秋	女	40	57	1.55	23.73	100	n	n	n	n	n	n	3.85	0.72	1.15	2.36	n	0.14	0.98	0.84	186.3
394	赵玉华	女	40	85	1.58	34.05	126	n	n	n	n	n	n	5.02	1.32	1.54	2.89	n	0.26	1.44	0.88	44.5
395	刘宝华	男	40	45	1.56	18.49	103	n	n	n	n	n	n	3.82	0.95	1.58	2.27	n	0.19	0.85	0.6	138.3
396	孙莲新	男	40	58	1.68	20.55	99	n	y	n	n	n	n	5.11	1.01	1.35	3.22	n	0.2	1.46	0.88	121.8
397	郑秀英	男	40	60	1.6	23.44	115	n	n	n	n	n	n	4.03	1.29	1.4	2.52	n	0.26	0.87	0.71	1584
398	葛平宝	男	41	72	1.7	24.91	135	y	n	n	n	n	n	5.37	1.06	1.33	3.59	n	0.21	1.15	1.05	28.7
399	陈玉娟	女	41	60	1.65	22.04	141	y	n	y	n	n	n	3.82	0.62	1.31	2.44	n	0.12	1.06	0.9	215.1
400	赵立波	男	41	92	1.76	29.7	153	y	y	y	n	n	n	4.85	2.08	1.11	2.99	n	0.42	1.79	1.1	209.1
401	尹丽娟	女	41	75	1.61	28.93	159	n	n	n	y	n	n	5.1	5.03	0.72	2.57	y	1.01	1.18	1.13	52.9
402	李晓光	男	41	72	1.73	24.06	114	n	n	n	n	n	n	5.34	1.36	1.25	3.2	n	0.27	1.25	0.99	138
403	崔鸿雁	女	41	60	1.64	22.31	147	n	n	n	n	n	n	4.53	2.34	1.33	2.78	y	0.47	1.51	0.84	122.5
404	崔冬梅	女	41	67	1.54	28.25	108	n	n	n	n	n	n	5.03	0.99	2.14	3.69	n	0.2	1.16	0.95	138
405	都艳萍	男	41	65	1.56	26.71	123	y	n	n	n	n	n	4.32	0.74	1.52	3.01	n	0.15	1.71	0.93	58.8
406	王安梅	女	41	52	1.58	20.83	126	n	n	n	n	n	n	4.31	1.73	1.08	2.94	n	0.35	1.17	0.87	37.5
407	李凤霞	男	41	65	1.63	24.46	121	n	n	n	n	n	n	4.04	1.92	1.35	2.66	n	0.38	1.33	0.71	377.4
408	姚长霞	女	42	51	1.55	21.23	134	y	n	n	n	n	n	3.69	0.62	1.4	2.57	n	0.12	1.3	0.79	114.3
409	蔡凤敏	女	42	72	1.6	28.13	148	y	y	n	n	n	n	4.62	1.33	1.22	2.83	n	0.27	1.58	1.01	421.9
410	陈兴	男	42	70	1.7	24.22	124	n	n	y	n	n	n	3.75	0.74	1.14	2.28	n	0.15	1.39	0.76	218
411	张东华	女	42	82	1.65	30.12	132	y	n	n	n	n	n	6.55	0.9	1.3	4.15	y	0.18	2.15	1.43	119
412	吴颖萍	女	42	71	1.7	24.57	126	n	n	n	n	n	n	4.86	1.33	1.31	3.12	n	0.27	1.06	1.03	295.8
413	王艳秋	女	42	59	1.6	23.05	139	n	n	n	n	n	n	4.99	1.18	1.15	3.17	n	0.24	1.22	1.16	1148.2
414	于桂香	女	42	57.5	1.57	23.33	104	n	n	n	n	n	n	3.71	1.22	0.83	2.39	y	0.24	1.05	0.72	464.1
415	曲河	男	42	62	1.75	20.24	116	n	y	y	n	n	n	3.44	0.81	1.16	2.09	n	0.16	1.13	0.61	135.4
416	郑伟	男	42	68	1.7	23.53	143	y	y	y	n	n	n	3.32	0.84	0.73	2.02	y	0.17	1.1	0.72	129.4
417	于秀波	女	42	57	1.58	22.83	122	n	n	n	n	n	n	3.83	2.32	0.91	2.58	y	0.46	1.39	0.73	94.8
418	叶亚波	女	42	60	1.58	24.03	147	n	n	n	n	n	n	4.49	1.24	0.98	2.76	y	0.25	1.22	0.85	109.1
419	董喜英	女	42	65	1.58	26.04	117	n	y	n	n	n	n	3.3	1.25	0.97	2.18	y	0.25	1.11	0.64	56.8
420	唐永泉	男	42	76	1.72	25.69	175	n	n	n	y	n	n	4.27	1.22	0.86	2.74	y	0.24	1.1	0.87	109
421	高东梅	女	42	65	1.66	23.59	170	y	n	n	y	n	n	5.08	1.63	1.52	3	n	0.33	1.39	0.88	188.6
422	刘喜军	男	42	70	1.7	24.22	135	n	n	n	n	n	n	3.87	1.51	1.18	2.46	n	0.3	1.16	0.77	257.4
423	翟凤琴	女	42	62	1.58	24.84	116	n	n	n	y	n	n	4.66	2.07	1.1	2.89	n	0.41	1.46	0.86	69.4
424	柳权	男	43	90	1.76	29.05	137	y	y	y	n	y	n	4.65	0.74	1.21	2.78	n	0.15	1.86	1.04	41.9
425	司敬东	女	43	55	1.67	19.72	109	n	n	n	y	n	n	4.42	1.02	1.7	2.28	n	0.2	0.93	0.78	189.7
426	刘宝华	女	43	60	1.6	23.44	124	n	n	n	n	n	n	4.52	1.33	1.25	3.03	n	0.27	1.06	0.93	184.6
427	张铁成	男	43	50	1.7	17.3	115	n	n	y	n	n	n	3.4	0.84	1.16	1.97	n	0.17	0.63	0.61	119
428	蔡喜春	男	43	80	1.7	27.68	115	n	y	y	n	n	n	3.18	1.19	0.77	1.82	y	0.24	1.08	0.69	301.8
429	盛晓东	男	43	90	1.74	29.73	136	y	n	n	n	n	n	4.2	1.47	0.92	2.8	y	0.29	1.24	0.84	87.8
430	白丽娜	女	43	55	1.6	21.48	146	n	n	n	n	n	n	4.85	1.04	1.41	2.84	n	0.21	1.33	0.73	85.3
431	崔家新	男	43	70	1.81	21.37	134	y	y	n	n	n	n	4.62	2.23	0.82	3.08	y	0.45	1.19	0.98	156.2
432	赵风花	女	43	55	1.6	21.48	119	n	n	n	n	n	n	4.93	1.4	0.89	3.28	y	0.28	1.25	1.24	178.5
433	刘晓秋	男	43	85	1.74	28.08	127	n	n	n	n	n	n	5.26	1.17	1.12	3.18	n	0.23	1.15	1	543.2
434	滕朝辉	男	43	72	1.7	24.91	134	n	n	n	n	n	n	4.78	0.84	2.22	2.7	n	0.17	1.26	0.72	81.5
435	王凤荣	女	43	57	1.55	23.73	171	n	n	n	n	n	n	5	1.6	1.56	3.18	n	0.32	1.63	0.94	75.1
436	孙立新	女	44	55	1.67	19.72	108	n	n	n	n	n	n	3.3	0.71	1.15	1.84	n	0.14	0.98	0.59	545.1
437	张铁成	男	44	48	1.7	16.61	120	n	n	n	n	n	n	4.81	0.72	1.74	2.9	n	0.14	1.19	0.81	213.6
438	王殿凤	女	44	64	1.6	25	107	n	n	n	n	n	n	3.72	1.51	0.81	2.5	y	0.3	1.21	0.77	398.8
439	司秀芳	男	44	63	1.63	23.71	134	n	n	n	n	n	n	4.5	1.51	1.26	2.73	n	0.3	1.04	0.85	46.1
440	陶秀玲	女	44	51	1.5	22.67	149	n	n	n	n	n	n	5.37	0.8	1.56	3.45	n	0.16	1.49	1.01	293.2
441	李熙国	男	44	71	1.72	24	112	n	n	n	n	n	n	4.18	0.49	1.09	2.63	n	0.1	1.36	0.78	39.4
442	雍国峰	男	44	73	1.72	24.68	178	y	n	n	y	n	n	3.52	0.77	1.63	2.09	n	0.15	1.06	0.57	86.5
443	蒋玉梅	女	44	96	1.72	32.45	127	y	n	n	n	n	n	3.85	2.75	0.62	2.44	y	0.55	0.93	0.74	54.1
444	宋春梅	女	44	66	1.6	25.78	114	n	n	n	n	n	n	4.26	0.91	1.23	2.1	n	0.18	1.07	0.77	219.7
445	杨春喜	男	44	85	1.7	29.41	135	n	n	n	n	n	n	5.32	2.28	1.09	3.77	y	0.46	1.43	1.24	14.6
446	刘晓波	男	44	60	1.75	19.59	113	n	y	y	n	n	n	4.65	1.08	0.85	2.89	y	0.22	1.81	1	45.3
447	车亚贤	男	44	64	1.67	22.95	118	n	n	n	n	n	n	5.09	1.39	1.36	3.33	n	0.28	1.27	1.09	76.5
448	苑玉杰	男	44	54	1.7	18.69	107	n	n	n	n	n	n	5.76	1.21	1.69	3.74	y	0.24	1.39	0.97	119.1
449	于婧琪	女	45	66	1.68	23.38	96	n	n	n	n	n	n	4.22	1.32	1.09	2.57	n	0.26	1.16	0.88	15.3
450	柴成献	男	45	75	1.67	26.89	117	n	y	y	n	n	n	3.91	1.26	0.91	2.47	y	0.25	1.7	0.97	92.4
451	康英利	男	45	85	1.75	27.76	151	y	n	n	n	n	n	5.02	0.44	2	2.69	n	0.09	1.33	0.72	73.6
452	何秀娟	女	45	50	1.62	19.05	143	y	n	n	n	n	n	5	0.73	1.97	3.41	n	0.15	0.98	0.96	337.9
453	朱金英	女	45	69	1.6	26.95	118	n	n	n	n	n	n	7.25	0.8	1.71	5.06	y	0.16	1.39	1.3	69.8
454	孙秀波	女	45	55	1.58	22.03	141	y	n	n	n	n	n	5.05	1.32	0.94	3.14	y	0.26	1.19	1	347.6
455	王伟兴	男	45	85	1.69	29.76	141	y	n	n	n	n	n	5.4	1.58	1.59	3.39	n	0.32	1.03	0.96	66.7
456	刘志国	男	45	55	1.65	20.2	127	n	y	y	n	n	n	3.18	0.88	0.91	2.15	y	0.18	0.93	0.65	257
457	徐春生	男	45	65	1.8	20.06	125	n	n	y	n	n	n	3.89	0.87	0.93	2.37	y	0.17	1.17	0.7	128.3
458	黄波	女	45	64	1.62	24.39	148	n	n	n	n	n	n	3.75	0.62	1.27	2.4	n	0.12	1	0.65	188.6
459	张皙林	女	45	48	1.6	18.75	161	n	n	n	n	n	n	4.44	0.48	1.92	2.59	n	0.1	1.13	0.57	125.2
460	吕秀文	女	45	65	1.64	24.17	179	n	n	n	y	n	n	5.36	1.41	1.9	4	n	0.28	1.53	1.52	874.4
461	王玉杰	女	46	50	1.62	19.05	113	n	n	n	n	n	n	4.72	0.98	1.87	2.86	n	0.2	1.2	0.7	105.6
462	文雅杰	女	46	60	1.6	23.44	146	y	n	n	n	n	n	4.2	0.58	1.45	2.55	n	0.12	1.15	0.72	875.4
463	高明海	男	46	87	1.76	28.09	120	n	n	n	n	n	n	4.19	0.98	0.93	2.66	y	0.2	1.62	0.84	38.1
464	逄菊艳	女	46	72	1.74	23.78	163	y	n	n	y	n	n	4.3	1.13	1.25	3.8	n	0.23	1.35	1.21	508.5
465	施连杰	女	46	52	1.58	20.83	118	n	n	n	n	n	n	3.82	1.6	0.66	2.51	y	0.32	1.58	0.89	217.8
466	杨国立	男	46	59	1.6	23.05	132	n	y	y	n	n	n	3.21	1.29	0.81	2.04	y	0.26	1.08	0.68	142.3
467	张占方	男	46	83	1.73	27.73	125	n	n	n	n	n	n	4.91	4.38	0.89	3	y	0.88	1.08	1	22.6
468	骆凤兰	男	46	54	1.55	22.48	142	y	n	n	n	n	n	4.53	1.13	1.29	2.7	n	0.23	1.06	0.73	402.5
469	秦迪	女	47	62	1.57	25.15	134	y	n	n	n	n	n	4.67	0.46	1.56	2.79	n	0.09	0.92	0.92	145.9
470	郑玺贤	女	47	65	1.6	25.39	111	n	n	n	n	n	n	5.84	9.02	0.95	2.04	y	1.8	1.16	0.85	159.3
471	鞠凤玲	女	47	65	1.63	24.46	121	n	n	n	n	n	n	6.69	2	1.92	4.3	y	0.4	1.46	1.12	73.4
472	贾鸿涛	男	47	73	1.7	25.26	153	n	y	n	y	n	n	4.56	1.66	0.83	3.39	y	0.33	1.19	0.94	159.1
473	李舒	女	47	58.5	1.6	22.85	108	y	n	n	n	n	n	5.35	1.14	1.72	3.4	n	0.23	1.19	1.06	401.8
474	邓坤	男	47	62	1.68	21.97	113	n	y	n	n	n	n	5.7	0.86	1.29	3.82	n	0.17	1.29	1.11	84.6
475	杨国立	男	47	70	1.65	25.71	118	n	n	n	n	n	n	3.43	1.12	0.97	2.19	y	0.22	0.81	0.67	106
476	李成源	男	48	72	1.78	22.72	156	y	n	y	y	n	n	4.32	0.66	1.36	2.38	n	0.13	0.99	0.74	267.6
477	王梅雪	女	48	65	1.62	24.77	106	n	n	n	n	n	n	4.77	0.96	1.41	2.7	n	0.19	1.47	0.82	299
478	孙桂荣	女	48	76	1.66	27.58	148	n	n	n	n	n	n	6.89	1.46	2.25	4.61	y	0.29	1.41	1.25	174.5
479	葛方友	男	48	65	1.8	20.06	143	n	n	n	n	n	n	4.9	1.63	1.11	3.02	n	0.33	0.91	0.91	17.6
480	丁大勇	男	48	61	1.68	21.61	130	y	n	n	n	n	n	4.27	0.82	1.43	2.69	n	0.16	1.42	0.72	218.3
481	杜云峰	女	48	60	1.62	22.86	91	n	n	n	n	n	n	5.1	1.24	1.41	3.66	n	0.25	1.31	1.14	16.4
482	胡艳	男	48	65	1.63	24.46	113	n	n	n	n	n	n	4.38	0.88	1.15	2.69	n	0.18	1.01	0.78	537.6
483	侯敏	女	49	58	1.5	25.78	152	y	n	n	y	n	n	4.81	0.55	1.34	2.82	n	0.11	1.27	0.95	47.5
484	孙晓平	女	49	54	1.64	20.08	149	y	n	n	n	n	n	4.22	2.38	0.98	2.58	y	0.48	1.69	0.95	11.2
485	申云海	男	49	76	1.78	23.99	137	y	y	y	n	n	n	4.2	3.55	0.78	2.49	y	0.71	1.21	0.94	40.7
486	王春梅	女	49	50	1.6	19.53	139	n	n	n	n	n	n	4.31	0.69	1.05	2.51	n	0.14	1.11	0.95	58.5
487	赵佳威	男	49	72	1.62	27.43	133	n	n	n	n	n	n	4.76	1.49	1.43	3.16	n	0.3	1.13	0.89	168.5
488	王冬梅	女	49	62	1.6	24.22	128	n	n	n	n	n	n	4.11	0.87	1.2	2.69	n	0.17	1.51	0.79	83.6
489	关建国	男	49	65	1.6	25.39	135	n	n	n	n	n	n	3.49	0.68	1.26	2.13	n	0.14	1.14	0.7	542.3
490	胡俊杰	男	49	106	1.82	32	118	n	n	y	n	n	n	5.18	0.99	1.33	3.85	n	0.2	1.33	1.07	12.3
491	马春红	男	49	71	1.68	25.16	135	y	n	n	n	n	n	3.28	2.67	0.6	1.63	y	0.53	1.14	0.64	286.4
492	付秀娟	女	49	56	1.57	22.72	120	n	n	n	n	n	n	5.61	1.25	1.83	3.28	n	0.25	1.3	0.94	333
493	庞爱华	女	49	80	1.6	31.25	104	n	n	y	n	n	n	4.34	0.91	1.02	2.81	y	0.18	1.4	0.89	417.6
494	周亚义	男	49	83	1.85	24.25	129	n	n	n	n	n	n	4.24	1.11	1.2	2.52	n	0.22	1.69	1	131.8
495	王富东	男	49	57	1.7	19.72	120	n	n	n	n	n	n	4.09	1.43	1.29	2.61	n	0.29	1.22	0.69	80.9
496	李桂芹	女	49	56	1.63	21.08	134	y	n	n	n	n	n	4.28	0.66	1.17	2.7	n	0.13	1.24	0.7	303.5
497	丁玲玲	女	49	49	1.62	18.67	93	n	n	n	n	n	n	4.3	0.69	1.36	2.7	n	0.14	0.83	0.74	51.6
498	陆艳华	女	49	65	1.56	26.71	134	n	n	n	n	n	n	4.14	0.6	1.34	2.56	n	0.12	1.25	0.71	74.6
499	方淑维	女	49	61	1.5	27.11	134	n	n	n	n	n	n	4.29	1.84	0.82	2.65	y	0.37	1.22	0.92	290
500	申云海	男	49	75	1.78	23.67	134	n	n	n	n	n	n	4.94	6.49	0.74	2.3	y	1.3	1.18	0.75	95.8
501	杨忠伍	男	49	64	1.7	22.15	130	y	n	n	n	n	n	3.07	1.2	1.11	1.88	n	0.24	1.11	0.62	230.3
502	邱丹	男	49	62	1.6	24.22	135	y	n	n	n	n	n	5.63	0.6	1.87	4.37	n	0.12	1.28	1.23	84.3
503	张辅文	男	49	67	1.77	21.39	111	n	y	y	n	n	n	4.05	0.9	1.29	2.55	n	0.18	1.25	0.77	205.3
504	李佰超	男	50	75	1.74	24.77	111	n	n	n	n	n	n	3.19	0.8	1.21	1.9	n	0.16	1.23	0.66	292.7
505	胡桂红	女	50	75	1.6	29.3	126	n	y	n	n	n	n	5.22	1.25	1.69	3.12	n	0.25	1.07	0.94	69.4
506	吴仕田	男	50	86	1.72	29.07	155	y	n	y	y	n	n	4.52	1.11	1.06	2.86	n	0.22	1.48	1.02	136.8
507	王顺功	男	50	82	1.73	27.4	166	y	y	y	n	n	n	5.3	0.42	1.68	3.76	n	0.08	1.28	1.03	159.9
508	白久芳	女	50	66	1.64	24.54	125	n	n	n	n	n	n	3.7	0.87	1.18	2.23	n	0.17	1.34	0.68	170.9
509	赫英惠	女	50	60	1.63	22.58	129	y	n	n	n	n	n	4.77	0.79	1.54	3.02	n	0.16	1.47	0.97	451.4
510	王慧影	女	50	55	1.67	19.72	134	y	y	y	n	n	n	4.74	0.77	1.14	3.34	n	0.15	1.4	0.99	38.3
511	彭友成	男	50	65	1.74	21.47	129	n	y	n	n	n	n	3.72	1.32	0.69	2.78	y	0.26	1.09	0.83	282.7
512	关丽娟	女	50	55	1.56	22.6	168	y	n	n	y	n	n	5.67	1.13	1.63	3.9	n	0.23	1.29	1.07	38.9
513	孙万友	男	50	60	1.6	23.44	129	n	y	y	n	n	n	2.76	1.3	0.71	1.66	y	0.26	0.75	0.58	83
514	何治安	男	50	72.5	1.7	25.09	146	n	y	n	n	n	n	4.21	0.92	1	3.01	y	0.18	1.17	0.85	47.6
515	程丽艳	男	50	47	1.6	18.36	112	n	n	n	n	n	n	3.96	0.71	1.64	2.25	n	0.14	1.12	0.71	298.8
516	赵玉娟	女	50	64	1.64	23.8	115	n	n	n	n	n	n	4.32	2.34	1.13	2.52	y	0.47	1.18	0.76	141.9
517	房玉珍	女	50	65	1.6	25.39	118	n	n	n	n	n	n	5	1	1.8	3.58	n	0.2	1.55	1.12	12.8
518	王彦	女	50	62	1.6	24.22	126	n	n	n	n	n	n	4.95	0.85	1.53	2.83	n	0.17	1.36	0.84	155.3
519	田国臣	男	50	80	1.8	24.69	144	n	n	n	n	n	n	5.56	1.42	1.06	3.97	n	0.28	1.59	1.21	136.8
520	李春清	女	50	44	1.6	17.19	97	n	n	n	n	n	n	3.16	0.7	1	2.01	y	0.14	1.1	0.65	10.1
521	胡朝彬	男	50	69	1.68	24.45	120	n	y	n	n	n	n	5.56	4.74	0.96	3.15	y	0.95	1.28	1.08	150.9
522	杨秀芝	女	50	85	1.7	29.41	115	n	n	n	n	n	n	4.45	1.23	1.09	3.33	n	0.25	1.75	0.91	158.4
523	杨秀芝	男	50	84	1.65	30.85	117	n	n	n	n	n	n	3.99	1.81	1.1	2.89	n	0.36	1.2	0.83	259.4
524	邵清玲	男	50	60	1.6	23.44	129	n	n	n	n	n	n	4.68	1.07	1.81	3.01	n	0.21	0.79	0.66	179.3
525	李金荣	男	50	53	1.55	22.06	112	n	n	n	n	n	n	4.39	1.36	1.16	2.69	n	0.27	1.12	0.81	248.7
526	张贵英	女	51	64.5	1.58	25.84	128	n	n	n	n	n	n	5.2	1.23	1.19	3.57	n	0.25	1.53	1.14	228.9
527	王桂香	女	51	70	1.6	27.34	134	y	n	n	y	n	n	4.07	1.18	1.16	2.63	n	0.24	1.07	0.79	169.5
528	武丽红	女	51	62.5	1.48	28.53	159	n	n	n	y	n	n	5.01	2.17	0.95	3.62	y	0.43	1.15	1.08	268.7
529	梁继东	男	51	75	1.7	25.95	136	n	n	n	n	n	n	4.26	0.69	1.27	2.54	n	0.14	0.87	0.78	52.8
530	宋艳坤	女	51	63	1.65	23.14	114	n	n	n	n	n	n	5.64	4.48	0.91	3.2	y	0.9	2.05	1.08	14.1
531	齐晶	女	51	59	1.6	23.05	138	n	n	n	n	n	n	6.66	0.84	1.55	4.37	y	0.17	1.32	1.32	66.1
532	李淑玲	女	51	53	1.66	19.23	128	n	n	n	n	n	n	3.1	1.23	1.02	1.97	y	0.25	0.66	0.49	20
533	李春霞	女	51	60	1.65	22.04	148	y	n	n	n	n	n	4.22	0.66	1.03	2.83	y	0.13	1.19	0.98	126.9
534	刘惠荣	女	51	50	1.58	20.03	148	n	n	n	n	n	n	5.47	1	1.42	3.41	n	0.2	1.17	1.1	413.4
535	KUBOTAYOSHIHITO	男	51	66	1.69	23.11	140	n	n	n	n	n	n	5.1	1.42	1.26	3.77	n	0.28	1.69	1.14	51.8
536	尚红	女	52	61.5	1.6	24.02	154	y	y	n	y	n	n	4.89	1.12	1.38	2.99	n	0.22	1.03	0.99	26.4
537	何秀荣	女	52	59	1.59	23.34	113	n	n	n	n	n	n	4.81	2.79	1	3.38	y	0.56	1.49	1.09	125.3
538	李淑义	女	52	79	1.59	31.25	122	y	n	n	n	n	n	4.1	1.71	0.97	2.78	y	0.34	1.63	0.86	63.3
539	孙洪文	男	52	66	1.64	24.54	121	n	n	n	n	n	n	4.53	1.08	1.53	2.5	n	0.22	1.52	0.89	216.6
540	于萍	女	52	54	1.6	21.09	100	n	n	n	n	n	n	4.66	0.69	1.47	2.97	y	0.14	1.49	0.85	29.6
541	刘丽昕	女	52	62	1.6	24.22	134	y	n	n	n	n	n	3.3	0.53	2.12	3.83	n	0.11	2.1	1.08	222.3
542	李佳玉	女	52	60	1.6	23.44	131	y	n	n	n	n	n	5	1.34	1.57	3.68	n	0.27	1.42	1.03	509
543	古英梅	女	52	45	1.48	20.54	123	n	n	n	n	n	n	4.91	0.42	1.45	3.09	n	0.08	1.71	0.88	127.7
544	张井福	男	52	60	1.64	22.31	151	n	n	n	n	n	n	3.69	2.12	0.63	2.46	y	0.42	1.67	0.85	20.2
545	曹春玲	女	52	60	1.55	24.97	131	n	n	n	n	n	n	4.61	1.26	1.31	2.87	n	0.25	1.15	0.77	132.3
546	纪玉华	女	52	60	1.62	22.86	111	n	n	n	n	n	n	4.66	0.95	1.58	3.25	n	0.19	1.03	0.92	70
547	刘金杰	女	52	100	1.6	39.06	134	n	n	n	n	n	n	5.2	1.46	1.1	4.01	n	0.29	1.61	1.29	202.7
548	张春强	男	52	65	1.72	21.97	109	n	n	n	n	n	n	4.6	1.91	0.8	2.86	y	0.38	1.68	0.95	203.9
549	李亲财	男	52	70	1.65	25.71	199	y	n	n	y	n	n	3.15	0.72	0.96	1.92	y	0.14	1.17	0.6	161.6
550	张连芝	女	52	75	1.7	25.95	153	n	n	n	y	n	n	4.83	2.22	1.11	2.99	n	0.44	1.54	0.93	258.7
551	孙荔姝	女	52	60	1.65	22.04	145	n	n	n	n	n	n	5.12	0.76	1.35	3.1	n	0.15	1.14	0.98	54.3
552	丁志辉	男	52	68	1.68	24.09	118	n	n	n	n	n	n	4.3	0.75	1.46	2.72	n	0.15	1.33	0.82	112.1
553	陈凯	男	52	65	1.65	23.88	98	n	n	n	n	n	n	5.35	1.15	1.53	3.19	n	0.23	1.34	0.91	52.2
554	王兰琴	男	52	65	1.58	26.04	146	y	n	n	n	n	n	5.51	1.12	1.98	3.77	n	0.22	1.16	1.04	168.3
555	王淑贤	男	52	62	1.65	22.77	106	n	n	n	n	n	n	3.97	2.04	1.16	2.43	n	0.41	1.27	0.76	121.8
556	纪小燕	女	53	50	1.6	19.53	149	y	n	n	n	n	n	2.44	1.34	1.33	1.07	n	0.27	0.78	0.49	244.6
557	王力娟	女	53	72	1.6	28.13	148	y	y	n	n	n	n	5.38	3.74	0.97	3.28	y	0.75	1.47	1.3	580.2
558	任义华	女	53	63	1.54	26.56	120	n	n	n	n	n	n	5.74	2.37	1.71	3.14	y	0.47	1.32	1.29	117
559	董荷花	女	53	57.5	1.57	23.33	140	y	y	n	n	n	n	4.09	1.92	0.95	2.88	y	0.38	1.58	0.8	56.2
560	刘滨宏	男	53	68	1.64	25.28	127	n	n	n	n	n	n	5.47	1.5	1.08	3.42	n	0.65	1.43	1.3	207.3
561	卢凤瑛	女	53	58	1.58	23.23	158	n	n	n	n	n	n	4.24	1.7	1.24	2.71	n	0.34	1.39	1.24	18.8
562	姚玉利	男	53	77	1.8	23.77	130	n	n	n	n	n	n	5	1.47	1.34	4.06	n	0.29	1.24	1.17	350.6
563	张保华	男	53	65	1.6	25.39	123	n	n	n	y	n	n	3.63	1.09	0.97	2.09	y	0.22	1.08	0.71	61.5
564	徐天学	男	53	60	1.64	22.31	120	n	y	n	n	n	n	4.83	0.9	1.08	3.13	n	0.18	1.67	0.96	136.2
565	赵凤芝	女	53	44	1.52	19.04	102	n	n	n	n	n	n	3.08	1.36	0.82	1.86	y	0.27	1.02	0.64	147.7
566	张铭	男	53	62	1.68	21.97	125	n	n	n	n	n	n	4.9	0.34	1.75	2.89	n	0.07	1.13	0.67	65.5
567	鲁艳荣	女	53	55	1.6	21.48	115	n	n	n	n	n	n	4.9	0.95	1.71	3.79	n	0.19	1.25	1.01	64.2
568	任义华	女	53	45	1.54	18.97	128	n	n	n	n	n	n	4.99	0.72	1.79	2.99	n	0.14	1.29	0.89	43
569	徐恒海	男	53	80	1.74	26.42	111	n	n	n	n	n	n	4.07	1.17	0.79	2.56	y	0.23	1.36	1.07	221.7
570	许承忠	男	53	85	1.8	26.23	133	n	n	n	n	n	n	5.06	1.21	1.42	3.18	n	0.24	1.14	0.88	201.4
571	高文	男	53	67	1.65	24.61	93	n	y	y	n	n	n	3.24	0.73	1.25	1.97	n	0.15	1.17	0.81	47.7
572	杨宇	男	54	57.5	1.67	20.62	132	y	y	n	n	n	n	3.99	0.65	1.55	2.46	n	0.13	1.28	0.88	108.4
573	李忠君	男	54	71	1.74	23.45	140	y	y	y	n	n	n	3.41	0.62	1.23	1.86	n	0.12	1.16	0.69	147
574	郑延庆	男	54	60.5	1.78	19.09	115	n	n	n	n	n	n	3.87	0.81	0.83	2.3	y	0.16	1	0.81	65.2
575	安菊	女	54	60	1.55	24.97	129	n	n	n	n	n	n	3.62	1.58	0.97	2.19	y	0.32	1.3	0.67	286.4
576	窦立祥	男	54	60	1.72	20.28	123	n	n	n	n	n	n	3.88	0.5	0.99	2.24	y	0.1	1.09	0.7	303.6
577	李华伟	男	54	64	1.75	20.9	130	n	y	y	n	n	n	4.71	1.01	1.1	3.02	n	0.2	1.46	1.01	715.3
578	乔殿民	男	54	92	1.75	30.04	98	n	n	n	n	n	n	5	0.99	1.76	3.43	n	0.2	1.13	1.07	205.5
579	乔殿民	男	54	92	1.75	30.04	98	n	n	n	n	n	n	3.9	1.18	0.95	2.27	y	0.24	1.18	0.84	61.4
580	杨惠娟	女	54	67	1.66	24.31	132	y	n	n	n	n	n	5.63	0.87	1.67	3.5	n	0.17	1.44	1.04	469.2
581	杨桂兰	女	55	60	1.5	26.67	148	y	n	n	n	n	n	4.15	1.24	1.3	2.78	n	0.25	1.21	0.85	97.1
582	张淑玲	女	55	76	1.62	28.96	140	y	n	y	n	n	n	4.05	2.07	1.52	2.17	n	0.41	1.26	0.69	133.3
583	洪晓霞	女	55	63	1.64	23.42	147	y	y	y	n	n	n	6.62	0.66	1.92	4.56	y	0.13	1.42	1.26	262.6
584	赵金炎	男	55	69	1.7	23.88	146	y	n	n	y	n	n	4.15	0.56	1.18	2.73	n	0.11	1.08	0.92	59.5
585	徐雪芳	女	55	65	1.68	23.03	130	y	n	n	n	n	n	3.99	1.01	1.21	2.6	n	0.2	1.08	0.81	79.1
586	张荣华	女	55	57	1.7	19.72	150	n	n	n	n	n	n	4.75	2.08	1.07	3.1	n	0.42	1.11	0.93	202.7
587	张桂香	女	55	57	1.6	22.27	120	n	n	n	n	n	n	3.75	1.73	0.86	2.48	y	0.35	0.91	0.83	94.3
588	黄爱荣	女	55	71	1.65	26.08	133	n	n	n	n	n	n	3.88	1.19	1.18	2.54	n	0.24	1.1	0.8	32.9
589	王亚杰	女	55	78	1.74	25.76	165	n	n	n	y	n	n	4.53	1.87	1.03	2.76	y	0.37	1.22	0.81	203.3
590	张杰	男	55	65	1.7	22.49	156	y	y	y	y	n	n	4.42	1.18	1.5	2.58	n	0.24	1.09	0.8	57.3
591	马爱国	男	55	80	1.8	24.69	143	n	y	y	n	n	n	5.54	1.18	1.28	3.4	n	0.24	1.24	1	213.5
592	于学发	男	56	67	1.6	26.17	147	y	n	n	n	n	n	3.4	1.31	1.3	2.1	n	0.26	0.91	0.77	223.6
593	刘玉全	男	56	60	1.7	20.76	190	y	y	y	y	n	n	5.08	0.71	1.77	3.05	n	0.14	1	0.89	429.7
594	韩国忠	男	56	70	1.78	22.09	114	n	n	n	n	n	n	3.76	0.57	1.16	2.41	n	0.11	1.33	0.7	426
595	孙柏庆	男	56	86	1.7	29.76	146	y	y	n	n	n	n	4.85	4.72	1	3.11	y	0.94	1.17	0.89	42.4
596	李和平	女	56	66	1.6	25.78	130	y	n	n	n	n	n	5.29	1.25	1.06	3.86	n	0.25	1.24	1.15	113.6
597	许传菊	男	56	64	1.61	24.69	126	n	n	n	n	n	n	4.52	1.25	0.96	3.31	y	0.25	1.3	0.89	101.1
598	滕盛海	男	56	90	1.78	28.41	95	y	n	n	n	n	n	3.7	1.27	0.78	2.39	y	0.25	1.17	0.86	74.5
599	刘艳敏	女	56	60	1.58	24.03	158	y	y	n	y	n	n	5.52	1.3	0.86	3.62	y	0.26	1.36	1.24	2.4
600	吕凤云	女	56	60	1.5	26.67	136	n	n	n	n	n	n	4.75	0.96	1.52	2.78	n	0.19	1.25	0.82	76.1
601	陈旭	男	56	90	1.74	29.73	140	n	n	n	n	n	n	5.07	2.17	1.25	2.97	n	0.43	1.29	0.98	63.5
602	于高连	男	56	68	1.64	25.28	131	n	n	n	n	n	n	3.83	1.34	0.9	2.53	y	0.27	1.21	0.86	15.2
603	夏立华	女	57	72	1.6	28.13	112	n	n	n	n	n	n	3.86	2.58	0.82	2.25	y	0.52	1.26	0.82	42
604	薛勇	男	57	78	1.67	27.97	152	y	n	y	n	n	n	5.15	4	0.98	3.38	y	0.8	1.4	1.16	80.3
605	焦成发	男	57	80	1.78	25.25	188	y	n	n	y	n	n	4.91	1.07	1.14	3.24	n	0.21	1.1	0.94	233.6
606	田宪梅	女	57	50	1.65	18.37	120	n	n	n	n	n	n	5.2	1.66	1.5	3.68	n	0.33	1.42	0.98	226.2
607	刘树林	男	57	73	1.65	26.81	148	n	y	n	n	n	n	3.44	0.56	1.1	2.42	n	0.11	0.84	0.65	21.9
608	王志伟	男	57	74	1.7	25.61	129	n	n	n	n	n	n	3.32	3.49	0.74	2.02	y	0.7	1.21	0.8	21.9
609	李宝玉	男	57	56	1.62	21.34	115	n	n	n	n	n	n	4.53	1.78	1.01	2.76	y	0.36	0.92	0.86	153.1
610	李淑云	女	58	59	1.6	23.05	139	y	n	n	n	n	n	5.38	0.69	1.37	3.69	n	0.14	1.49	1.05	13.9
611	赵泽岩	男	58	85	1.75	27.76	131	y	y	y	n	n	n	4.82	1.58	1.26	3.17	n	0.32	1.37	1.01	267.8
612	于美兰	女	58	44	1.52	19.04	137	n	n	n	n	n	n	5.18	0.95	2.11	2.55	n	0.19	1.61	0.88	20.1
613	李全城	男	58	66	1.72	22.31	130	n	n	n	n	n	n	5.47	1.03	1.24	3.51	n	0.58	1.29	1.2	157.9
614	郭茹萍	女	58	55	1.58	22.03	132	n	n	n	n	n	n	3.21	0.57	1.17	1.84	n	0.11	0.79	0.6	13.4
615	段志敏	男	58	85	1.76	27.44	154	y	n	n	y	n	n	4.56	1.18	1.59	3	n	0.24	1.35	0.77	121.85
616	闵凡章	男	58	70	1.77	22.34	123	n	y	y	n	n	n	3.92	1.54	0.99	2.69	y	0.31	0.86	0.81	344.5
617	何国庆	男	59	70	1.67	25.1	132	y	n	n	n	n	n	3.99	0.69	1.34	2.26	n	0.12	0.98	0.69	79.7
618	刘海生	男	59	70	1.75	22.86	127	y	y	n	y	n	n	3.54	0.62	1.28	1.81	n	0.12	1.09	0.7	27.3
619	王忠民	男	59	84	1.84	24.81	145	y	n	n	y	n	n	3.29	0.73	1.31	1.63	n	0.15	1	0.57	2
620	曹玉华	女	59	68	1.6	26.56	155	y	n	n	n	n	n	3.22	0.88	1.24	1.47	n	0.18	0.95	0.66	101.5
621	常桂玲	男	59	50	1.58	20.03	122	n	n	n	n	n	n	4.63	0.87	1.22	3.38	n	0.17	0.95	0.93	121.2
622	董玉海	男	59	71	1.73	23.72	112	n	y	n	n	n	n	4.68	0.39	1.17	3.03	n	0.08	1.29	0.95	13
623	陈广廉	男	59	87	1.76	28.09	120	y	y	n	n	n	n	4.18	0.94	1.19	2.7	n	0.19	0.91	0.84	242.9
624	仲久祥	男	59	87	1.8	26.85	153	y	n	n	n	n	n	3.47	0.38	1.31	2.3	n	0.08	1.19	0.6	545.3
625	苗淑贤	男	59	65	1.63	24.46	131	n	n	n	n	n	n	4.54	1.58	1.09	2.87	n	0.32	1.03	0.91	471.18
626	张滨花	女	60	105	1.6	41.02	179	y	n	n	y	n	n	4.38	0.74	1.25	2.77	n	0.15	1.38	0.99	407.8
627	李文明	男	60	60	1.68	21.26	152	y	y	y	n	n	n	4.14	1.05	1.11	2.53	n	0.21	1.16	0.86	86.5
628	南继学	男	60	70	1.7	24.22	106	y	n	n	y	n	n	2.7	1.35	1.25	1.55	y	0.27	0.87	0.62	349.8
629	韩晓梅	女	60	67	1.58	26.84	139	y	n	n	n	n	n	4.97	1.02	1.91	2.65	n	0.2	1.09	0.92	180.5
630	王守信	男	60	70	1.66	25.4	149	y	y	y	y	n	n	3.28	1.18	0.64	2.52	y	0.24	1.16	0.91	280.2
631	徐军	男	60	71	1.67	25.46	140	y	n	n	n	n	n	3.54	1.21	0.82	2.26	y	0.24	0.99	0.79	14
632	张继君	男	60	74	1.7	25.61	117	n	n	n	n	n	n	4.51	1.36	0.95	2.95	y	0.27	1.04	0.98	1.2
633	叶树春	男	60	71	1.7	24.57	126	n	n	n	n	n	n	3.73	0.43	1.21	2.42	n	0.09	1.09	0.61	24.7
634	张福才	男	60	92	1.76	29.7	128	y	y	y	n	n	n	3.61	0.85	1.06	2.42	n	0.17	1.44	0.79	14.2
635	叶树春	男	60	75	1.7	25.95	164	n	n	n	y	n	n	4.37	0.73	1.21	2.84	n	0.15	1.5	0.92	108
636	阴忠海	男	60	85	1.76	27.44	128	n	n	n	n	n	n	4.66	0.53	1.19	2.84	n	0.11	1.08	0.84	80.4
637	袁微微	女	16	65	1.62	24.77	122	n	n	n	n	n	n	3.73	0.74	1.13	2.15	n	0.15	0.93	0.82	74.4
638	周剑晨	女	16	114	1.8	35.19	116	y	n	n	n	n	n	3.18	1.1	1.22	2.21	n	0.22	1.03	0.83	148.6
639	孟凡智	男	16	66	1.73	22.05	105	n	n	n	n	n	n	2.62	1.05	0.68	1.99	y	0.21	0.96	0.55	8.1
640	尚庆达	男	16	75	1.75	24.49	123	n	n	n	n	n	n	3.45	0.93	0.88	1.93	y	0.19	1.25	0.63	107
641	李文博	男	16	65	1.81	19.84	135	n	n	n	n	n	n	4.63	0.79	1.48	2.75	n	0.16	0.88	0.75	96.6
642	梁昊	男	16	69	1.73	23.05	135	y	n	n	n	n	n	3.8	0.96	1.07	0.61	n	0.19	0.89	0.86	55.6
643	肖毅	男	16	67	1.73	22.39	122	n	n	n	n	n	n	3.57	0.59	0.76	2.25	y	0.12	0.97	0.67	61.6
644	金成	男	16	77	1.69	26.96	144	n	n	n	n	n	n	3.91	1.25	0.82	2.47	y	0.25	1.35	0.71	18.9
645	李洋	男	16	85	1.76	27.44	120	n	n	n	n	n	n	3.73	0.59	1.04	2.44	n	0.12	1.3	0.66	204.7
646	邓积业	男	16	70	1.83	20.9	134	n	n	n	n	n	n	5.24	1.01	1.28	3.59	n	0.2	1.25	1.04	33.1
647	于默然	男	16	60	1.76	19.37	98	n	n	n	n	n	n	4.58	1.16	0.93	3.18	y	0.23	1.36	0.71	32.3
648	李乐阳	男	16	60	1.74	19.82	118	n	n	n	n	n	n	3.06	0.6	1.26	1.92	n	0.12	0.96	0.5	110.2
649	关雅宁	女	20	49	1.61	18.9	147	y	y	y	n	n	n	4.29	0.42	1.7	2.24	n	0.08	0.82	0.64	20.2
650	李梦园	女	20	55	1.62	20.96	120	n	n	n	n	n	n	3.27	0.84	1.13	1.73	n	0.17	1.12	0.57	59.8
651	松培蕊	女	20	44	1.58	17.63	108	n	n	n	n	n	n	3.51	0.53	1.24	2.16	n	0.11	1.11	0.59	39.9
652	辛明羽	男	20	70	1.8	21.6	120	n	n	n	n	n	n	4.07	0.49	1.14	2.32	n	0.1	1.34	0.7	125.5
653	田苗苗	男	20	50	1.59	19.78	120	n	n	n	n	n	n	5.3	1.54	1.08	3.89	n	0.31	1.23	0.91	405.8
654	江鹏飞	男	21	118	1.94	31.35	138	y	n	n	n	n	n	4.14	1.1	1.31	2.73	n	0.22	1.31	0.87	362.2
655	王雪松	男	21	60	1.68	21.26	109	n	n	n	n	n	n	3.11	1	1.31	1.67	n	0.2	1.31	0.8	119.3
656	朴正植	男	21	70	1.73	23.39	117	n	n	n	n	n	n	3.68	2.29	0.9	2.37	y	0.46	1.34	0.85	97.1
657	刁金爽	女	21	51.5	1.63	19.38	130	n	y	n	n	n	n	2.89	1.21	0.83	1.84	y	0.24	1.03	0.65	55.2
658	宋爽	男	21	80	1.7	27.68	122	n	n	n	n	n	n	4.17	0.91	1.23	2.49	n	0.18	1.12	0.73	460.5
659	关依峰	男	22	120	1.9	33.24	144	y	n	n	n	n	n	3.92	1.7	1.14	2.58	n	0.34	1	0.77	151.8
660	张厚宇	男	22	83	1.73	27.73	117	n	n	y	n	n	n	3.18	0.87	1.26	1.37	n	0.17	1.29	0.68	61.3
661	李桐	女	22	60	1.65	22.04	131	n	n	n	n	n	n	3.56	0.72	1.16	2.36	n	0.14	1.1	0.72	262.8
662	孙璇	男	22	62	1.8	19.14	116	n	n	n	n	n	n	3.09	1.47	0.94	2.19	y	0.29	1.07	0.63	44.6
663	刘雨哲	男	23	75	1.78	23.67	130	y	n	y	n	n	n	3.7	0.68	1.11	2.29	n	0.14	1.14	0.74	43
664	张震天	男	23	85	1.71	29.07	130	y	y	n	n	n	n	3.76	1.12	1.22	2.09	n	0.22	1.13	0.81	69.3
665	张雅丽	女	23	48	1.65	17.63	119	n	n	n	n	n	n	3.62	0.58	1.39	1.97	n	0.12	1.1	0.62	211.6
666	王东睿	男	23	67	1.78	21.15	127	n	y	n	n	n	n	3.84	0.51	1.31	2.3	n	0.1	0.89	0.7	297.3
667	崔鹤	男	23	96	1.76	30.99	139	n	y	y	n	n	n	4.95	1.6	1.31	3.42	n	0.32	1.16	0.87	107.5
668	国亮	男	23	67	1.86	19.37	121	n	n	n	n	n	n	2.94	1.77	0.73	1.99	y	0.35	1.14	0.66	256.5
669	姜雪	女	23	63	1.62	24.01	109	n	n	n	n	n	n	3.49	0.68	1.26	2.13	n	0.14	0.87	0.7	174.1
670	金庆楠	男	23	70	1.72	23.66	130	n	n	n	n	n	n	4.08	1.52	0.96	2.5	y	0.3	1.17	0.81	49.2
671	李怡	女	23	53	1.7	18.34	128	n	n	n	n	n	n	3.35	0.68	0.7	2.3	y	0.14	1	0.54	118.5
672	王佳宁	女	24	53.5	1.65	19.65	119	n	n	n	n	n	n	4.87	1.13	1.47	2.94	n	0.23	1.34	0.92	90.5
673	王鑫	男	24	72	1.73	24.06	106	n	y	y	n	n	n	3.71	1.01	1.4	1.99	n	0.2	1.04	0.58	10.8
674	马涛	女	24	46	1.7	15.92	113	n	n	n	n	n	n	4.9	0.53	1.31	3.88	n	0.11	1.09	1.03	124.5
675	邵梦蝶	女	24	52	1.58	20.83	131	n	n	n	n	n	n	4.91	0.34	1.64	2.95	n	0.07	1.25	0.77	53.3
676	王进宇	男	24	82	1.78	25.88	128	n	y	n	n	n	n	5.3	1.09	1.1	3.57	n	0.22	1.33	1.2	83
677	王梦婷	男	24	56	1.7	19.38	118	n	n	n	n	n	n	3.73	0.52	1.63	2.17	n	0.1	1.2	0.66	59
678	宋宁	男	24	51	1.52	22.07	121	n	n	n	n	n	n	4.65	0.67	1.55	2.82	n	0.13	1.37	0.71	135.1
679	杨贺	女	25	52	1.65	19.1	118	n	n	n	n	n	n	3.97	1.23	1.23	2.32	n	0.25	1.19	0.64	141.5
680	高艳艳	女	25	54	1.65	19.83	116	n	n	n	n	n	n	4.52	0.56	1.58	2.65	n	0.11	1.11	0.74	20.2
681	卢艳秋	女	25	51	1.65	18.73	110	n	n	n	n	n	n	3.81	1.34	0.99	2.35	y	0.27	1	0.72	128.5
682	刘洋	女	26	60	1.65	22.04	120	n	n	y	n	n	n	3.32	0.56	1.33	2.02	n	0.11	1.12	0.69	29.2
683	张志鹏	男	26	52	1.7	17.99	112	n	n	y	n	n	n	3.74	0.56	1.19	2.05	n	0.11	1.24	0.7	118.5
684	马旭莹	女	26	61	1.65	22.41	125	n	n	n	n	n	n	4.13	0.62	1.17	2.55	n	0.12	1.1	0.83	37.7
685	刘天枢	男	26	66	1.66	23.95	99	n	n	n	n	n	n	5.05	1.79	1.66	2.77	n	0.36	1.33	0.98	101.9
686	刘海祥	男	26	68	1.7	23.53	110	n	n	n	n	n	n	3.87	0.57	1.39	2.4	n	0.11	1.2	0.65	113.5
687	张艺璇	女	26	55	1.6	21.48	113	n	n	n	n	n	n	3.91	0.98	1.49	2.34	n	0.2	0.91	0.63	30
688	崔晓凤	女	27	65	1.55	27.06	129	n	n	n	n	n	n	4.72	1.64	1.32	2.83	n	0.33	1.26	0.96	11.6
689	史晓楠	女	27	91	1.62	34.67	124	n	n	n	n	n	n	3.16	1.12	1.31	1.99	n	0.22	0.91	0.61	44.7
690	陶艳超	男	27	78	1.75	25.47	112	n	n	n	n	n	n	2.91	1.29	1.1	1.74	n	0.26	1.12	0.7	105.7
691	康恒褡	男	27	62	1.7	21.45	130	n	n	n	n	n	n	4.77	1.54	0.76	3.02	y	0.31	1.2	0.93	79.5
692	刘麟	男	27	58	1.84	17.13	114	n	y	n	n	n	n	4.75	0.92	1.24	2.93	n	0.18	1.52	0.84	452.9
693	宫秀磊	女	27	55	1.58	22.03	102	n	n	n	n	n	n	4.21	1.69	0.94	2.8	y	0.34	0.79	0.71	115.2
694	赵佳栋	男	27	87	1.83	25.98	118	n	y	y	n	n	n	4.03	1.97	0.84	2.5	y	0.39	0.95	0.76	187.1
695	刘秋红	男	27	47	1.67	16.85	111	n	n	n	n	n	n	3.56	0.58	1.3	2.24	n	0.12	1.09	0.56	275.4
696	李立东	男	27	70	1.74	23.12	120	n	n	n	n	n	n	3.41	0.97	1.24	2.09	n	0.19	1.09	0.57	105.5
697	徐畅	女	28	59	1.67	21.16	117	n	y	n	n	n	n	3.94	0.78	1.22	2.31	n	0.16	0.78	0.76	20.2
698	乔健	男	28	54	1.68	19.13	98	n	y	n	n	n	n	3.15	0.72	1.32	1.99	n	0.14	1.01	0.67	207.6
699	张金凤	女	28	90	1.6	35.16	113	n	y	n	n	n	n	3.9	0.84	2.24	2.59	n	0.17	1.05	0.61	177.5
700	郑博文	男	28	82	1.82	24.76	130	n	n	n	n	n	n	4.48	0.63	1.02	2.97	y	0.13	0.9	0.88	212.1
701	陈雪枫	男	28	75	1.78	23.67	144	y	n	n	n	n	n	3.11	1.02	0.68	2.03	y	0.2	1.13	0.73	213.8
702	田旭	男	28	95	1.8	29.32	151	n	n	n	n	n	n	3.53	2.34	1.04	2.16	y	0.47	0.93	0.7	119.9
703	王强	男	29	74	1.73	24.73	128	n	n	n	n	n	n	3.74	0.78	1.17	2.23	n	0.16	1.08	0.73	133.1
704	梁爽	女	29	70	1.7	24.22	135	n	n	n	n	n	n	3.75	0.83	1.17	2.28	n	0.17	1.11	0.69	158.9
705	陈健民	男	29	70	1.77	22.34	122	n	n	n	n	n	n	4.84	0.81	1.31	3.23	n	0.16	1.07	0.91	96.6
706	徐尚	女	29	39	1.6	15.23	101	n	n	n	n	n	n	4.29	1.07	1.35	2.55	n	0.21	1.09	0.68	200
707	姜贺麒	男	29	62	1.7	21.45	121	n	n	n	n	n	n	3.61	0.89	1.15	2.07	n	0.18	0.97	0.68	26
708	高甜多	女	29	47	1.5	20.89	103	n	n	n	n	n	n	5.48	0.81	1.57	3.21	n	0.16	1.1	0.89	109.8
709	闫勇	男	29	62.5	1.78	19.73	131	n	n	n	n	n	n	3.88	0.89	1.18	2.24	n	0.18	1.05	0.6	97.4
710	王立彬	男	29	94	1.78	29.67	127	n	n	n	n	n	n	3.73	1.06	0.89	2.39	y	2.69	1.05	0.72	414.6
711	王立明	女	29	47	1.7	16.26	109	n	n	n	n	n	n	3.79	0.64	1.07	2.34	n	0.13	0.97	0.65	123.1
712	毕然	女	29	55	1.62	20.96	103	n	n	n	n	n	n	3.9	0.63	1.52	2.23	n	0.13	1	0.53	223
713	王舶	男	29	90	1.8	27.78	130	n	n	n	n	n	n	4.63	1.66	0.9	2.93	y	0.33	1.1	1.03	51.1
714	成芳	女	29	69	1.6	26.95	109	n	n	n	n	n	n	4.18	0.56	1.65	2.64	n	0.11	1.15	0.65	229.9
715	张楠	女	29	63	1.62	24.01	113	n	n	n	n	n	n	4.41	1.14	1.37	2.82	n	0.23	0.83	0.77	76.9
716	葛园园	女	29	80	1.72	27.04	103	n	n	n	n	n	n	3.43	0.43	1.2	2.08	n	0.09	0.92	0.47	63.6
717	陈婉瑶	女	29	60	1.72	20.28	98	n	n	n	n	n	n	4.03	0.68	1.29	2.59	n	0.14	0.98	0.85	173.3
718	朱琪	女	29	66	1.58	26.44	120	n	n	n	n	n	n	4.75	0.93	1.28	2.99	n	0.19	1	0.83	183.9
719	赵洪岩	女	30	53	1.65	19.47	129	n	n	n	n	n	n	4.06	1.32	1.23	2.42	n	0.26	1.08	0.93	193.1
720	刘洋	女	30	67	1.6	26.17	124	n	n	y	n	n	n	3.97	0.63	1.32	2.19	n	0.13	0.97	0.85	215.1
721	张驰	男	30	80	1.7	27.68	132	n	y	n	n	n	n	4.78	1.3	1.03	3.54	y	0.26	0.98	0.97	488.5
722	郭健	男	30	75	1.74	24.77	144	n	n	n	n	n	n	4.5	0.88	1.57	3.78	n	0.18	1.45	1.12	203.6
723	王中佳	男	30	57	1.64	21.19	106	n	n	n	n	n	n	2.59	0.65	1.16	1.37	n	0.13	0.81	0.41	69.8
724	姜艳秋	女	30	44	1.55	18.31	106	n	n	n	n	n	n	4.45	0.83	1.72	2.74	n	0.17	1.19	0.72	155.3
725	杜盛楠	女	30	55	1.6	21.48	110	n	n	n	n	n	n	3.98	0.87	0.92	2.48	y	0.17	0.81	0.79	459.1
726	郭慧	女	30	55	1.6	21.48	108	n	n	n	n	n	n	3.08	0.79	1.26	1.74	n	0.16	1	0.56	127.7
727	吴静	男	30	60	1.63	22.58	112	n	n	n	n	n	n	3.32	1.37	1.03	2.2	y	0.27	1.02	0.62	104.4
728	侯贵	男	31	58	1.65	21.3	126	n	n	y	n	n	n	3.56	1.37	1.34	2.05	n	0.27	1.26	0.78	296.7
729	高静	女	31	75	1.6	29.3	143	y	n	n	n	n	n	4.63	0.9	1.27	3.03	n	0.18	1.16	0.95	105
730	孙恺峰	男	31	65	1.65	23.88	146	y	n	n	n	n	n	4.27	0.69	1.57	2.58	n	0.14	1.4	0.78	311.6
731	谢俊峰	男	31	80	1.7	27.68	111	n	n	n	n	n	n	3.6	0.77	1.07	2.11	n	0.15	0.95	0.85	392.3
732	吴奇芮	女	31	69	1.65	25.34	110	n	n	n	n	n	n	3.78	1.01	0.92	2.54	y	0.2	1.02	0.75	217.5
733	姜春娟	女	31	54	1.55	22.48	112	n	n	n	n	n	n	3.89	1.66	0.79	2.96	y	0.33	1.63	0.87	188.8
734	余键	男	31	84.5	1.68	29.94	126	n	y	n	n	n	n	4.48	4.46	0.64	2.57	y	0.89	0.96	0.56	121
735	薛全斌	男	31	86	1.75	28.08	132	n	n	n	n	n	n	4.09	0.79	1.01	2.57	y	0.16	1.31	0.86	145.5
736	刘天智	男	31	61	1.7	21.11	114	n	n	n	n	n	n	4.77	1.29	1.11	2.93	n	0.26	1.04	0.91	123.6
737	孙慧敏	女	31	72	1.65	26.45	115	n	n	n	n	n	n	4.19	0.78	1.19	2.59	n	0.16	1.26	0.73	149
738	盛苍荣	男	31	75	1.75	24.49	128	n	n	n	n	n	n	4.92	1.72	1.06	3.03	n	0.34	1.03	0.96	187.6
739	孟祥宇	男	31	55	1.58	22.03	110	n	n	n	n	n	n	4.3	0.97	1.22	2.56	n	0.19	1.23	0.77	302.5
740	焦传君	男	61	65	1.7	22.49	137	y	y	y	n	n	n	4.29	1.14	1.23	2.85	n	0.23	1.23	0.9	311.2
741	翟向丽	女	61	59	1.69	20.66	171	y	n	n	y	n	n	4.16	1.04	1.11	2.66	n	0.21	1.47	0.83	285.2
742	李淑芬	女	61	65	1.58	26.04	156	y	n	n	y	n	n	4.01	1.73	0.88	3.17	y	0.35	1.21	1.02	342.9
743	明宝仲	男	61	56	1.6	21.88	113	n	y	n	n	n	n	4.05	0.79	0.91	2.71	y	0.16	1.04	0.9	117.8
744	范明禄	男	61	67	1.75	21.88	153	y	n	n	y	n	n	4.24	0.52	1.68	2.46	n	0.1	1.09	0.56	172.8
745	范秀婷	女	62	65	1.62	24.77	134	y	n	n	n	n	n	4.3	0.88	1.61	2.17	n	0.18	0.85	0.76	124.7
746	徐化成	男	62	85	1.78	26.83	149	y	n	y	n	n	n	3.86	1.87	1.28	2	n	0.37	1.2	0.66	308.6
747	王立强	男	62	75	1.73	25.06	137	y	y	n	n	n	n	4.13	1.38	1.33	2.63	n	0.28	1.09	1	89
748	盛淑珍	女	62	57	1.58	22.83	123	n	n	n	n	n	n	5.11	1.11	1.49	3.25	n	0.22	1.11	1.05	178.5
749	张燕	女	62	69	1.58	27.64	119	n	n	n	n	n	n	3.71	1.37	1.13	2.09	n	0.27	0.99	0.69	143.4
750	高鹏飞	男	62	90	1.8	27.78	123	n	n	n	n	n	n	4.72	1.53	1.42	3.14	n	0.31	1.66	1.11	156.2
751	栾立军	男	62	73	1.75	23.84	145	n	y	y	y	n	n	4.58	1.26	1.1	3.25	n	0.25	1.24	1.06	40.5
752	于文清	男	62	75	1.78	23.67	152	y	y	y	y	n	n	4.97	1.18	1.07	3.54	n	0.24	1.29	1.02	50.8
753	许景芝	男	62	68	1.65	24.98	121	n	n	n	n	n	n	3.38	0.98	1.2	2.03	n	0.2	0.84	0.65	86.6
754	史桂香	女	62	57	1.58	22.83	125	y	n	n	n	n	n	5.59	3.21	1.02	3.5	y	0.64	1.09	1.08	128.5
755	杨亚莲	女	62	48	1.55	19.98	167	y	n	n	n	n	n	4.91	0.67	1.84	2.83	n	0.13	1.31	0.76	148
756	侯新芬	女	62	65	1.64	24.17	160	n	n	n	y	n	n	5.7	0.91	1.36	3.61	n	0.18	1.28	1.06	239.4
757	金林	男	62	56	1.73	18.71	133	n	y	y	n	n	n	4.15	2.21	0.96	2.68	y	0.44	1.17	0.82	170.3
758	安方一	男	62	71	1.63	26.72	119	n	n	n	n	n	n	3.37	0.4	1.27	2.21	n	0.08	0.88	0.59	134.4
759	方亚杰	男	62	73	1.6	28.52	135	n	n	n	n	n	n	4.57	1.15	1.42	3	n	0.23	1.18	0.79	239.1
760	刘雅杰	女	63	70	1.6	27.34	111	n	n	n	n	n	n	3.69	0.92	1.55	1.97	n	0.18	1.13	0.79	88
761	刘树森	男	63	58	1.68	20.55	130	y	y	y	n	n	n	4.86	1.04	1.35	2.82	n	0.21	0.98	0.97	195.3
762	吕秀玲	女	63	55	1.5	24.44	131	y	n	n	n	n	n	4.41	0.86	1.24	2.73	n	0.17	1.36	0.82	189.4
763	付京朝	男	63	60	1.69	21.01	146	y	y	y	n	n	n	2.77	0.77	1.1	1.5	n	0.15	1.05	0.53	165.4
764	张肇千	男	63	75	1.72	25.35	168	y	y	n	y	n	n	4.29	0.7	1.21	2.74	n	0.14	1.15	0.84	201.3
765	李保林	男	63	80	1.74	26.42	157	y	n	n	y	n	n	4.16	0.75	1.36	2.74	n	0.15	0.92	0.82	243.2
766	单祥芝	女	63	56	1.6	21.88	136	n	y	n	n	n	n	3.39	1.52	0.96	2.03	y	0.3	1.11	0.66	172.7
767	孙秀云	女	63	81	1.6	31.64	144	n	n	n	n	n	n	5.46	2.17	0.94	4.4	y	0.43	1.44	1.37	188.8
768	陈继慧	男	63	62	1.77	19.79	105	n	n	n	n	n	n	4.11	0.97	1.12	2.34	n	0.19	1.39	0.75	252.2
769	彭珍玉	女	63	61	1.57	24.75	155	y	n	n	y	n	n	5.32	1.54	1.23	3.51	n	0.31	1.17	1.02	142
770	陈守卫	女	63	69	1.68	24.45	110	n	n	n	n	n	n	4.93	0.74	1.1	2.97	n	0.15	1.45	1.18	92.1
771	刘士龙	男	63	65	1.6	25.39	110	n	n	n	n	n	n	5.3	2.66	1.27	3.28	y	0.53	1.15	0.99	126.8
772	胡翠荣	女	63	60	1.55	24.97	128	n	n	n	n	n	n	5.37	0.69	1.44	3.4	n	0.14	1.35	0.93	459.9
773	魏胜培	男	63	62	1.64	23.05	144	n	n	n	n	n	n	5.27	1.91	1.2	3.54	n	0.38	1.15	1.11	260.2
774	张淑芝	女	63	63	1.58	25.24	128	n	n	n	n	n	n	4.05	2.12	1.33	2.6	n	0.42	1.09	0.7	168.4
775	朱长立	男	63	98	1.78	30.93	116	n	n	y	n	n	n	4.13	0.93	1.14	2.61	n	0.19	1.33	0.86	218.6
776	石丽芬	女	63	53	1.58	21.23	129	n	n	n	n	n	n	3.48	1.11	1.19	2.32	n	0.22	0.94	0.65	187
777	付安生	男	64	83	1.67	29.76	108	n	y	n	n	n	n	4.44	1.35	1.21	3.09	n	0.27	1.26	1.04	165.3
778	李忠全	男	64	90	1.76	29.05	155	y	n	n	n	n	n	5.11	3.83	0.83	3.37	y	0.77	1.25	1.14	147.1
779	曲学	男	64	62	1.74	20.48	137	y	n	y	n	n	n	4.12	1.1	1.24	2.94	n	0.22	1.4	0.99	188.7
780	杨加兴	男	64	80	1.73	26.73	136	y	n	y	n	n	n	3.77	1.94	1.23	2.39	n	0.39	1.3	0.84	243.1
781	徐爱萍	女	64	56	1.6	21.88	143	y	n	n	n	n	n	5.67	0.45	1.78	3.65	n	0.09	1.24	1.14	313.9
782	赵德玉	男	64	71.5	1.64	26.58	113	n	n	n	n	n	n	3.94	3.88	0.77	2.27	y	0.78	1.37	0.72	229.9
783	祁丽	女	64	60	1.55	24.97	167	y	n	n	y	n	n	6.16	1.36	0.96	3.88	y	0.27	1.42	1.38	260.8
784	贾玉春	男	64	58	1.66	21.05	145	n	y	n	n	n	n	4.38	1.23	0.93	2.7	y	0.25	0.89	0.83	259.9
785	邢本献	男	64	68	1.8	20.99	119	n	y	y	n	n	n	3.62	0.86	0.79	2.26	y	0.17	1.39	0.74	252.8
786	姚万财	男	65	75	1.7	25.95	140	n	n	n	n	n	n	4.62	2.39	0.93	3.16	y	0.48	1.77	0.96	523.5
787	徐国彬	男	65	68	1.76	21.95	150	y	n	n	n	n	n	4.79	1.56	1.48	3.04	n	0.31	1.36	1.08	211
788	于英春	男	65	82	1.73	27.4	139	n	n	n	n	n	n	4.76	1.01	0.81	3.16	y	0.2	1.58	1.01	144.6
789	于文清	男	65	63	1.69	22.06	118	n	n	n	n	n	n	3.05	0.84	0.75	1.93	y	0.17	1.22	0.63	208.3
790	李玉斌	男	65	79	1.73	26.4	139	n	n	n	n	n	n	4.12	1.41	1.03	2.58	y	0.28	1.18	0.74	209
791	关建秋	男	65	70	1.69	24.51	129	y	n	n	n	n	n	5.29	1.13	1.17	3.26	n	0.23	1.34	0.81	155.6
792	薛彩珍	女	66	55	1.6	21.48	181	y	n	n	y	n	n	5.28	1.33	1.4	3.33	n	0.27	1.25	1.19	273.5
793	张洪博	男	66	64	1.7	22.15	175	y	n	n	y	n	n	4.71	0.64	1.54	2.95	n	0.13	1.23	1.03	143
794	姚万财	男	66	80	1.7	27.68	132	n	n	n	n	n	n	4.58	1.91	1.44	3.13	n	0.38	1.11	0.93	188
795	杨立峰	男	66	70	1.75	22.86	117	n	y	n	n	n	n	3.84	0.69	1.37	2.23	n	0.14	1.16	0.82	241
796	张树彬	男	66	82	1.7	28.37	173	n	n	n	y	n	n	4.37	1.58	0.79	2.84	y	0.32	1.13	0.94	113
797	连海云	女	66	60	1.6	23.44	119	n	n	n	n	n	n	4.83	1.32	1.73	3.14	n	0.26	0.97	0.8	144
798	尹训全	男	66	67	1.6	26.17	152	n	y	n	n	n	n	4.56	1.95	0.8	2.95	y	0.39	1.1	1	153
799	孙元鏖	男	66	80	1.8	24.69	138	n	n	n	n	n	n	5.51	1.4	1.37	3.34	n	0.28	1.35	0.86	236
800	王文财	女	66	65	1.6	25.39	122	n	n	n	n	n	n	4.01	1.37	1.04	2.68	n	0.27	1.21	0.71	255
801	魏春山	男	66	76	1.72	25.69	123	n	n	n	n	n	n	4.12	1.67	1.08	2.36	n	0.33	1.18	0.76	144
802	吴培伦	男	66	73	1.76	23.57	130	n	n	n	n	n	n	4.42	0.92	1.01	2.66	y	0.18	1.38	0.84	184
803	高玉琴	女	66	60	1.62	22.86	110	n	n	n	n	n	n	4.53	1	1.2	2.65	n	0.2	1.16	0.78	115
804	刘锡明	男	66	55	1.65	20.2	156	y	y	n	n	n	n	4.18	1.11	0.89	3	y	0.22	1.52	0.93	93
805	张启常	男	66	63	1.7	21.8	108	n	n	n	n	n	n	4.06	1.49	0.88	2.77	y	0.3	1.52	0.83	114
806	宋顺成	男	67	74	1.78	23.36	145	y	n	y	n	n	n	4.09	0.92	1.21	2.35	n	0.18	1.36	0.76	170
807	李长海	男	67	71	1.72	24	162	y	n	n	y	n	n	4	0.97	1.05	2.35	n	0.19	1.54	0.84	11
808	解玉宏	男	67	50	1.7	17.3	146	y	n	y	n	n	n	3.7	0.42	1.16	2.12	n	0.08	1.34	0.78	190
809	朱立群	男	67	68	1.68	24.09	146	y	y	n	n	n	n	3.51	1.94	0.92	2.03	y	0.39	1.35	0.74	132
810	曹振山	男	67	70	1.65	25.71	142	n	n	n	n	n	n	6.32	0.76	1.55	4.84	y	0.15	1.25	1.22	184
811	包秀芝	女	67	55	1.63	20.7	116	n	y	y	n	n	n	3.81	1.25	0.78	3.13	y	0.25	1.44	1.05	187
812	付喜山	男	67	76	1.72	25.69	171	n	n	n	n	n	n	5.23	0.73	1.77	2.96	n	0.15	1.6	0.84	100
813	邵媛英	女	67	65	1.6	25.39	147	y	n	n	n	n	n	6.39	2.61	1.55	3.88	y	0.52	1.4	1.04	278
814	刘国强	男	67	60	1.65	22.04	104	n	y	n	n	n	n	4.59	1.32	0.97	3.01	y	0.26	1.19	0.89	89
815	关漪	女	67	69	1.62	26.29	134	n	n	n	n	n	n	5	0.64	1.39	3	n	0.13	1.15	0.84	266
816	赵凤海	男	67	54	1.65	19.83	146	n	n	n	n	n	n	4.4	0.91	1.05	2.67	n	0.18	1.05	0.91	189
817	陆生跃	女	67	81	1.64	30.12	140	n	n	n	n	n	n	4.28	0.94	1.01	2.7	y	0.19	0.94	0.78	316
818	王玉	男	67	70	1.71	23.94	117	n	n	n	n	n	n	4.89	1.27	0.83	3.07	y	0.25	1.36	1	125
819	赵克军	男	67	70	1.72	23.66	126	n	n	n	n	n	n	3.99	1.99	0.9	2.48	y	0.4	1.09	0.81	77
820	周长珍	女	67	70	1.6	27.34	133	y	n	n	n	n	n	4.47	1.07	0.99	2.69	y	0.21	1.1	0.93	144
821	齐永久	男	67	52	1.65	19.1	136	n	n	n	n	n	n	5.31	0.54	1.86	3.12	n	0.11	0.92	0.81	358
822	孔范儒	男	67	65	1.67	23.31	152	y	n	n	n	n	n	4.08	2.74	0.95	2.67	y	0.55	1.29	0.75	181
823	刘忠良	男	68	70	1.62	26.67	139	y	y	y	n	n	n	3.43	1.7	1.07	1.78	n	0.34	1.25	0.69	178
824	谢德栓	男	68	77	1.7	26.64	129	n	y	n	n	n	n	3.09	1.06	1.23	1.86	y	0.21	1.17	0.7	164
825	张传才	男	68	55	1.6	21.48	114	n	n	n	n	n	n	4.55	1.19	1.45	2.89	y	0.24	1.45	1.22	178
826	郎士勋	男	68	70	1.7	24.22	162	y	y	y	y	n	n	5.4	0.97	1.13	4.23	y	0.19	1.38	1.34	113
827	刘长清	男	68	55	1.7	19.03	148	n	n	n	n	n	n	4.6	0.61	1.32	2.85	n	0.12	1.17	0.87	215
828	徐树堂	男	68	65	1.7	22.49	128	n	y	y	n	n	n	4.2	2.93	1.1	2.67	y	0.59	1.36	0.81	179
829	王永庆	男	68	64	1.62	24.39	142	n	n	n	n	n	n	5.05	1.71	0.89	3.45	y	0.34	1.77	1.08	276
830	顾贤	男	68	55	1.68	19.49	153	n	n	n	n	n	n	3.91	1.67	0.96	2.83	y	0.33	1.51	0.85	295
831	张庆华	男	69	68	1.69	23.81	121	n	n	n	n	n	n	3.54	1.46	1.31	2.23	y	0.29	0.99	0.9	148
832	季宇	男	69	68	1.4	34.69	127	n	n	n	n	n	n	3.94	1.49	1.1	2.3	n	0.3	1.4	0.94	230
833	翟凤荣	男	69	56	1.72	18.93	144	n	y	n	n	n	n	4.31	1.74	0.81	2.73	y	0.35	1.39	0.92	258
834	铁生	男	69	70	1.76	22.6	128	n	y	y	n	n	n	5.57	0.87	1.7	3.72	n	0.17	1.36	1	115
835	迟云程	男	69	75	1.8	23.15	156	y	n	n	y	n	n	5.5	1.68	1.16	3.49	n	0.34	1.27	1.15	181
836	王希兰	女	69	60	1.5	26.67	134	n	n	n	n	n	n	4.64	1.64	0.93	3.24	y	0.33	1.32	1.06	193
837	李明福	男	69	80	1.7	27.68	128	n	n	n	n	n	n	5.11	1	1.35	3.08	n	0.2	1.53	0.96	130
838	高英范	男	70	60	1.78	18.94	131	y	y	y	n	n	n	4.33	1.24	1.33	3.11	n	0.25	1.54	0.94	182
839	任万志	男	70	80	1.74	26.42	153	y	y	n	y	n	n	4.84	1.39	1.11	3.18	n	0.28	1.06	0.99	183
840	丁继峰	男	70	70	1.68	24.8	126	n	y	n	n	n	n	4.81	0.64	1.66	2.88	n	0.13	1.34	0.89	191
841	宋春华	男	70	69	1.63	25.97	139	y	n	n	n	n	n	5.42	1.18	1.15	3.95	n	0.24	1.29	1.09	160
842	王炳克	男	70	67	1.6	26.17	135	y	n	n	y	n	n	4.61	0.9	1.01	2.86	y	0.18	1.8	1.03	104
843	张俊利	男	70	64	1.76	20.66	143	y	n	n	n	n	n	2.8	0.77	0.64	2.33	y	0.15	1.23	0.91	111
844	徐德兴	男	70	58	1.7	20.07	110	n	n	n	n	n	n	4.9	0.97	1.95	3.96	n	0.19	1.2	1.09	237
845	张洪儒	男	70	65	1.68	23.03	150	n	n	n	n	n	n	3.56	0.76	1.14	2.34	n	0.15	1	0.68	247
846	张继民	男	71	64	1.72	21.63	145	y	n	n	n	n	n	3.75	0.86	1.23	2.18	n	0.17	1.54	0.82	199
847	纪庆君	男	71	69	1.58	27.64	171	y	y	n	y	n	n	4.56	1.39	1.21	2.75	n	0.28	1.27	0.91	212
848	康玉龙	男	71	65	1.7	22.49	138	y	n	y	n	n	n	4.49	1.58	1.43	2.63	n	0.32	1.19	0.83	248
849	潘德贵	男	71	68	1.71	23.26	153	y	y	n	y	n	n	3.95	1.09	1.35	2	n	0.22	1	0.7	218
850	王金元	男	71	90	1.72	30.42	176	y	n	n	y	n	n	3.24	1.4	1.23	1.68	n	0.28	1.31	0.72	200
851	于云龙	男	71	70	1.73	23.39	144	n	y	y	n	n	n	3.65	1.29	0.88	2.4	y	0.26	1.55	1.02	300
852	韩荣祥	男	71	70	1.65	25.71	127	n	n	n	n	n	n	4.72	1.84	1.13	2.98	n	0.37	1.29	0.94	232
853	高贵明	男	71	65	1.7	22.49	116	n	n	n	n	n	n	4.99	1.04	1.08	3.14	n	0.21	1.32	1	188
854	张进飞	男	71	70	1.68	24.8	123	n	n	n	n	n	n	4.14	0.93	0.98	2.81	y	0.19	0.97	0.88	268
855	潘宝珍	男	72	55	1.72	18.59	165	y	n	n	y	n	n	3.28	0.92	0.9	1.97	y	0.18	1.18	0.75	217
856	陈孝钿	男	72	75	1.78	23.67	142	n	n	n	n	n	n	3.45	1.8	0.66	2.05	y	0.36	1.05	0.84	164
857	李拙	男	72	63	1.7	21.8	123	n	n	n	n	n	n	3.75	0.67	0.92	2.35	y	0.13	1.16	0.71	234
858	朱凤友	男	72	55	1.71	18.81	110	y	n	n	n	n	n	4.88	0.88	1.13	3.09	n	0.18	1.5	1.02	197
859	王德民	男	72	60	1.73	20.05	112	n	n	n	n	n	n	4.98	1.37	1.17	3.3	n	0.27	1.37	1	180
860	刘忠义	男	72	55	1.72	18.59	151	n	n	n	n	n	n	5.05	0.63	1.31	3.15	n	0.13	1.4	0.93	81
861	段春志	男	72	75	1.72	25.35	143	n	n	n	n	n	n	3.64	0.92	0.96	2.32	y	0.18	1.33	0.82	95
862	滕振勇	男	72	80	1.68	28.34	166	n	n	n	y	n	n	3.88	1.24	1.05	2.41	n	0.25	1.62	0.82	293
863	崔天江	男	72	80	1.7	27.68	159	n	n	y	y	n	n	5.07	0.45	1.37	3.5	n	0.09	1.24	1	208
864	陈国栓	男	72	59	1.65	21.67	162	y	n	n	y	n	n	4.86	0.96	1.24	3.01	n	0.19	1.41	0.81	233
865	候守池	男	73	90	1.73	30.07	113	n	y	n	n	n	n	3.39	0.88	1.16	1.72	n	0.18	1.3	0.66	183
866	王志和	男	73	58	1.57	23.53	146	y	y	y	n	n	n	5.17	1.78	1.13	3.6	n	0.36	1.34	1.25	179
867	段有坤	男	73	55	1.65	20.2	131	n	n	n	n	n	n	4.39	1.26	1.12	2.67	n	0.25	1.11	0.94	166
868	冯德龙	男	73	73.5	1.76	23.72	190	y	n	n	y	n	n	4.36	0.64	1.68	2.27	n	0.13	1.27	0.82	279
869	初真仕	男	73	73	1.72	24.68	125	y	n	n	n	n	n	5.21	2.33	0.87	3.81	y	0.47	1.71	1.25	50
870	吕付	男	73	65	1.71	22.23	145	y	n	n	n	n	n	4.08	0.54	1.24	2.4	n	0.11	1.31	0.67	222
871	马英轩	男	74	65	1.65	23.88	175	y	y	n	y	n	n	4.59	0.74	1.21	3.23	n	0.15	1.28	0.96	217
872	王明忠	男	74	47	1.66	17.06	117	n	n	n	n	n	n	3.56	0.96	0.83	2.45	y	0.19	0.96	0.66	200
873	姜延超	男	74	70	1.74	23.12	138	n	n	n	n	n	n	4.48	1.09	1.53	3.14	n	0.22	0.9	0.8	269
874	王潮湖	男	74	78	1.68	27.64	165	n	n	n	n	n	n	5	1.02	0.99	3.2	y	0.2	1.5	1.07	123
875	步祥	男	74	60	1.69	21.01	136	n	y	y	n	n	n	5.31	1.3	1.46	3.3	n	0.26	1.34	0.95	183
876	宁振国	男	75	92	1.76	29.7	174	y	n	n	y	n	n	5.31	0.78	1.41	3.22	n	0.16	1.31	1.09	250
877	王海贵	男	75	53	1.65	19.47	135	n	n	n	n	n	n	3.79	1.07	0.86	2.48	y	0.21	1.07	0.91	160
878	刘德良	男	75	76	1.65	27.92	143	y	y	n	y	n	n	3.91	0.94	1	2.46	y	0.19	1.13	0.85	159
879	张信	男	75	59	1.67	21.16	133	n	n	n	n	n	n	5.85	1.12	1.36	4.21	y	0.22	1.2	1.17	144
880	李忠	男	75	68	1.73	22.72	150	y	n	n	n	n	n	2.59	0.77	0.79	1.93	y	0.15	1.11	0.81	155
881	狄文章	男	75	54	1.65	19.83	161	y	y	y	y	n	n	3.72	1.39	1.16	2.27	n	0.28	1.12	0.69	258
882	赵洪山	男	76	70	1.7	24.22	137	y	n	n	n	n	n	4.98	0.59	1.31	3.18	n	0.12	1.41	0.97	263
883	王宝洪	男	76	51	1.65	18.73	131	n	n	n	n	n	n	3.33	0.56	1.11	2.2	n	0.11	0.87	0.66	135
884	董明生	男	77	60	1.6	23.44	144	y	n	n	n	n	n	3.31	0.99	1.07	1.55	n	0.2	1.27	0.78	63.22
885	田兴华	男	77	71	1.7	24.57	128	y	n	n	n	n	n	3.13	0.56	1.09	1.31	n	0.11	0.9	0.52	49.47
886	朱喜	男	77	67	1.65	24.61	122	y	n	n	n	n	n	4.29	1.15	0.97	2.65	y	0.23	1.16	0.83	388.5
887	李文山	男	78	65	1.6	25.39	163	n	n	n	y	n	n	3.66	0.82	1.05	2.32	n	0.16	1.38	0.82	174.5
888	方玉昌	男	79	73	1.7	25.26	129	n	n	n	n	n	n	3.75	0.56	1.32	2.18	n	0.11	1.63	0.85	125.16
889	杨彬	男	79	65	1.6	25.39	141	y	n	n	n	n	n	4.32	1.68	1.11	3.23	n	0.34	1.1	1.06	13.61
890	许文浩	男	79	45	1.3	26.63	115	n	n	n	n	n	n	3.76	1.49	0.84	2.37	y	0.3	1.27	0.8	171.3
891	彭钰航	男	79	62	1.5	27.56	100	n	n	n	n	n	n	3.98	0.58	1.16	2.4	n	0.12	1.32	0.83	341.5
892	张铭轩	男	79	68	1.7	23.53	95	n	n	n	n	n	n	7.27	2.36	1.63	4.38	y	0.47	1.53	1.31	71.9
893	关德福	男	79	49	1.68	17.36	138	n	y	y	n	n	n	5.82	1.12	1.27	3.72	y	0.22	1.82	1.19	75.92
894	任守禄	男	80	61	1.72	20.62	120	y	n	n	n	n	n	4.4	0.82	1.58	2.1	n	0.16	1.24	0.76	174.53
895	刘兆义	男	80	54	1.65	19.83	142	y	n	n	n	n	n	3.38	1.3	0.68	2.21	y	0.26	1.53	0.85	108.6
896	张传珉	男	81	75	1.73	25.06	123	n	n	n	n	n	n	4.7	1.56	0.82	2.89	y	0.31	1.43	0.92	172.7
897	王庆增	男	81	80	1.8	24.69	133	n	n	n	n	n	n	4.53	1.37	1.46	2.59	n	0.27	1.14	0.73	228.7
898	王兆久	男	82	60	1.67	21.51	138	n	n	n	n	n	n	4.19	1.44	0.86	2.64	y	0.29	1.3	0.98	296.2
899	刘财	男	82	66	1.63	24.84	110	n	n	n	n	n	n	3.45	0.82	0.75	2.23	y	0.16	1.34	0.8	283.1
900	崔永巨	男	82	65	1.7	22.49	153	n	n	n	n	n	n	5.01	0.98	1.23	3	n	0.2	1.22	0.88	190.9
901	么洪起	男	82	70	1.76	22.6	175	y	n	n	y	n	n	5.04	3.38	0.84	2.98	y	0.68	1.29	1.05	108.7
902	韩世清	男	82	60	1.72	20.28	150	y	n	n	n	n	n	3.9	0.87	1.34	2.38	n	0.17	1.25	0.73	176.56
903	牛广仲	男	83	70	1.7	24.22	178	n	n	n	y	n	n	3.47	0.93	0.77	2.18	y	0.19	1.17	0.77	102
904	刘凤章	男	83	59	1.7	20.42	88	n	n	n	n	n	n	5.61	0.69	1.65	3.71	n	0.14	1.45	1.21	85.8
905	贲庆发	男	84	60	1.72	20.28	134	n	n	n	n	n	n	4.53	1.48	1.18	3.04	n	0.3	1.38	0.94	51.5
906	刘传孝	男	85	57	1.65	20.94	112	n	n	y	n	n	n	4.94	1.94	1.07	3.04	n	0.39	1.17	1.08	157.9
907	丁玉才	男	85	57	1.74	18.83	132	y	y	n	n	n	n	5.07	0.5	1.47	3.19	n	0.1	1.59	0.85	110.2
908	逯长春	男	85	61	1.7	21.11	150	n	n	n	n	n	n	3.78	0.53	0.99	2.4	y	0.11	1.36	0.8	90.5
909	闫萃林	男	86	60	1.66	21.77	158	n	n	n	y	n	n	4.91	1.17	0.88	3.54	y	0.23	1.51	1.16	369.8
910	刘自海	男	33	72	1.76	23.24	136	y	n	n	n	n	n	3.36	1.36	1.21	1.51	n	0.27	0.9	1.04	86.14
911	单玺竹	女	40	73	1.65	26.81	106	n	n	y	n	n	y	4.57	1	1.15	3.03	n	0.2	0.85	0.98	172.49
912	葛彪	男	43	73	1.7	25.26	151	y	y	n	n	n	n	5.07	3.16	0.96	3.27	y	0.63	1.02	1.13	287.23
913	梁树海	男	43	80	1.72	27.04	155	n	y	y	n	n	n	4.27	2.15	1.08	2.74	n	0.43	0.7	0.93	273.39
914	施伟	女	45	60	1.58	24.03	142	y	n	y	n	n	y	5.37	1.01	1.19	3.77	n	0.2	0.95	1.16	98.83
915	韩彦恒	男	46	77	1.74	25.43	130	y	n	n	n	n	y	6.14	0.91	1.2	4.49	y	0.18	1.31	1.43	48.63
916	李春阳	男	49	73	1.69	25.56	120	n	y	n	n	n	n	3.44	1.2	1.1	1.99	n	0.24	0.58	0.62	196.37
917	张艳秋	女	50	68	1.56	27.94	153	y	n	y	n	n	y	5.09	1.49	1.06	3.6	n	0.3	1.04	1.19	295.2
918	张艳秋	女	50	70	1.58	28.04	130	y	n	n	n	n	y	4.1	2.07	1.36	3.74	n	0.41	0.93	1.26	63.59
919	张一凡	女	52	70	1.63	26.35	150	y	n	n	n	n	y	6.63	1.95	1.17	4.21	y	0.39	1.08	1.39	161.3
920	李庆民	男	53	72	1.73	24.06	136	y	y	y	n	n	n	3.7	0.72	1.55	3.82	n	0.14	0.89	1.26	622.13
921	白喜印	男	54	75	1.75	24.49	160	y	n	n	n	n	n	4.84	1.83	1.38	3.3	n	0.37	0.98	1.27	112.26
922	陶志军	男	54	81	1.7	28.03	170	y	y	n	y	n	n	4.72	0.72	1.32	3.13	n	0.14	0.73	0.94	68.75
923	陈喜娟	女	56	48	1.55	19.98	112	n	n	n	n	n	y	5.64	1.88	1.4	3.72	n	0.38	0.79	1.17	243.1
924	王海军	男	56	71	1.65	26.08	138	y	n	n	n	n	y	4.25	1.93	1.1	2.25	n	0.39	0.69	0.86	183.53
925	陈丽君	女	57	55	1.57	22.31	130	y	n	n	n	n	y	5.09	2.21	0.58	3.48	y	0.44	1.07	1.28	154.33
926	王亚林	男	58	80	1.64	29.74	156	y	y	n	y	n	y	4.21	0.99	1.22	2.73	n	0.2	0.8	0.95	64.33
927	卢琦	女	27	80	1.7	27.68	110	n	y	n	n	n	y	3.83	0.83	1.23	2.4	n	0.17	0.85	1.05	85.56
928	刘继明	男	62	67	1.72	22.65	172	y	y	y	y	n	y	4.19	1.25	1.06	2.53	n	0.25	0.82	0.88	359.37
929	陈继慧	男	63	66	1.75	21.55	141	y	n	n	n	n	y	5.51	2.24	1.02	4.18	y	0.45	1.09	1.24	135.94
930	王汉玉	男	63	62	1.75	20.24	160	n	n	y	y	n	y	4.32	1.71	1.51	2.9	n	0.34	0.87	0.89	127.36
931	毕景芝	女	63	58	1.63	21.83	122	y	n	n	y	n	y	6.1	1.71	1.53	4.38	y	0.34	1	1.11	108.73
932	崔凤云	女	64	67	1.55	27.89	158	y	n	n	y	n	y	3.73	1.53	1.33	2.54	n	0.31	0.86	0.87	50.96
933	朱喜财	男	65	70	1.7	24.22	170	y	n	n	y	n	y	6.22	2.35	1.28	4.15	y	0.47	1.29	1.42	25.65
934	高景龙	男	67	65	1.68	23.03	150	n	y	y	n	n	y	5.14	0.96	1.15	3.69	n	0.19	0.68	1.19	238.9
935	周梦雨	女	19	45	1.5	20	97	n	n	n	n	n	n	4.69	1.27	1.05	2.76	n	0.25	0.84	0.86	19
936	王天琦	女	21	80	1.68	28.34	147	y	n	n	n	n	n	4.61	1.69	1.46	2.98	n	0.34	0.96	1.02	22.8
937	金龙	男	32	63	1.72	21.3	113	n	y	y	n	n	n	4.77	1.15	1.19	2.91	n	0.23	0.8	0.82	246.2
938	孟伟江	男	33	70	1.86	20.23	108	n	y	y	n	n	n	5.44	1.81	1.04	3.51	n	0.74	1.09	1.17	31.6
939	于立刚	男	33	68	1.72	22.99	127	n	n	n	n	n	n	5.24	0.73	1.6	3.02	n	0.15	0.54	0.91	184.6
940	马志新	男	33	65	1.63	24.46	113	n	n	n	n	n	n	4.65	0.59	1.08	2.85	n	0.12	0.91	0.93	72.9
941	袁昊旻	男	34	72	1.7	24.91	125	n	y	n	n	n	n	5.05	1.29	0.91	3.51	y	0.26	0.99	1.08	65.8
942	魏岩	男	34	75	1.72	25.35	131	n	y	y	n	n	n	4.95	1.12	0.94	3.19	y	0.22	0.95	1	62.4
943	孙志华	男	34	75	1.69	26.26	120	n	n	n	n	n	n	4.03	1.97	1.05	2.47	n	0.39	0.54	0.81	48
944	许世龙	男	35	70	1.83	20.9	134	n	n	n	n	n	n	4.3	0.94	1.23	2.93	n	0.19	0.64	1.05	130.5
945	倪武强	男	35	97	1.82	29.28	140	n	n	n	n	n	n	4.4	1.24	1.38	2.6	n	0.25	0.71	0.8	187.3
946	闫锐	男	35	52	1.76	16.79	132	n	n	n	n	n	n	3.89	0.87	0.79	2.96	y	0.17	0.83	0.91	224.8
947	赵萍	女	35	54	1.5	24	103	n	n	n	n	n	n	8.55	3.3	1.27	5.47	y	0.66	1.16	2.08	92.1
948	于洪莲	女	35	75	1.65	27.55	127	n	n	n	n	n	n	4.74	2.89	0.99	2.92	y	0.58	0.77	0.89	673
949	马玉良	男	35	115	1.73	38.42	110	n	n	n	n	n	n	5.25	1.71	0.96	3.75	y	0.34	0.96	1.11	114.6
950	许长清	男	36	84	1.73	28.07	95	y	y	n	n	n	n	5.58	3.61	0.9	3.48	y	3.87	1.21	1.35	180
951	湛文军	男	36	84	1.73	28.07	135	y	n	y	n	n	n	4.67	2.58	0.92	3.26	y	0.52	1	1.04	121.8
952	吴嫩达利	男	36	78	1.7	26.99	156	y	n	n	n	n	n	5.25	1.92	1.09	3.29	n	0.92	0.85	1.05	486.2
953	杨春利	男	37	58	1.65	21.3	109	n	y	n	n	n	n	4.47	1.43	1.06	3.27	n	0.29	0.8	0.94	59.8
954	韩松	男	37	88	1.8	27.16	126	n	y	y	n	n	n	9.14	3.87	1.76	5.27	y	0.77	1.14	1.84	357.6
955	王玉文	男	38	82	1.74	27.08	148	n	n	n	n	n	n	5.46	1.22	1.06	3.28	n	0.24	0.93	1.11	32.3
956	崔丽颖	女	38	77	1.65	28.28	133	n	n	n	n	n	n	6.01	2.25	1.37	3.51	y	0.45	0.83	1.19	119.6
957	董立涵	男	39	92	1.76	29.7	106	n	y	n	n	n	n	5.02	0.5	1.54	3.06	n	0.1	0.94	1.05	33.2
958	霍艳	女	39	74	1.58	29.64	142	y	n	n	n	n	n	4.02	0.9	1.11	2.67	n	0.18	0.75	0.98	217.3
959	辛亚娟	女	39	65	1.65	23.88	132	y	n	n	n	n	n	5.34	0.96	1.72	3.45	n	0.19	0.56	1.02	5.5
960	张福东	男	39	70	1.7	24.22	122	n	n	n	n	n	n	4.84	1.47	1.07	3.02	n	0.29	0.38	1.11	7
961	韩梅	女	40	56	1.58	22.43	135	n	n	n	n	n	n	4.54	1.01	1.34	2.94	n	0.2	0.84	1.08	168.2
962	于宏波	女	40	70	1.6	27.34	140	n	n	n	n	n	n	4.48	1.94	1.25	2.79	n	0.39	0.93	0.94	210.6
963	姚敏	女	40	65	1.65	23.88	144	n	n	n	n	n	n	4.43	1.6	1.29	2.61	n	0.32	0.48	0.85	212.5
964	单庆福	男	40	86	1.79	26.84	103	n	n	n	n	n	n	5.31	1.47	1.23	3.54	n	0.29	0.69	1.08	273.4
965	于宏波	女	40	70	1.6	27.34	151	n	n	n	n	n	n	5.01	1.95	1.24	3.05	n	0.39	0.64	1.09	203.5
966	李秀丽	女	41	60	1.62	22.86	118	n	n	n	n	n	n	5.35	1.83	1.23	3.25	n	0.37	0.92	1.2	87.1
967	刘尊义	男	41	70	1.72	23.66	112	y	n	n	n	n	n	5	1.18	1.2	4.45	y	0.24	1.21	1.52	860.8
968	于瑞峰	男	41	76	1.6	29.69	140	n	n	n	n	n	n	5.99	1.95	1.03	3.72	y	0.39	0.9	1.2	231.3
969	吴晓红	男	41	61	1.68	21.61	140	n	n	n	n	n	n	4.51	1.43	1.1	3.02	n	0.29	0.68	0.91	186.2
970	赵立波	男	41	92.5	1.76	29.86	140	y	y	y	n	n	n	5.1	1.49	1.18	3.63	n	0.3	1.06	1.1	224.5
971	李桂双	男	42	68	1.79	21.22	112	n	n	n	n	n	n	4.36	1.51	0.76	2.59	y	0.3	0.54	0.88	382.9
972	杜志军	男	43	65	1.65	23.88	123	n	y	n	n	n	n	5.01	2.9	0.76	3.18	y	0.58	1.09	1.11	95.8
973	林兴彬	男	43	60	1.7	20.76	134	y	n	n	n	n	n	4.75	1.11	1.22	3.8	n	0.22	0.98	1.11	110.7
974	陶秀玲	女	43	50	1.5	22.22	123	n	n	n	n	n	n	4.28	1.64	0.88	2.63	y	0.33	0.74	0.76	447
975	李冬海	男	44	55	1.58	22.03	139	n	n	y	n	n	n	4.87	0.81	1.23	3.12	n	0.16	1.09	1.13	79.1
976	冷咏梅	女	44	58	1.62	22.1	107	n	n	n	n	n	n	4.69	0.66	1.04	3.47	n	0.13	0.84	0.96	484.9
977	卢静	女	44	67	1.56	27.53	121	n	n	n	n	n	n	5.46	0.79	1.31	3.76	n	0.16	1.1	1.2	201.7
978	宋立苓	男	44	45	1.54	18.97	125	n	n	n	n	n	n	5.42	0.63	1.41	3.67	n	0.13	0.9	1.03	116.3
979	刘艳丽	女	44	81	1.68	28.7	138	n	n	n	n	n	n	5.6	1.3	1.15	3.78	n	0.26	0.82	1.25	11.4
980	黄敏文	男	44	77	1.77	24.58	125	n	n	n	n	n	n	5.23	0.95	1.01	3.36	y	0.19	0.68	1.04	19.8
981	王燕	女	44	51	1.6	19.92	122	n	n	n	n	n	n	5.04	1.05	0.99	3.16	y	0.21	0.78	1.15	69.2
982	沈立祥	男	45	78	1.76	25.18	130	y	y	y	n	n	n	6.04	2.52	0.99	4.53	y	0.5	1.15	1.25	241.4
983	阚云涛	男	45	70	1.7	24.22	114	n	n	n	n	n	n	3.8	1.19	1.68	4.04	n	0.24	0.72	1.26	65.2
984	任凤芹	女	46	94	1.61	36.26	163	y	n	n	y	n	n	5.67	1.26	1.13	4.26	y	0.25	1.2	1.41	38.4
985	张喜波	男	46	72.5	1.64	26.96	137	y	n	n	n	n	n	7.06	1.48	1.7	4.69	y	0.3	0.64	1.29	347.8
986	荀红	女	46	78	1.6	30.47	148	n	n	n	n	n	n	5.21	0.99	1.14	4.11	n	0.2	1.11	1.34	76.3
987	李占东	男	47	73	1.69	25.56	129	n	y	y	n	n	n	4.27	2.08	1.14	2.55	n	0.42	0.24	0.87	60.8
988	刘艳琪	女	47	62	1.61	23.92	137	y	n	n	n	n	n	3.66	1.24	0.92	2.16	y	0.25	0.88	0.9	509.3
989	巴立有	男	47	59	1.74	19.49	96	n	y	n	n	n	n	5.1	0.87	1.12	3.87	n	0.17	0.88	1.32	119.5
990	李凤梅	女	47	65	1.58	26.04	115	n	n	n	n	n	n	6.5	3.55	0.93	3.96	y	0.71	1.47	1.52	107.2
991	迟雨萍	女	47	56	1.65	20.57	122	n	n	n	n	n	n	6.59	1.04	1.4	4.5	y	0.21	1.13	1.25	32
992	仇延军	男	48	70	1.7	24.22	138	n	y	y	n	n	n	5.42	1.5	1.21	3.86	n	0.3	0.99	1.16	28.4
993	胡静涛	男	48	77	1.75	25.14	100	n	n	n	n	n	n	5.5	2.02	1.1	4.01	n	0.4	0.68	1.23	274.1
994	李成源	男	49	70	1.78	22.09	141	y	y	y	n	n	n	6.51	6.58	1.22	3.32	y	1.32	1.22	1.28	228.9
995	陈彦侠	女	49	59	1.67	21.16	137	y	n	n	n	n	n	4.97	1.51	1.37	2.92	n	0.3	0.69	0.89	34.3
996	曲长胜	男	49	68	1.62	25.91	148	y	n	n	n	n	n	5.77	0.92	1.53	3.86	y	0.18	0.98	1.16	176.7
997	孔丽娟	女	50	57.5	1.52	24.89	147	y	y	n	n	n	n	5.64	1.59	1.1	3.61	n	0.32	1.18	1.44	218.4
998	王顺功	男	50	82	1.73	27.4	159	y	n	n	y	n	n	5.23	0.77	1.38	3.42	n	0.15	1.08	1.12	122.7
999	崔昌亭	男	50	72.5	1.74	23.95	140	y	y	n	n	n	n	6.62	0.85	1.36	5.09	y	0.17	0.96	1.48	55.6
1000	杨秀芝	女	50	85	1.7	29.41	109	n	n	n	n	n	n	5.34	0.78	1.33	3.23	n	0.16	0.68	0.91	115.5
1001	刘传麟	男	52	78	1.77	24.9	98	n	n	y	n	n	n	4.86	1.01	1.34	2.96	n	0.2	0.71	1.13	137.1
1002	刘香芝	女	52	72	1.62	27.43	143	n	n	n	n	n	n	4.98	2.43	0.85	3.71	y	0.49	1.04	1.05	280
1003	李春荣	女	52	65	1.53	27.77	138	n	n	n	n	n	n	5.49	1.53	1.69	3.33	n	0.31	0.93	1.1	64.5
1004	李丽	女	52	70	1.58	28.04	132	n	n	n	n	n	n	5.3	1.73	1.04	3.39	n	0.35	1.01	1.02	109.6
1005	祖晓光	女	52	76	1.56	31.23	140	n	n	n	n	n	n	7.12	3.09	2.21	3.92	y	0.62	0.28	0.99	13.4
1006	张云凤	女	52	70	1.7	24.22	118	n	n	n	n	n	n	5.08	1.13	1.18	3.22	n	0.23	1.02	1.08	126.9
1007	桑春玲	女	52	70	1.64	26.03	134	n	n	n	n	n	n	4.98	1.75	1.17	2.92	n	0.35	0.63	0.96	116.3
1008	周洪光	男	53	82	1.65	30.12	175	y	n	n	y	n	n	4.1	1.38	1.66	3.77	n	0.28	0.74	1.26	237.5
1009	徐敬丽	女	53	60	1.62	22.86	128	n	n	n	n	n	n	4.4	1.01	1.33	4.1	n	0.2	1.28	1.3	49.6
1010	李瑛	女	53	47.5	1.62	18.1	114	y	n	n	y	n	n	4.64	1.46	1.18	2.79	n	0.29	0.66	0.77	154.4
1011	张长江	男	53	60	1.65	22.04	140	n	n	y	n	n	n	5.54	3.9	0.9	3.52	y	0.78	1.02	1.24	200.1
1012	李玉芬	女	53	71	1.62	27.05	156	n	y	n	n	n	n	8.24	4.39	2.08	4.61	y	0.88	0.86	1.59	302.8
1013	包远东	男	53	95	1.83	28.37	136	n	n	n	n	n	n	4.82	1.52	0.98	3.15	y	0.3	1.03	1.12	55.6
1014	张长江	男	53	61	1.65	22.41	138	n	n	n	n	n	n	8.34	6.28	1.27	3.95	y	1.26	1.17	1.47	35.5
1015	陈丽	女	54	57	1.6	22.27	121	n	n	n	n	n	n	3.88	1.6	1.41	4.03	n	0.32	1.08	1.25	321.4
1016	于淑范	女	54	60	1.65	22.04	156	n	n	n	n	n	n	5.05	0.99	1.21	3.13	n	0.2	0.58	0.93	612.1
1017	王艳	女	54	57	1.6	22.27	129	n	n	n	n	n	n	7.73	3.64	0.88	4.67	y	0.73	1.46	2.04	93.5
1018	黄清富	男	55	67	1.68	23.74	110	n	y	y	n	n	n	3.27	0.9	0.94	1.68	y	0.18	0.64	0.7	207.5
1019	陶福全	男	55	70	1.65	25.71	149	y	y	y	n	n	n	3.17	0.72	2.19	3.38	n	0.14	0.93	1.07	804
1020	关清成	男	55	70	1.73	23.39	137	y	n	n	n	n	n	6.16	1.79	1.21	4.71	y	0.36	1.26	1.35	271.9
1021	王丽君	女	55	70	1.7	24.22	141	n	n	n	y	n	n	5.87	1.74	1.25	4.2	y	0.35	1.19	1.22	10.4
1022	高生	男	56	70	1.6	27.34	148	y	y	n	n	n	n	5.68	1.71	1.46	3.74	n	0.34	0.83	1.24	59.3
1023	曹炳华	女	56	75	1.65	27.55	144	y	y	n	n	n	n	5.44	1.47	1.11	3.67	n	0.29	1.24	1.25	44.4
1024	刘玉凤	女	56	46	1.55	19.15	131	y	n	n	n	n	n	4.84	1.39	1.11	3.18	n	0.28	0.73	0.99	144.8
1025	高生	男	56	72	1.6	28.13	140	y	n	n	n	n	n	5.44	1.8	1.5	3.63	n	0.36	0.99	1.24	18.5
1026	徐智科	男	56	65	1.66	23.59	136	n	n	n	n	n	n	5.92	2.76	1.01	3.5	y	0.55	0.99	1.21	138.9
1027	冷淑波	女	57	44	1.6	17.19	95	n	n	n	n	n	n	3.06	1.74	0.66	2.15	y	0.35	0.62	0.75	64
1028	王佩兰	女	58	66	1.54	27.83	157	y	n	n	n	n	n	4.97	1.26	1.24	3.09	n	0.25	0.79	0.89	337.2
1029	姜喜民	男	58	65	1.7	22.49	114	n	n	n	n	n	n	5.05	0.96	1.48	3.22	n	0.19	0.86	0.96	166
1030	何为	男	59	68	1.63	25.59	168	y	y	n	y	n	n	5.12	1.18	1.19	3.41	n	0.24	0.72	1.08	12.1
1031	刁丽华	女	59	61	1.61	23.53	161	y	n	n	y	n	n	4.79	1.45	1.16	3.18	n	0.29	0.75	1.15	200.6
1032	时东风	女	59	40	1.61	15.43	111	n	n	n	n	n	n	4.75	0.49	1.73	2.74	n	0.1	0.75	0.85	206.9
1033	姜继文	男	59	83	1.65	30.49	145	y	n	n	n	n	n	4.73	0.7	1.23	3.04	n	0.14	0.86	0.89	265.1
1034	赵文超	男	59	75	1.68	26.57	156	n	y	y	y	n	n	5.3	2.22	0.56	3.49	y	0.44	0.99	1.5	265.1
1035	吕梅厚	女	59	65	1.6	25.39	137	n	n	n	n	n	n	6.7	1.57	1.33	4.3	y	0.31	0.78	1.52	4
1036	钱君	男	60	75	1.75	24.49	135	y	n	n	n	n	n	4.58	1.33	1.24	2.71	n	0.27	0.8	1.01	106.7
1037	刘宝齐	男	60	65	1.72	21.97	156	n	n	n	y	n	n	5.26	1.01	1.65	3.31	n	0.2	0.87	0.96	139.7
1038	吕振义	男	60	75	1.74	24.77	126	y	n	y	n	n	n	5.35	2.4	1.09	3.58	y	0.48	0.73	1.14	29.3
1039	苑传奇	男	16	54	1.82	16.3	89	n	y	n	n	n	n	6.89	0.92	2.19	4.27	y	0.18	0.91	1.3	102
1040	李学慧	男	16	54	1.65	19.83	105	n	n	n	n	n	n	4.44	1.39	1.28	3.05	n	0.28	0.9	0.92	274.4
1041	闫磊	男	16	72	1.7	24.91	101	n	n	n	n	n	n	8.47	8.11	1.18	4.6	y	1.62	0.9	1.05	102.5
1042	何坪	男	16	105	1.76	33.9	130	n	n	n	n	n	n	4.07	1.47	1.27	2.53	n	0.29	0.91	0.94	17.8
1043	高世鑫	男	16	76	1.75	24.82	128	n	n	n	n	n	n	5.96	3.52	1.08	4.18	y	0.7	0.9	1.24	76.7
1044	邢天一	女	20	48	1.62	18.29	103	n	n	n	n	n	n	6.15	0.31	1.75	4.24	y	0.06	1.23	1.28	127.3
1045	郑茜文	女	20	91.5	1.62	34.87	135	n	n	n	n	n	n	6.13	0.79	1.26	4.34	y	0.16	1.25	1.41	46.1
1046	朱梓玮	男	21	75	1.72	25.35	111	n	n	n	n	n	n	4.99	0.92	0.98	3.08	y	0.18	0.91	0.95	119.3
1047	张莹莹	女	21	72	1.62	27.43	125	n	n	n	n	n	n	4.38	0.83	1.3	2.9	n	0.17	0.89	0.91	176.8
1048	赵金銮	女	22	61	1.6	23.83	113	n	n	n	n	n	n	5.3	0.63	1.26	3.44	n	0.13	0.75	1.04	232.6
1049	陶冶	男	22	85	1.74	28.08	143	y	n	n	n	n	n	5.29	0.95	1.34	3.1	n	0.19	1.19	1.24	183.1
1050	刘金萍	女	26	62	1.66	22.5	119	n	n	n	n	n	n	4.27	0.88	1.15	2.69	n	0.18	0.9	0.91	22.4
1051	宗晓磊	男	26	70	1.68	24.8	139	n	n	n	n	n	n	5.14	1.07	1.22	3.85	n	0.21	1.15	1.24	49.2
1052	赵春荣	男	27	90	1.86	26.01	128	n	n	n	n	n	n	3.56	1.27	1.2	2.3	n	0.25	0.8	0.84	37.4
1053	王博	男	27	90	1.8	27.78	132	y	y	y	n	n	n	4.38	1.88	1.2	2.51	n	0.38	0.95	1.19	100.5
1054	于海宽	男	27	75	1.75	24.49	152	y	n	n	n	n	n	4	0.88	1.31	3.62	n	0.18	1	1.09	249.5
1055	陈倩	女	28	54	1.67	19.36	109	n	n	n	n	n	n	2.99	1.98	1.56	3.6	n	0.4	0.91	1.07	333.7
1056	姜玉龙	男	28	72	1.7	24.91	128	n	n	n	n	n	n	5.13	1.4	1.11	3.77	n	0.28	0.95	1.16	217.1
1057	王淑红	男	28	55	1.6	21.48	131	n	n	n	n	n	n	7.75	0.83	1.8	5.54	n	0.17	1.33	1.45	73.5
1058	苗鑫	女	28	62	1.58	24.84	110	n	n	n	n	n	n	3.88	0.78	1.23	2.64	n	0.16	0.78	0.8	286.3
1059	邢思源	男	28	69	1.71	23.6	129	n	n	n	n	n	n	4.97	1.23	1.1	3.08	n	0.25	0.66	0.88	90.3
1060	张延强	男	28	82	1.73	27.4	140	y	y	y	n	n	n	4.87	1.05	0.95	2.99	y	0.21	0.78	1	150.9
1061	翟雪萍	女	29	60	1.62	22.86	104	n	n	y	n	n	n	3.69	0.53	1.52	1.77	n	0.11	0.45	0.62	219
1062	聂晓旭	男	29	64	1.6	25	121	n	n	n	n	n	n	4.8	0.62	1.23	3.14	n	0.12	0.8	1.1	109.8
1063	杨言博	男	29	80	1.78	25.25	132	n	n	n	n	n	n	4.74	0.86	0.9	3.36	y	0.17	0.81	0.94	88.3
1064	赵韧明	男	29	53	1.73	17.71	144	y	n	n	n	n	n	5.23	1.42	1.17	3.38	n	0.28	0.95	1.1	143.8
1065	赵越超	女	31	65	1.5	28.89	126	n	y	n	n	n	n	4.2	2.34	0.74	2.79	y	0.47	1.06	1.07	154.6
1066	周立杰	女	31	72	1.55	29.97	113	n	n	n	n	n	n	5.74	3.5	1.03	4.05	y	0.7	1.14	1.28	340.1
1067	孟梓涵	女	31	54	1.6	21.09	112	n	n	n	n	n	n	5.02	1.57	1.04	2.9	n	0.31	0.91	1.04	237.2
1068	孙亚楠	女	31	75	1.57	30.43	127	n	n	n	n	n	n	7.26	3.26	1.33	4.73	y	0.65	1.36	1.54	170.9
1069	白素英	女	62	80	1.62	30.48	158	y	n	n	n	n	n	6.75	2.29	1.24	5.22	y	0.46	1.07	1.69	141.6
1070	张相阁	男	62	75	1.8	23.15	113	n	n	y	n	n	n	6.15	2.62	1.15	3.82	y	0.52	1.02	1.38	71.6
1071	王家国	男	62	70	1.75	22.86	112	y	n	n	n	n	n	5.16	1.48	1.08	3.31	n	0.3	1.07	1.08	187
1072	王继财	男	62	60	1.7	20.76	154	y	n	n	y	n	n	5	0.7	1.56	3.39	n	0.14	1.1	1.11	132.5
1073	王惠敏	男	62	65	1.71	22.23	147	y	y	n	n	n	n	6.41	1.8	1.18	4.54	y	0.36	1.07	1.1	101.7
1074	葛秀芬	女	63	60	1.5	26.67	156	y	n	n	y	n	n	4.85	0.53	1.17	3.74	n	0.11	1.02	1.3	150.9
1075	石一	女	63	61	1.5	27.11	130	y	n	n	n	n	n	7.19	1.32	1.39	5.43	y	0.26	1.17	1.83	481.2
1076	胡海	男	63	67	1.72	22.65	126	n	n	n	n	n	n	5.07	1.52	1.15	3.36	n	0.3	0.75	1.04	137.7
1077	唐殿富	男	63	88	1.75	28.73	145	n	n	n	n	n	n	5.42	1.37	1.11	3.99	n	0.27	0.94	1.04	141.3
1078	朱云起	男	63	80	1.8	24.69	158	y	y	y	n	n	n	5.68	0.79	1.41	3.71	n	0.16	0.99	1.11	221.2
1079	陈维强	男	63	60	1.72	20.28	124	n	n	n	n	n	n	5.6	1.12	1.39	3.75	n	0.22	1.07	1.16	246.9
1080	袁井兰	女	63	73	1.6	28.52	136	n	n	n	n	n	n	5.03	3.79	0.8	3.53	y	0.76	1.04	1.11	110.5
1081	栾玉萍	女	63	61	1.6	23.83	103	n	n	n	n	n	n	4.68	1.96	0.87	3.32	y	0.39	0.84	1.12	204.3
1082	毕景芝	女	63	58	1.6	22.66	158	n	n	n	y	n	n	4.93	0.75	1.05	3.22	n	0.15	1.1	1.14	136.7
1083	李忠全	男	64	90	1.76	29.05	155	y	y	n	y	n	n	5.11	3.83	0.83	3.37	y	0.77	1.08	1.14	231.9
1084	刘贺林	男	64	85	1.7	29.41	137	y	n	y	n	n	n	3.39	2.03	1.12	1.99	n	0.41	0.81	0.89	355
1085	寇玉兰	女	64	58	1.68	20.55	120	n	n	n	n	n	n	4.62	2.45	0.88	2.94	y	0.49	0.97	1.03	274.4
1086	闫丽梅	女	64	60	1.67	21.51	108	n	n	n	n	n	n	5.61	1.52	0.87	4.31	y	0.3	1.04	1.23	181.2
1087	唐殿富	男	64	85	1.75	27.76	133	n	n	n	n	n	n	6.72	1.17	1.44	4.16	y	0.23	1.28	1.36	360.5
1088	孙地华	男	65	60	1.78	18.94	70	n	y	y	n	n	n	4.66	0.91	0.75	3.19	y	0.18	1.06	1.12	211
1089	刘安	男	65	68	1.74	22.46	139	n	y	n	n	n	n	4.77	1.84	0.94	3.18	y	0.37	0.74	1	156.1
1090	张婉莹	女	66	50	1.7	17.3	134	y	n	n	n	n	n	5.5	1.33	1.18	3.45	n	0.51	1.2	1.28	328.2
1091	李福娥	女	66	75	1.62	28.58	136	y	n	n	n	n	n	2.61	2.24	1.24	3.97	n	0.45	1	1.32	239.4
1092	邱帮中	男	66	60	1.67	21.51	165	y	y	n	y	n	n	4.4	1.49	1.32	3.81	n	0.3	1.25	1.41	243
1093	徐玉翠	女	66	70	1.62	26.67	130	n	n	n	n	n	n	7.32	2.65	1.31	5.27	y	0.53	1.18	1.52	243.4
1094	吴廷文	男	66	65	1.68	23.03	147	y	n	n	n	n	n	6.01	2.4	0.89	3.8	y	0.48	1.05	1.27	288
1095	李丰	女	67	65	1.6	25.39	164	y	y	n	y	n	n	5.04	1.48	1.12	3.42	n	0.3	1.16	1.19	139
1096	黄德华	男	67	65	1.68	23.03	160	y	n	n	n	n	n	6.02	1.9	1.14	4.34	y	0.38	0.97	1.34	165
1097	王生	男	67	63	1.67	22.59	130	y	y	y	n	n	n	4.51	1.02	0.98	2.76	y	0.2	0.92	0.94	34
1098	李明福	男	68	78	1.76	25.18	138	n	n	n	n	n	n	4.63	1.08	1.04	2.89	n	0.22	0.73	0.91	177
1099	宋嘉豪	男	69	40	1.4	20.41	104	n	n	n	n	n	n	4.53	0.97	1.14	2.89	n	0.19	0.76	0.91	144
1100	原春喜	男	70	50	1.7	17.3	134	n	n	n	n	n	n	5.21	2.2	1.53	3.56	n	0.44	0.79	1.1	166
1101	平凡	男	72	90	1.74	29.73	148	y	y	y	y	n	n	5.02	1.23	1.19	3.57	n	0.25	0.78	1.14	118
1102	张奎伟	男	72	72	1.73	24.06	124	n	n	n	n	n	n	5.55	3.23	1	3.94	y	0.65	1.04	1.33	204
1103	金守福	男	72	49	1.63	18.44	99	n	n	n	n	n	n	4.23	1.36	1.43	2.53	n	0.27	0.83	0.9	131
1104	栾辅志	男	73	75	1.75	24.49	137	y	n	n	n	n	n	4.92	2.12	1.14	3.56	n	0.42	1.04	1.2	164
1105	徐福顺	男	75	72	1.7	24.91	126	n	n	n	n	n	n	4.42	1.18	1.33	3.37	n	0.24	0.73	0.97	125
1106	张信	男	75	60	1.67	21.51	168	n	n	n	n	n	n	5.27	0.99	1.14	3.32	n	0.2	0.67	0.98	143
1107	周凤富	男	80	55	1.65	20.2	167	y	n	n	y	n	n	4.13	0.62	1.17	2.55	n	0.12	0.77	0.83	142.07
1108	曾绍章	男	80	65	1.73	21.72	146	n	n	n	n	n	n	5.4	2.06	1.4	4.08	n	0.41	1.17	1.37	69.33
1109	徐武章	男	82	57	1.7	19.72	148	n	y	y	n	n	n	4.13	1.08	1.32	2.42	n	0.22	0.69	0.75	50.09
1110	王兆久	男	82	59	1.62	22.48	139	n	n	n	n	n	n	5.59	1.4	1.33	3.94	n	0.28	0.93	1.44	180.19
