# Supplementary material for: Prediction of cardiovascular disease risk in patients with psoriasis in northern China
Source: Research Square preprint supplement (doi:10.21203/rs.3.rs-1490270/v2), 2022-05-02
Supplement: Supplementary file 2 [file bf73e344ebe1b1043d41ff35.xlsx]

## Sheet: Sheet1
编号	病人姓名	性别	诊断	PASI	年龄	体重Kg	身高m	BMI	病史年	CVD疾病	收缩压	高血压病	糖尿病	吸烟史	酗酒史	CHOL/TC	TG	HDL(mmol/L)	LDL(mmol/L)	VLDL(mmol/L)	Apoa(g/L)	Apob(g/L)	Lpa(mg/L)
1	高飞	男	寻常性银屑病	10	45	67	1.76	21.63	1	n	129	n	n	y	n	4.41	1.2	1.04	3.29	0.24	0.59	0.99	22.4
2	许琼	女	脓疱性银屑病	24	16	56	1.63	21.08	1	n	138	y	n	y	n	4.02	1.58	0.86	2.73	0.32	0.98	0.84	23
3	李文涛	男	斑块状银屑病	42	58	84	1.7	29.07	0.25	y	134	y	n	n	n	5.38	3.62	1.01	3.18	0.72	0.82	1.16	23.51
4	苗书瑜	男	泛发性脓疱型银屑病	42	16	50	1.58	20.03	3	y	160	y	n	n	n	4.25	3.43	0.82	2.73	0.69	1.34	0.94	23.6
5	张春辉	男	斑块状银屑病	32	52	70	1.7	24.22	3	n	118	n	y	n	n	4.06	0.97	1.02	2.55	0.19	1.39	1.07	24.43
6	申殿军	男	斑块状银屑病	28	56	70	1.64	26.03	41	n	118	n	n	y	y	5.42	1.6	1.44	3.65	0.32	0.74	1.11	25.16
7	徐洪军	男	斑块状银屑病	36	56	72	1.68	25.51	0.2	n	105	n	n	n	n	4.03	0.86	1.76	1.97	0.17	0.77	0.59	25.3
8	徐洪彬	男	斑块状银屑病	10	35	64	1.65	23.51	3	n	113	n	n	n	n	4.47	0.62	1.54	2.54	0.12	0.69	0.71	25.9
9	马强	男	斑块状银屑病	15.3	36	100	1.85	29.22	0.2	n	125	n	n	y	n	3.95	2.13	0.67	2.41	0.43	0.93	0.97	25.9
10	赵玉和	男	斑块状银屑病	12	56	97	1.72	32.79	4	n	113	n	n	n	n	4.56	1.33	1.15	2.88	0.27	1.3	0.98	26
11	杨忠乙	男	红皮病性银屑病	42	71	89	1.65	32.69	0.1	n	134	y	y	n	n	4.81	0.93	1.5	3.12	0.19	1.34	1.01	26.6
12	李忠全	男	寻常性银屑病	12	64	92	1.75	30.04	30	y	144	y	n	y	y	4.16	1.28	0.96	2.57	0.26	1.22	0.83	26.6
13	赵亚华	女	脓疱性银屑病	13.6	54	57	1.6	22.27	5	y	141	y	n	n	n	4.72	2.36	1.35	2.75	0.47	0.89	1	27.6
14	展召玉	男	寻常性银屑病	24	50	72.5	1.72	24.51	6	y	152	y	n	n	n	5.24	2.18	1.2	3.4	0.44	1.04	1.28	27.74
15	赵春耕	男	斑块状银屑病	24	45	80	1.7	27.68	50	n	179	y	y	n	n	4.65	1.81	1.25	2.81	0.36	0.94	1.01	27.76
16	满燕华	男	关节病型银屑病	21	65	64	1.57	25.96	0.5	n	122	n	n	n	n	3.37	1.17	1.27	1.89	0.23	1.16	0.67	27.8
17	路军	女	斑块状银屑病	10	55	80	1.75	26.12	15	n	149	y	y	n	n	4.1	1.86	1.46	2.32	0.37	1.28	0.84	28.21
18	周妮华	女	斑块状银屑病	21	36	82	1.66	29.76	2	n	142	y	n	n	n	4.83	1.88	1.22	3.23	0.38	1.12	1.1	28.37
19	郭守军	男	泛发性脓疱型银屑病	18	41	70	1.7	24.22	7	n	126	n	n	n	n	2.47	0.97	0.53	1.45	2.74	1.34	0.72	28.4
20	贺丽萍	女	斑块状银屑病	28	51	60	1.5	26.67	0.5	n	134	y	n	n	n	5.62	0.95	1.94	3.4	0.19	1.32	1.1	28.7
21	马洪涛	男	斑块状银屑病	12	31	89	1.68	31.53	0.5	n	127	n	n	n	n	4.59	1.06	0.98	2.89	0.21	1.1	1	29
22	丁红霞	女	斑块状银屑病	48	49	50	1.55	20.81	16	y	126	y	n	n	n	2.69	0.76	0.74	1.29	0.15	1.56	0.6	29.36
23	王玉兰	女	斑块状银屑病	28	76	54	1.6	21.09	6	n	167	y	n	n	n	4.99	1.47	1.08	3.57	0.29	1.42	1.15	29.5
24	吴革玲	女	斑块状银屑病	14	72	70	1.55	29.14	9	n	133	y	n	n	n	3.95	2.09	0.74	2.46	0.42	1.45	0.94	29.61
25	杨晶	女	斑块状银屑病	25	39	67	1.6	26.17	0.5	y	150	y	y	y	y	3.54	2.48	0.62	2.14	0.5	1.01	0.84	30.93
26	暴锡强	男	红皮病性银屑病	45	64	72	1.7	24.91	1	y	161	y	n	n	n	5.27	2.99	0.8	3.36	0.6	1.16	1.16	31.21
27	苏灿	女	斑块状银屑病	16.2	20	56	1.53	23.92	20	y	167	y	n	n	n	5.16	2.23	1.18	3	0.45	1.24	1.16	31.49
28	薛兴富	男	斑块状银屑病	10.8	48	80	1.72	27.04	20	n	135	y	y	y	y	4.73	2.07	1.07	3.19	0.41	1.34	1.07	31.96
29	刘东明	男	脓疱性银屑病	36	44	70	1.7	24.22	5	n	133	y	n	n	n	4.78	1.43	0.79	3.57	0.29	1.35	1.15	32.1
30	张釜源	男	寻常性银屑病	16	16	53	1.6	20.7	1.5	n	95	n	n	n	n	5.2	2.05	1.05	3.59	0.41	1.01	1.12	32.11
31	周明雪	女	寻常性银屑病	45	28	69	1.63	25.97	0.5	n	127	n	n	n	n	4.17	1.41	0.99	2.63	0.28	0.88	0.86	32.11
32	张劼	男	关节病型银屑病	45	35	85	1.7	29.41	15	n	100	n	n	y	n	1.63	0.45	0.73	0.56	0.09	1.32	0.3	32.4
33	于杰	女	寻常性银屑病	45	48	72.5	1.63	27.29	30	y	145	y	n	n	n	4.35	3.74	0.95	2.64	0.75	0.84	0.97	32.5
34	姜雨薇	女	脓疱性银屑病	25	32	90	1.68	31.89	25	n	151	y	y	n	n	4.2	1.49	1.26	2.42	0.3	1.24	0.88	32.95
35	王东轩	男	斑块型银屑病	15	35	78	1.7	26.99	2	n	109	n	n	n	n	3.62	1.37	1	2.25	0.27	1.45	0.77	33.5
36	刘文艳	女	红皮病性银屑病	25	47	57	1.6	22.27	20	y	136	y	y	n	n	4.32	1.46	0.73	2.88	0.29	1.31	1.08	33.5
37	王刚	男	斑块状银屑病	12	55	74	1.78	23.36	25	n	138	y	n	n	y	4.69	2.24	0.99	2.99	0.45	1.07	1.07	33.72
38	杜恩方	男	寻常性银屑病	30	63	67	1.7	23.18	2	n	105	n	n	n	n	2.31	0.44	0.65	1.36	0.09	1.25	0.48	34.4
39	丁红霞	女	寻常性银屑病	18	49	50	1.55	20.81	7	n	156	y	n	n	n	4.01	1.15	1.12	2.64	0.23	1.07	0.8	34.44
40	赵来雨	女	斑块状银屑病	4	74	84	1.74	27.74	22	n	129	n	n	n	n	4.25	0.92	1.09	2.53	0.18	1.14	1.01	23
41	程立新	男	斑块状银屑病	6.8	49	55	1.68	19.49	6	y	160	y	y	y	y	2.82	1.18	0.81	1.46	0.24	1.16	0.63	23.64
42	马山	男	泛发性脓疱型银屑病	7	38	58	1.7	20.07	3	y	140	y	y	y	y	6.39	3.02	1.24	4.37	0.6	1.6	1.34	25.5
43	段玉涛	男	斑块状银屑病	3	42	77	1.7	26.64	0.1	n	128	n	n	n	n	3.76	1.04	1	2.54	0.21	1.14	0.73	25.54
44	郭鑫	男	泛发性脓疱型银屑病	7.8	40	108	1.73	36.09	20	n	110	n	n	n	n	4.59	1	1.22	2.83	0.2	1.3	0.96	28.86
45	刘华英	女	斑块状银屑病	1.4	64	70	1.62	26.67	13	n	150	y	y	n	n	5.3	1.07	1.11	3.68	0.21	1.09	1.21	29.3
46	刘华英	女	斑块状银屑病	1.4	64	70	1.62	26.67	13	n	150	y	y	n	n	5.3	1.07	1.11	3.68	0.21	1.09	1.21	29.3
47	庞雷	男	斑块状银屑病	6	34	86	1.78	27.14	1	n	98	n	n	y	y	4.19	0.77	1.23	2.58	0.15	0.84	0.8	30.2
48	王志强	男	红皮病性银屑病	8	54	65	1.65	23.88	4	y	157	y	n	y	y	4.49	1.45	1.02	2.95	0.29	1.03	1.05	33.17
49	于洋	男	斑块状银屑病	8	33	117	1.73	39.09	0.5	n	99	n	n	n	n	2.31	0.44	0.65	1.36	0.09	0.97	0.48	34.1
50	许继民	男	红皮病性银屑病	4	35	68	1.8	20.99	1	n	119	n	n	n	n	5.59	0.6	1.2	4.24	0.12	0.58	1.25	34.44
51	付永强	男	寻常性银屑病	12	52	75	1.71	25.65	10	n	120	n	n	y	n	4.69	0.91	1.06	3.45	0.18	1	0.87	1239.3
52	丛绪兰	女	寻常性银屑病	35	58	55	1.58	22.03	9	n	109	n	n	y	n	5.59	0.6	1.2	4.24	0.12	1.19	1.25	34.7
53	徐博	男	寻常性银屑病	12	28	76	1.8	23.46	0.2	n	111	n	n	n	n	3.19	1.04	1.16	1.59	0.21	0.69	0.58	34.7
54	王华	男	红皮病性银屑病	14	52	68	1.74	22.46	3	y	165	y	y	n	n	3.35	1.32	0.63	2.17	0.26	1.19	0.8	34.7
55	郭天龙	男	寻常性银屑病	12	28	74	1.7	25.61	10	n	132	y	n	n	n	3.29	0.6	1.19	1.84	0.12	1.12	0.52	34.7
56	程学山	男	斑块状银屑病	9	59	80	1.7	27.68	20	n	119	n	n	n	n	4.2	1.1	0.85	2.83	0.22	1.04	0.98	34.9
57	甄和霞	女	斑块状银屑病	3	54	56	1.56	23.01	15	n	125	n	n	n	n	3.62	0.82	0.81	2.43	0.16	1.53	0.86	34.9
58	李玉梅	女	银屑病性关节炎	10	51	75	1.6	29.3	30	n	143	y	n	n	n	5.71	1	1.35	4.08	0.2	1.47	1.26	35.1
59	米洪亮	男	寻常性银屑病	14	58	78	1.7	26.99	7	n	112	n	n	n	n	4.51	1.04	1.06	3.13	0.21	0.97	0.98	35.5
60	孙超	男	脓疱性银屑病	35	27	120	1.81	36.63	40	n	142	y	n	n	n	5.47	2.28	1.44	3.46	0.46	0.8	1.14	36
61	李广胜	男	寻常性银屑病	24	48	85	1.8	26.23	10	n	138	y	n	n	n	4.62	2.09	0.97	3.03	0.42	0.95	1.17	36.4
62	张胜	男	寻常性银屑病	8	48	75	1.8	23.15	20	n	145	y	n	n	n	4.38	1.06	0.88	3.29	0.21	0.85	0.63	814.7
63	宋东梅	女	脓疱性银屑病	18	34	51	1.62	19.43	15	n	127	n	n	n	n	5.89	3.73	1.19	3.53	0.75	0.84	1.42	36.4
64	朱旭	男	关节型银屑病	18	26	80	1.79	24.97	40	n	145	y	n	n	n	4.47	1.5	1.04	3.34	0.3	0.96	1.21	36.52
65	唐淑琴	女	红皮病性银屑病	5.7	61	76	1.55	31.63	8	n	107	n	n	n	y	2.48	0.64	0.72	1.25	0.13	1.15	0.51	36.8
66	卢旭	男	滴状银屑病	15	21	82	1.8	25.31	0.15	n	138	y	n	y	n	4.26	0.61	1.29	2.62	0.12	1.05	0.87	36.8
67	闫春艳	女	斑块状银屑病	24	48	59	1.6	23.05	30	y	131	y	n	n	n	4.51	1.04	1.06	3.13	0.21	0.97	0.98	37.05
68	庞瑞洋	男	寻常性银屑病	30	29	90	1.8	27.78	0.1	n	142	y	n	y	y	3.59	1.05	0.82	2.6	0.21	0.61	0.75	37.1
69	姜环雨	男	红皮病性银屑病	24	42	80	1.55	33.3	3	n	130	y	n	n	n	6.15	1.42	1.81	3.98	0.28	1.04	1.28	37.7
70	赵希贝	男	红皮病性银屑病	18	16	72	1.6	28.13	0.15	n	121	n	n	y	n	5.77	2.6	1.11	4.46	0.52	0.93	1.16	37.8
71	郭清海	男	寻常性银屑病	5.4	50	88	1.78	27.77	15	y	131	y	y	n	n	2.93	1.24	0.68	1.53	0.25	0.72	0.63	37.9
72	刘庆荣	女	红皮病性银屑病	48	78	51	1.5	22.67	0.2	n	100	n	n	n	n	2.93	1.24	0.68	1.53	0.25	1.1	0.63	38
73	杜凤林	男	脓疱性银屑病	18	57	75	1.8	23.15	30	y	132	y	n	n	n	2.65	1.01	1	1.24	0.2	1.02	0.45	39.03
74	丁义卿	男	寻常性银屑病	21	27	96	1.83	28.67	0.2	y	120	n	n	n	n	3.7	1.16	1.11	2.51	0.23	1.38	0.7	39.6
75	于洋	男	寻常性银屑病	3.6	33	108	1.72	36.51	20	n	117	n	n	y	n	3.91	0.88	1.12	2.35	0.18	0.94	0.71	39.66
76	李长胜	男	红皮病性银屑病	18	16	66	1.53	28.19	10	n	125	n	n	n	n	4.15	1.12	1.05	2.7	0.22	1.15	0.79	39.8
77	赵英哲	男	脓疱性银屑病	42	16	47	1.47	21.75	0.5	n	132	y	n	n	n	4.54	0.99	0.82	3.12	0.2	1.06	0.61	39.9
78	宋清云	女	脓疱性银屑病	3.6	42	61	1.55	25.39	1	n	124	n	n	n	n	3.55	0.88	0.95	2.09	0.18	1.32	0.64	40.17
79	单凤娇	女	寻常性银屑病	12	38	65	1.65	23.88	0.1	n	108	n	n	n	n	4.54	0.99	0.82	3.12	0.2	1.25	0.61	40.44
80	张宝和	男	红皮病性银屑病	6	62	66	1.75	21.55	0.15	n	118	n	n	n	n	4.16	0.71	1.29	2.29	0.14	1.01	0.72	40.69
81	段超	男	寻常性银屑病	48	31	89	1.75	29.06	0.2	n	98	n	n	n	n	3.81	1.23	0.96	2.3	0.25	0.95	0.71	41
82	张浩	男	脓疱性银屑病	42	19	65	1.8	20.06	30	n	148	y	y	y	y	4.2	1.13	1.09	1.47	0.24	1	0.77	41.2
83	李庆伟	男	红皮病性银屑病	24	27	65	1.76	20.98	10	n	129	n	n	n	n	4.9	8.3	0.84	1.61	1.66	0.93	0.74	41.27
84	宋玉	女	脓疱性银屑病	18	26	62	1.69	21.71	7	n	127	n	n	n	n	3.31	0.64	0.82	1.8	0.13	0.82	0.65	41.3
85	张宝华	女	寻常性银屑病	12	59	69	1.63	25.97	0.15	n	133	y	n	n	n	3.37	0.9	0.9	1.95	0.18	1.09	0.64	41.4
86	唐大军	男	寻常性银屑病	36	46	68	1.7	23.53	10	n	103	n	n	n	n	4.19	1.15	1.17	2.42	0.23	0.94	0.71	42
87	肖熙瑶	女	寻常性银屑病	12	16	65	1.4	33.16	4	n	114	n	n	n	n	3.64	1.26	1.17	1.83	0.25	1.04	0.6	42.12
88	王清兰	女	寻常性银屑病	4	34	44	1.6	17.19	12	n	122	n	n	n	n	5.76	1.25	1.31	3.96	0.25	1.3	1.07	42.4
89	闻剑峰	男	寻常性银屑病	5.4	36	64	1.76	20.66	2	n	114	n	n	n	n	5.89	1.78	1.1	2.8	0.38	0.93	1.03	42.4
90	苑金钟	男	寻常性银屑病	42	59	65	1.75	21.22	0.1	n	120	n	n	n	n	3.53	0.55	1.7	2.43	0.11	1.16	0.53	42.54
91	王兆甫	男	脓疱性银屑病	0.4	68	65	1.7	22.49	4	n	106	n	n	n	n	5.87	2.12	1.38	4.65	0.42	1.05	1.3	42.6
92	赵凤兰	女	红皮病性银屑病	24	67	61	1.64	22.68	40	n	131	y	n	y	y	3.09	0.6	0.84	2.6	0.12	1.41	0.83	42.71
93	高宇峰	男	斑块状银屑病	18	49	101	1.73	33.75	0.15	n	102	n	y	n	n	3.25	1.03	0.67	2.54	0.21	1.31	0.93	43.1
94	房艳明	男	寻常性银屑病	12	38	89	1.7	30.8	0.1	y	126	n	n	n	n	5.37	1.16	0.94	3.42	0.23	1.75	1.09	43.13
95	许成鑫	男	脓疱性银屑病	24	43	80	1.72	27.04	10	y	123	y	y	n	n	2.06	1.33	0.85	1.22	0.27	1.06	0.41	43.13
96	郭玉江	男	寻常性银屑病	12	57	85	1.76	27.44	0.1	n	116	n	n	y	y	4.96	1.09	1.09	3.18	0.22	0.89	1.04	43.2
97	刘桂青	女	关节病型银屑病	5.4	56	70	1.65	25.71	15	n	121	n	n	n	n	3.34	1.22	0.66	2	0.24	1.2	0.81	43.4
98	乔若男	女	寻常性银屑病	10.8	18	65	1.72	21.97	2	y	188	y	n	n	n	4.71	1.13	1.33	2.71	0.23	1.17	0.83	43.4
99	王宇飞	男	寻常性银屑病	8	33	110	1.72	37.18	40	n	110	n	n	n	n	3.82	0.95	0.95	2.37	0.19	1.29	0.74	43.76
100	王永生	男	寻常性银屑病	48	54	68	1.73	22.72	8	n	110	n	n	n	n	4.4	0.66	1.47	2.63	0.13	0.79	0.67	43.8
101	纪秀杰	女	寻常性银屑病	36	33	46	1.55	19.15	5	y	150	y	y	n	n	5.89	1.39	0.99	2.88	0.24	1.24	0.78	44.3
102	肖国文	男	寻常性银屑病	21.6	51	56	1.73	18.71	15	n	144	y	n	y	n	3.74	0.9	0.93	2.45	0.18	1.02	0.78	44.4
103	柏荣佳	男	寻常性银屑病	15.6	16	46	1.6	17.97	5	y	114	n	n	n	n	3.69	0.8	1.49	2.17	0.16	0.84	0.53	44.4
104	范爱国	男	红皮病性银屑病	20	72	60	1.6	23.44	1	n	126	n	n	n	n	4.03	1.76	0.85	2.65	0.35	1.02	0.81	44.6
105	徐凯文	男	寻常性银屑病	6	16	50	1.7	17.3	2	n	97	n	n	n	n	3.15	0.77	0.92	1.95	0.15	1.22	0.53	44.74
106	董彦龙	男	寻常性银屑病	12	29	85	1.72	28.73	40	n	98	n	n	y	n	4.64	1	1.13	3.01	0.2	1.05	0.91	44.87
107	陈义龙	男	银屑病	12	54	75	1.73	25.06	0.15	n	106	n	n	n	n	5.96	1.35	1.25	4.44	0.27	1.04	1.2	44.9
108	白永琴	女	银屑病	15	60	59	1.6	23.05	0.15	n	133	y	n	n	n	5.06	1.99	0.89	3.17	0.4	0.96	1.03	44.93
109	张丽艳	女	红皮病性银屑病	28	53	68	1.63	25.59	30	y	185	y	n	n	n	5.22	1.18	1.32	3.4	0.24	1.21	1.02	44.93
110	徐鹏达	男	寻常性银屑病	12	31	96	1.72	32.45	2	n	132	y	n	n	n	6.73	7.62	1.43	2.73	1.52	1.12	1.09	45.4
111	刘莹	女	寻常性银屑病	28	33	70	1.55	29.14	18	n	131	y	y	n	n	4.59	1.15	0.9	2.8	0.23	0.79	0.89	45.5
112	赵世纪	男	寻常性银屑病	15	18	60	1.79	18.73	20	n	119	n	n	n	n	4.18	1.43	1.07	2.39	0.29	1.42	0.8	45.74
113	魏新宇	女	脓疱性银屑病	12	27	51	1.57	20.69	0.1	y	155	y	n	n	n	5.12	1.65	1.12	3.03	0.33	1.12	0.89	46.06
114	李秀强	男	寻常性银屑病	3	56	83	1.77	26.49	5	n	118	n	n	n	n	3.27	0.49	0.9	2.07	0.1	0.96	0.59	46.12
115	肖杨	男	寻常性银屑病	45	27	59	1.64	21.94	0.1	n	102	n	n	n	n	3.38	0.86	0.91	2.12	0.17	0.97	0.59	46.4
116	陈永涛	男	关节型银屑病	24	41	75	1.72	25.35	30	y	135	y	n	n	n	4.32	1.2	0.73	2.87	0.24	1.22	0.85	46.4
117	张树海	男	银屑病	12	60	59	1.7	20.42	2	n	142	y	n	n	n	3.96	2.27	0.8	2.56	0.45	1.45	0.78	46.7
118	潘士华	女	银屑病	2.7	58	70	1.63	26.35	1	n	130	y	n	n	n	3.55	1.35	0.65	2.35	0.27	1.49	0.81	47.2
119	赵彦涛	男	脓疱性银屑病	15	38	55	1.75	17.96	30	n	141	y	n	n	n	2.34	0.73	0.51	1.5	0.15	0.9	0.59	47.6
120	赵学峰	男	脓疱性银屑病	48	30	95	1.74	31.38	3	n	144	y	n	n	n	4.02	1.11	1.5	2.45	0.22	1.17	1	47.7
121	李春黑	男	红皮病性银屑病	15	57	50	1.65	18.37	10	n	118	n	n	n	n	3.6	1.26	1.19	2.17	0.25	1.12	0.57	48.2
122	张航	男	脓疱性银屑病	6	30	71	1.8	21.91	10	n	135	y	n	n	n	3.74	0.91	0.7	2.43	0.18	1.37	0.81	48.4
123	田明月	女	寻常性银屑病	3	28	60	1.65	22.04	4	n	142	y	n	n	n	3.79	1	0.97	2.39	0.2	0.98	0.77	48.4
124	姜有田	男	关节病型银屑病	21.6	65	70	1.66	25.4	8	n	114	n	n	n	n	2.56	0.81	0.7	1.58	0.16	0.64	0.52	48.47
125	王永海	男	寻常性银屑病	36	53	60	1.74	19.82	0.1	n	112	n	n	n	n	4.88	1.25	1.26	2.96	0.25	1.26	0.88	48.5
126	朱丽贤	女	寻常性银屑病	48	66	80	1.65	29.38	30	y	133	y	y	n	n	4.88	1.25	1.26	2.96	0.25	1.12	0.88	48.6
127	李秀兰	女	关节型银屑病	3	49	67	1.55	27.89	2	y	150	y	y	n	n	5.63	1.14	1.1	3.5	0.23	1.18	1.23	48.7
128	李玉芝	女	脓疱性银屑病	5.4	60	75	1.6	29.3	0.15	y	187	y	n	n	n	4.82	2.67	1.45	3.09	0.53	1.05	0.75	48.8
129	梁湘菊	女	红皮病性银屑病	18	34	64	1.71	21.89	10	n	117	n	y	n	n	6.65	2.39	1.69	4.4	0.48	1.3	1.41	48.8
130	赵芮萌	男	银屑病	45	16	50	1.65	18.37	5	n	130	y	y	n	n	4.38	1.41	1.06	2.61	0.28	1.12	0.84	49.47
131	李晓刚	女	寻常性银屑病	21	31	83	1.68	29.41	0.1	n	138	y	n	n	n	6.7	1.61	1.39	3.86	0.32	1.09	1.25	49.27
132	陶风奎	男	寻常性银屑病	32	47	92.5	1.72	31.27	0.1	n	117	n	n	n	n	2.94	2.1	0.65	1.86	0.42	1.05	0.73	49.8
133	张春香	女	寻常性银屑病	48	61	65	1.6	25.39	1	n	123	n	n	n	n	5.04	1.33	1.03	3.04	0.27	1.55	1.12	49.9
134	史树国	男	红皮病性银屑病	32	51	63	1.68	22.32	2	n	135	y	n	n	n	3.99	1.75	0.9	2.52	0.35	1.39	0.84	49.8
135	王亚楠	女	泛发性脓疱型银屑病	24	32	60	1.68	21.26	8	n	133	y	n	n	n	2.83	0.53	0.82	1.64	0.11	1.04	0.52	50.09
136	柴永田	男	脓疱性银屑病	3	50	62	1.64	23.05	30	n	118	n	n	n	n	5.3	2.41	1.39	3.13	0.48	1.23	0.92	51.2
137	殷伟	女	红皮病性银屑病	18	34	66	1.58	26.44	0.5	n	121	n	n	n	n	4.96	0.9	1.05	3	0.18	1.41	0.85	51.45
138	王书本	男	寻常性银屑病	6	77	60	1.7	20.76	0.1	n	135	y	n	n	n	3.93	3.04	0.94	2.49	0.61	1.21	1.06	51.5
139	王作彦	男	寻常性银屑病	3	70	75	1.7	25.95	0.2	n	90	n	n	n	n	2.84	0.75	0.79	1.76	0.15	1.19	0.61	51.6
140	孔令君	男	寻常性银屑病	48	54	80	1.8	24.69	4	n	119	n	y	y	y	6.06	2.17	1.23	3.78	0.43	1.07	1.16	52.96
141	翟世萍	女	脓疱性银屑病	32	32	55	1.65	20.2	1	y	147	y	n	y	y	8.74	3.05	1.21	5.19	0.61	1.2	1.86	52
142	李曜盛	男	脓疱性银屑病	6	46	81	1.76	26.15	0.1	n	118	n	n	n	n	3.18	1.65	0.93	1.97	0.33	1.23	0.54	53.04
143	兰国申	男	寻常性银屑病	12	56	75	1.8	23.15	0.05	y	135	y	y	n	y	4.59	3.05	1.24	2.86	0.61	1.23	0.91	53.3
144	王丽华	女	红皮病性银屑病	12	56	82	1.66	29.76	8	n	136	y	y	n	y	4.17	1.94	0.75	2.68	0.39	0.75	0.79	53.6
145	梁延生	男	寻常性银屑病	18	36	72	1.78	22.72	2	n	138	y	n	n	n	3.75	2.25	0.77	2.53	0.45	1.11	0.8	53.8
146	齐少良	男	寻常性银屑病	18	55	63	1.7	21.8	20	n	133	y	n	n	n	4.8	2.18	0.87	3.04	0.44	0.83	1.09	53.86
147	黄丽华	女	寻常性银屑病	16	56	61	1.62	23.24	10	n	120	n	n	n	n	4.5	1.29	1.11	2.9	0.26	0.81	0.89	53.86
148	马连义	男	寻常性银屑病	23.1	65	82	1.67	29.4	20	n	129	n	n	y	n	4.35	1.54	1.03	2.96	0.31	1.39	0.88	54.13
149	马奎	男	寻常性银屑病	48	43	75	1.72	25.35	6	n	120	n	n	y	y	2.87	1.02	0.8	1.93	0.2	1.06	0.61	54.4
150	许平建	男	寻常性银屑病	4	59	79	1.84	23.33	30	y	146	y	y	n	n	5.36	3.26	1.24	3.12	0.65	1.01	1.1	54.13
151	姜淑花	女	寻常性银屑病	24	39	48	1.55	19.98	0.1	n	133	y	n	n	n	4.6	1.56	1.25	2.97	0.31	1.17	0.86	54.4
152	宋思维	女	红皮病性银屑病	10.8	37	61	1.57	24.75	20	n	114	n	n	y	y	4.13	3.01	0.98	2.63	0.6	1.1	0.77	54.43
153	白淑荣	女	寻常性银屑病	6	69	55	1.62	20.96	12	n	104	n	n	n	n	3.53	0.52	1.01	2.32	0.1	0.69	0.73	54.53
154	张国彦	男	寻常性银屑病	8	33	68	1.7	23.53	0.1	n	101	n	n	n	n	4.03	0.97	1.35	2.54	0.19	0.69	0.73	54.7
155	王长海	男	银屑病	12	73	48	1.65	17.63	8	n	112	n	n	n	n	7.19	5.04	1.5	3.99	1.01	0.78	1.33	55.14
156	苗旺权	男	寻常性银屑病	8	16	49	1.78	15.47	60	y	151	y	n	n	n	4.23	1.39	1.16	2.95	0.28	1.35	0.83	55
157	藏金珍	女	银屑病	14	53	67	1.68	23.74	3	n	102	n	n	n	n	3.68	1.02	1.32	2.27	0.2	0.66	0.58	55.21
158	王付春	男	寻常性银屑病	9	40	71	1.75	23.18	5	n	129	n	n	n	n	3.48	1.32	0.93	2.14	0.26	1.14	0.66	55.7
159	齐朕	男	寻常性银屑病	12	29	74	1.7	25.61	10	n	109	n	n	y	n	4.99	1.93	1.2	3.13	0.39	1.21	0.96	55.9
160	张宝通	男	寻常性银屑病	12	27	60	1.6	23.44	2	n	107	n	n	n	n	4.15	0.89	1.57	2.63	0.18	1.42	0.67	56
161	韩同娥	女	寻常性银屑病	12	62	63	1.55	26.22	5	n	144	y	n	n	n	5.1	2.84	0.88	3.36	0.57	1.23	1.08	56.01
162	李桂荣	女	泛发性脓疱型银屑病[L40.100x003]	12	79	57	1.58	22.83	0.15	n	146	y	n	n	n	6.12	1.02	1.95	4.09	0.2	1.84	1.08	56.2
163	王鑫	女	泛发性脓疱型银屑病[L40.100x003]	10	32	105.5	1.83	31.5	15	n	144	y	y	n	n	5.52	1.62	1.05	3.84	0.32	1.25	1.14	56.28
164	闫耀聪	男	寻常性银屑病	10	18	137	1.55	57.02	0.15	n	144	y	y	n	n	5.08	1.74	1.18	3.38	0.35	1.1	1.12	56.4
165	何洪娇	女	脓疱性银屑病	10	29	46	1.66	16.69	2	n	134	y	y	n	n	3.91	3.24	0.84	2.68	0.65	1.1	0.98	56.78
166	孙久成	男	寻常性银屑病	8	41	60	1.7	20.76	60	y	132	y	y	n	n	3.22	0.83	1.18	1.97	0.17	1.24	0.74	56.81
167	李会	男	寻常性银屑病	8	65	54	1.62	20.58	0.15	n	103	n	n	n	n	2.47	0.6	0.88	1.58	0.12	1.33	0.52	57.14
168	贾世民	男	红皮病性银屑病	18	64	60	1.66	21.77	0.5	n	120	n	n	y	n	4.43	1.62	0.94	2.86	0.32	1.18	0.98	57.4
169	申传岭	男	脓疱性银屑病	12	58	63	1.62	24.01	9	n	137	y	n	y	n	3.37	1.08	1.25	1.96	0.22	0.59	0.65	57.42
170	张玉波	女	红皮病性银屑病	13	65	65	1.65	23.88	20	y	143	y	n	n	n	2.3	1.18	0.66	1.63	0.24	1.34	0.66	57.47
171	崔志峰	男	寻常性银屑病	13	39	76	1.65	27.92	16	y	133	y	n	n	n	3.29	0.8	0.86	2.28	0.16	1.67	0.78	57.5
172	王德纯	男	寻常性银屑病	17	24	84	1.82	25.36	0.1	n	135	y	n	y	n	4.38	1.88	1.05	2.82	0.38	1.23	0.99	57.8
173	李晓刚	男	寻常性银屑病	15	31	84	1.72	28.39	20	y	152	y	n	n	n	3.94	1.38	1.05	2.65	0.28	1.06	0.81	57.9
174	苗雨芝	女	红皮病性银屑病	12	64	50	1.63	18.82	0.15	n	129	n	n	n	n	4.66	1.63	1.24	2.97	0.33	1.75	0.86	58.1
175	郑金荣	女	银屑病	13	32	45	1.6	17.58	2	n	121	n	n	n	n	2.52	0.58	0.78	1.58	0.12	1.06	0.45	58.39
176	许春明	男	寻常性银屑病	8	21	60	1.78	18.94	1	y	130	y	n	n	n	3.31	1.51	1.07	2.13	0.3	1.27	0.71	58.5
177	李维民	男	寻常性银屑病	13	57	63	1.59	24.92	6	n	96	n	n	n	n	4.85	0.54	1.88	2.93	0.11	1.54	0.69	58.6
178	苗刚	男	寻常性银屑病	15	40	90	1.7	31.14	10	n	100	n	n	y	n	4.46	1.4	0.95	3.05	0.28	1.14	1.03	59.2
179	周雨涵	女	滴状银屑病	12	30	66	1.68	23.38	0.5	n	138	y	n	y	n	3.17	0.91	1.04	2.09	0.18	1.16	0.64	58.8
180	柳佳娇	女	寻常性银屑病	12	43	63	1.6	24.61	0.1	n	110	n	n	n	n	4.09	0.98	0.93	2.83	0.2	1.22	0.75	59.7
181	周妮华	女	寻常性银屑病	10	34	87	1.66	31.57	0.15	n	138	y	n	n	n	5.38	5.66	1.05	2.97	1.13	0.98	1.13	59.7
182	田璐	女	寻常性银屑病	13	40	52	1.75	16.98	0.1	n	112	n	n	n	n	4.95	3.46	0.9	3.34	0.69	1.43	1.16	59.9
183	孙辰龙	男	寻常性银屑病	10	29	89	1.6	34.77	6	n	105	n	n	n	n	4.78	1.16	0.97	3.23	0.23	0.8	1.23	60.1
184	王英东	男	红皮病性银屑病	13	16	56	1.71	19.15	10	n	116	n	n	n	n	5.16	2.76	1.06	3.42	0.55	1.13	1.02	60.18
185	赵义	男	寻常性银屑病	9	55	87	1.69	30.46	0.1	n	118	n	n	n	n	4.83	1.3	1.2	3.31	0.26	0.96	0.95	60.7
186	陆志平	男	寻常性银屑病	12	49	106	1.78	33.46	7	n	131	y	n	n	n	2.48	0.49	0.86	1.6	0.1	1.4	0.42	60.72
187	李洪河	男	寻常性银屑病	17	48	54	1.65	19.83	30	n	142	y	n	n	n	3.49	1.96	0.44	2.54	0.39	1.39	0.9	60.85
188	赵蔚	女	寻常性银屑病	8	64	52	1.62	19.81	20	n	114	n	n	n	n	4.85	0.94	0.88	3.2	0.19	1.08	0.97	60.9
189	刘峰颖	男	寻常性银屑病	12	44	93	1.82	28.08	30	n	112	n	n	n	n	3.94	0.6	0.91	2.68	0.12	1.48	0.81	61.4
190	纪美雪	女	寻常性银屑病	8	21	75	1.67	26.89	30	n	130	y	y	y	n	4.73	3.27	0.85	3.19	0.65	1	1	60.9
191	张立忠	男	寻常性银屑病	12	48	85	1.63	31.99	7	n	115	n	n	n	n	5.02	1.27	1.4	2.07	0.17	1.01	0.58	61.6
192	崔建哲	男	寻常性银屑病	10	56	76	1.76	24.54	30	n	123	y	y	y	n	4.94	1.89	1.16	3.36	0.38	1.34	1.04	61.7
193	柏荣佳	男	泛发性脓疱型银屑病[L40.100x003]	20	16	41	1.7	14.19	0.15	n	145	y	n	y	n	6.41	2.41	1.04	4.4	0.48	1.32	1.18	62.2
194	李新滨	男	寻常性银屑病	12	58	61	1.68	21.61	40	n	106	n	y	n	y	5.19	1.46	1.27	3.27	0.29	1.44	0.85	62.4
195	刘文艳	女	寻常性银屑病	12	45	59	1.59	23.34	2	n	96	n	n	n	n	3.24	0.43	0.96	2.06	0.09	1.42	0.62	62.7
196	李春梅	女	寻常性银屑病	14	26	50	1.63	18.82	17	y	113	n	n	n	n	4.24	1.76	0.77	2.99	0.35	1.08	0.93	63.07
197	高楠楠	女	寻常性银屑病	8	25	61	1.6	23.83	20	y	212	y	n	y	y	3.21	0.58	1	1.94	0.12	1.21	0.57	62.9
198	陈伟琦	男	寻常性银屑病	13	20	90	1.73	30.07	0.1	n	115	n	n	n	n	7.09	4.11	1.62	4.45	0.82	1.26	1.17	63.2
199	王亚楠	女	泛发性脓疱型银屑病[L40.100x003]	12	32	62	1.68	21.97	0.1	n	114	n	n	n	n	3.87	0.89	1.21	2.41	0.18	1.17	0.66	63.22
200	蒋青龙	男	脓疱性银屑病	8	16	55	1.6	21.48	0.1	n	104	n	n	n	n	3.25	2.56	0.57	2.09	0.51	0.98	0.76	63.3
201	刘平	男	寻常性银屑病	25	50	80	1.6	31.25	0.1	n	112	n	n	n	n	3.66	0.88	1.22	2.36	0.18	1.13	0.62	63.3
202	李淑兰	女	寻常性银屑病	13	73	52	1.6	20.31	0.1	n	129	n	n	n	n	3.26	0.67	0.72	2.02	0.13	1.15	0.64	63.3
203	张艳如	女	寻常性银屑病	30	63	62	1.66	22.5	1.5	n	132	y	n	n	n	6.79	1.91	1.09	4.42	0.38	0.88	1.31	63.5
204	麦运涛	男	寻常性银屑病	18	63	80	1.65	29.38	10	y	164	y	n	n	n	4.89	1.38	1.2	3.21	0.28	0.74	0.83	63.57
205	王英军	男	寻常性银屑病	15	54	65	1.64	24.17	30	n	120	n	n	n	n	4.77	1.42	1.13	3.1	0.28	0.68	0.8	63.83
206	张学强	男	寻常性银屑病	13	45	79	1.62	30.1	0.1	n	118	n	n	n	n	4.33	0.52	1.59	2.14	0.1	1.01	0.64	64.07
207	邢春凯	男	寻常性银屑病	17	31	85	1.75	27.76	1	y	147	y	n	n	n	6.26	1.78	1.12	3.97	0.36	1.13	1.02	64.47
208	黄杰	女	寻常性银屑病	10	21	48	1.66	17.42	15	n	122	n	n	y	n	6.88	2.17	1.29	4.24	0.43	1.18	1.18	64.5
209	付永强	男	寻常性银屑病	5	50	75	1.7	25.95	22	y	162	y	n	n	n	3.92	0.87	1.06	2.75	0.17	1.4	0.75	64.5
210	王亮	男	寻常性银屑病	13	32	70	1.65	25.71	15	n	108	n	n	n	n	4.06	1.22	1.11	2.52	0.24	1.35	0.51	64.8
211	刘波	女	寻常性银屑病	12	41	67	1.5	29.78	0.15	y	160	y	n	n	n	5.7	3.73	0.91	3.53	0.75	1.31	0.77	64.56
212	裴蕾	女	寻常性银屑病	10	36	60	1.5	26.67	1	n	128	n	n	n	n	3.24	1.17	0.91	2.25	0.23	0.75	0.66	65.2
213	董荣敏	女	寻常性银屑病	13	62	56	1.55	23.31	2	n	118	n	n	n	n	4.15	0.54	1.37	2.46	0.11	1.17	0.68	65.5
214	宁柏先	男	寻常性银屑病	25	33	64	1.72	21.63	20	n	110	n	n	n	n	3.87	1.23	1.14	2.47	0.25	1.38	0.65	65.81
215	王宇航	女	寻常性银屑病	35	16	57	1.55	23.73	0.1	n	134	y	n	n	n	4.04	1.1	0.95	2.75	0.22	1.14	0.61	65.9
216	李秀兰	女	红皮病性银屑病	10	48	68	1.6	26.56	0.1	n	117	n	n	n	n	6.04	0.46	1.88	3.99	0.09	1.62	0.8	66.3
217	靳维山	男	关节型银屑病[L40.500x001+M07.3*]	17	60	70	1.75	22.86	0.5	n	112	n	n	n	n	4.27	0.97	1.21	2.81	0.19	1.13	0.56	66.4
218	谢国军	男	红皮病性银屑病	13	44	78	1.68	27.64	27	y	123	n	y	n	n	5.57	2.27	1.47	3.45	0.45	1.82	0.77	66.66
219	邵作发	男	寻常性银屑病	35	79	77	1.75	25.14	30	y	157	y	n	n	n	3.05	1.21	0.78	2.22	0.24	0.77	0.54	66.69
220	陆志平	男	寻常性银屑病	25	49	100	1.7	34.6	20	n	107	n	n	n	n	1.71	0.74	0.47	1.26	0.15	1.17	0.34	66.8
221	李晓刚	男	寻常性银屑病	17	31	83	1.7	28.72	25	y	144	y	n	n	n	3.77	2.56	1.03	2.72	0.51	1.24	0.63	66.8
222	许广友	男	关节病型银屑病	45	42	70	1.65	25.71	2	n	134	y	n	n	n	4.02	1.64	0.83	2.82	0.33	1.13	0.65	67.26
223	董丽微	女	寻常性银屑病	15	38	54	1.6	21.09	20	n	130	y	n	y	n	6.35	1.45	1.17	4.46	0.29	1.32	1.02	67.63
224	王朋	男	寻常性银屑病	8	22	103	1.83	30.76	20	n	123	n	n	n	n	3.57	1.15	0.76	2.57	0.23	1.14	0.64	67.76
225	张向阳	男	红皮病性银屑病	30	45	69	1.74	22.79	13	n	135	y	n	n	n	4.7	1.3	1.23	3.2	0.26	0.96	0.72	68
226	陈树民	男	寻常性银屑病	9	54	65	1.67	23.31	10	y	117	n	n	n	n	3.25	1.34	1.05	1.94	0.27	0.92	0.42	68
227	杨永祥	男	红皮病性银屑病	13	73	80	1.7	27.68	2	n	130	y	n	n	n	3.96	1.04	1.02	2.62	0.21	1.38	0.63	68
228	赫建兰	男	寻常性银屑病	10	24	65	1.68	23.03	5	n	137	y	y	y	n	4.13	1.36	1.09	2.89	0.27	1.33	0.64	68.3
229	李营	女	寻常性银屑病	45	35	83	1.6	32.42	40	y	116	y	n	n	n	4.1	4.41	0.89	2.64	0.88	1.15	0.79	68.4
230	刘巍巍	男	寻常性银屑病	8	38	77	1.68	27.28	0.6	n	120	n	n	n	n	3.89	0.85	1.25	2.67	0.17	0.81	0.53	68.6
231	金彦青	男	红皮病性银屑病	12	48	75	1.68	26.57	0.15	n	135	y	n	n	n	6.75	1.87	1	4.64	0.37	1	1.2	68.83
232	邓华	女	寻常性银屑病	35	60	61	1.68	21.61	0.1	n	122	n	n	y	n	3.11	1.74	0.63	2.16	0.35	1.23	0.51	68.86
233	吴桂芳	女	寻常性银屑病	35	71	75	1.62	28.58	29	n	126	n	n	n	n	3.3	0.96	0.79	2.39	0.19	1.23	0.85	68.98
234	张显龙	男	红皮病性银屑病	12	55	81	1.65	29.75	10	y	169	y	n	n	n	4.33	1.54	1.06	2.76	0.31	0.92	0.75	69.33
235	刘家利	女	寻常性银屑病	13	34	55	1.67	19.72	30	y	151	y	n	n	n	5.11	1.5	1.14	3.42	0.3	1.54	1.03	69.48
236	栾秀娟	女	寻常性银屑病	15	44	53	1.62	20.2	30	y	129	n	n	y	y	2.78	1.05	0.74	1.94	0.21	1.19	0.68	69.8
237	伭玥	女	寻常性银屑病	20	30	59	1.6	23.05	0.1	n	99	n	n	n	n	5.33	1.17	1.11	3.5	0.23	1.08	1.03	69.8
238	林辉	男	寻常性银屑病	13	50	60	1.72	20.28	13	n	100	n	n	n	n	4.02	1.53	1	2.76	0.31	1.06	0.84	70.3
239	王新蕊	女	红皮病性银屑病	12	18	60	1.53	25.63	0.15	n	93	n	n	n	n	5.68	1.82	1.49	3.82	0.36	1.04	1.08	70.6
240	张春香	女	脓疱性银屑病	12	61	61	1.6	23.83	1	n	119	n	n	y	n	3.14	0.71	0.8	2.21	0.14	1.39	0.69	70.81
241	刘书成	男	寻常性银屑病	60	60	68	1.75	22.2	40	n	123	n	n	y	y	2.92	0.97	0.81	1.98	0.19	1.28	0.71	71
242	刘志安	男	寻常性银屑病	12	55	79	1.76	25.5	6	n	116	n	n	n	n	3.37	1.29	0.82	2.08	0.26	1.06	0.75	71.2
243	曾桂玲	女	脓疱性银屑病	48	55	85	1.62	32.39	0.1	n	122	n	n	n	n	5.46	0.96	1.18	3.76	0.19	1.29	1.12	71.6
244	徐野舰	男	红皮病性银屑病	8	21	90	1.7	31.14	13	n	121	n	y	n	n	6.71	2.33	1.33	4.39	0.47	1.06	1.31	71.6
245	刘海军	男	滴状银屑病	12	24	84	1.78	26.51	8	y	121	y	y	n	n	3.35	1.14	1.11	2.13	0.23	1.21	0.64	71.9
246	倪亚权	男	寻常性银屑病	3	40	80	1.8	24.69	12	n	127	n	n	n	n	3.77	3.45	0.86	2.43	0.69	1.03	0.68	71.8
247	王宇飞	男	寻常性银屑病	42	32	112	1.72	37.86	0.1	n	132	y	n	n	n	4.53	1.72	1.12	3.02	0.34	1.09	0.91	71.9
248	王可强	男	红皮病性银屑病	18	38	69	1.77	22.02	0.5	n	118	n	n	y	n	4.59	0.95	0.75	3.15	0.19	1.02	1.05	72.8
249	刘立新	女	滴状银屑病	6	30	70	1.6	27.34	4	y	151	y	n	n	n	5.54	3.98	0.85	3.91	0.8	0.74	0.9	72.2
250	张维平	男	脓疱性银屑病	35	56	82	1.68	29.05	0.02	n	126	n	n	n	n	4.13	2.03	0.79	2.89	0.41	1.15	0.96	72.8
251	高洪君	男	寻常性银屑病	10.8	44	86	1.7	29.76	0.1	n	123	n	y	n	n	3.16	1.17	0.94	2.18	0.23	1.17	0.65	72.8
252	韩文帅	男	寻常性银屑病	24	19	75	1.77	23.94	40	y	154	y	y	y	y	5.87	1.29	1.34	4.03	0.26	0.82	1.23	73.06
253	于淑凤	女	寻常性银屑病	12	39	55	1.62	20.96	20	n	115	n	n	n	n	4.8	2.14	0.87	3.19	0.43	1.09	1.14	73.1
254	李丙金	男	红皮病性银屑病	1.8	71	85	1.64	31.6	0.1	n	112	n	n	n	n	3.49	0.96	1	2.3	0.19	1.09	0.64	73.1
255	潘凤波	男	泛发性脓疱型银屑病[L40.100x003]	2.4	51	77	1.7	26.64	10	n	128	n	n	n	n	5.06	1.81	1.08	3.57	0.36	1.04	1.06	74.4
256	崔继平	男	寻常性银屑病	15	30	70	1.72	23.66	14	y	166	y	n	n	n	4.24	1.81	0.87	2.92	0.36	1.76	1.07	74.5
257	张博	女	泛发性脓疱型银屑病	8	25	49	1.62	18.67	4	n	124	n	n	n	n	4.88	1.03	0.87	3.35	0.21	1.59	1.07	74.63
258	于淑贤	女	脓疱性银屑病	36	66	52	1.56	21.37	12	n	107	n	n	n	n	3.2	0.88	1.22	1.93	0.18	1.02	0.48	74.74
259	刘大山	男	寻常性银屑病	21	28	96	1.54	40.48	1	y	136	y	n	n	n	4.73	1.14	1.23	3.15	0.23	1.45	0.73	74.8
260	宋思维	女	红皮病性银屑病	12	36	56	1.78	17.67	8	n	134	y	n	n	n	5.8	1.18	1.33	3.87	0.24	1	1.15	74.85
261	李广胜	男	寻常性银屑病	40	46	82	1.8	25.31	10	n	127	n	n	n	n	5.8	2.26	1.1	3.81	0.45	1.01	0.88	74.98
262	李鸿达	女	寻常性银屑病	24	21	58	1.76	18.72	11	n	113	n	n	n	n	5.21	0.87	1.21	3.47	0.17	1.37	0.77	75
263	贲彦龙	男	寻常性银屑病	18	30	80	1.74	26.42	20	n	118	n	n	n	n	5.6	1.01	1.34	3.85	0.2	1.01	0.9	75.1
264	张丽敏	女	寻常性银屑病	10	28	58	1.68	20.55	0.1	n	120	n	n	n	n	4.46	2.7	0.99	3.07	0.54	1.4	0.9	75.24
265	马士晶	女	寻常性银屑病	8	60	73	1.65	26.81	0.1	n	122	n	n	n	n	4.73	1.27	1.08	3.05	0.25	1.43	0.65	75.1
266	杨忠和	男	寻常性银屑病	24	60	102	1.65	37.47	5	n	109	n	n	n	n	3.91	0.56	1.25	2.68	0.11	2.03	0.67	75.7
267	李莉	女	寻常性银屑病	18	32	74	1.68	26.22	0.15	n	113	n	n	n	n	4.23	1.64	1.09	2.88	0.33	1.66	0.8	75.6
268	曹莲蓉	女	寻常性银屑病	8	76	68	1.65	24.98	20	n	124	n	n	n	n	4.15	3.08	0.86	2.7	0.62	1.23	0.68	75.4
269	刘东生	男	红皮病性银屑病	18	35	96	1.8	29.63	20	y	111	n	y	n	n	4.89	1.67	0.69	3.56	0.33	1.25	1.09	75.92
270	王会富	男	寻常性银屑病	45	42	71	1.7	24.57	0.02	y	150	y	n	n	n	6.51	1.73	1.3	4.44	0.35	1.18	1.19	76.57
271	王福生	男	寻常性银屑病	8	53	74	1.7	25.61	14	y	181	y	y	n	n	5.04	4.49	0.79	3.27	0.9	0.96	1.09	76.3
272	朱明芹	女	寻常性银屑病	4	63	80	1.62	30.48	1	n	111	n	y	n	n	4.35	0.96	0.96	2.99	0.19	1.52	0.89	76.6
273	程革	男	脓疱性银屑病	28	51	48	1.65	17.63	40	y	133	y	n	y	n	3.41	1.85	1.28	2.08	0.37	0.99	0.51	77.6
274	于宝昌	女	红皮病性银屑病	2.4	67	69	1.66	25.04	30	n	141	y	y	n	n	4.59	2.22	1.27	2.9	0.44	1.49	0.78	76.6
275	马亮	男	红皮病性银屑病	6	29	61	1.7	21.11	2	n	126	n	n	n	n	5.03	0.75	1.21	3.54	0.15	1.36	1.01	77.66
276	戴长青	男	寻常性银屑病	28	54	74	1.7	25.61	20	y	163	y	n	n	n	3.29	1.24	0.77	2.29	0.25	1.16	0.71	77.84
277	郭彦文	女	寻常性银屑病	6	62	71	1.58	28.44	13	n	109	n	n	n	n	3.51	0.89	0.68	2.41	0.18	1.14	0.75	77.9
278	汪录	女	寻常性银屑病	8	61	54	1.75	17.63	10	n	121	n	n	n	n	4.56	1.54	1.03	2.96	0.31	1.04	0.88	77.91
279	刘波	男	寻常性银屑病	4	30	62	1.8	19.14	50	n	135	y	n	n	n	5.92	1.33	1.54	3.77	0.27	1.2	1.08	78.16
280	李远红	女	寻常性银屑病	48	32	59	1.63	22.21	5	n	130	y	n	n	n	3.34	0.78	0.92	2.16	0.16	1.05	0.6	78.57
281	牛思雨	女	寻常性银屑病	12	21	50	1.68	17.72	2	n	119	n	n	n	n	3.87	0.52	1.04	2.58	0.1	1.32	0.7	78.93
282	张焕民	男	脓疱性银屑病	9	64	70	1.62	26.67	2	n	102	n	n	n	n	3.8	0.5	1.03	2.6	0.1	1.61	0.69	79.25
283	徐广才	男	寻常性银屑病	8	63	84	1.7	29.07	30	y	110	y	y	y	y	5.5	2.46	0.91	3.68	0.49	0.97	1.17	79.25
284	马彤彤	女	寻常性银屑病	5	28	50	1.65	18.37	0.1	n	99	n	n	n	n	3.91	1.29	1.17	2.52	0.26	1.12	0.74	79.4
285	王风霞	女	寻常性银屑病	45	44	62	1.65	22.77	30	n	136	y	n	n	n	2.71	0.89	0.97	1.76	0.18	1.01	0.5	79.85
286	宋双利	男	寻常性银屑病	18	57	60	1.57	24.34	0.1	n	115	n	n	n	n	4.61	3.42	0.89	3	0.68	1.05	0.89	79.9
287	奚军	男	寻常性银屑病	12	57	70	1.65	25.71	20	n	112	n	n	n	n	3.33	0.75	0.98	2.01	0.15	1.12	0.57	80
288	张阁宇	女	寻常性银屑病	10	22	75	1.63	28.23	5	n	115	n	n	n	n	4.28	2.08	1.1	2.77	0.42	1.29	0.8	79.96
289	闫亚贤	男	寻常性银屑病	6	33	85	1.8	26.23	0.1	n	146	y	y	n	n	5.87	2.16	1.33	3.81	0.43	1.35	1.18	80.08
290	刘文富	男	银屑病,其他的	18	46	72	1.63	27.1	20	y	160	y	n	y	y	6.8	2.76	1.74	4.18	0.55	1.02	1.21	80.2
291	秦天杰	男	斑状副银屑病	48	27	66.5	1.65	24.43	0.05	n	123	n	n	y	n	3.91	0.6	1.29	2.33	0.12	1.12	0.64	80.9
292	曲佰利	男	寻常性银屑病	7	46	72	1.74	23.78	0.05	n	132	y	n	n	n	4.59	2.02	0.92	2.98	0.4	1.29	0.97	80.3
293	王庆国	男	红皮病性银屑病	6	60	100	1.76	32.28	0.05	n	112	n	n	y	n	6.07	1.44	1.74	3.62	0.29	1.07	1.11	81
294	李琦	男	寻常性银屑病	48	32	97	1.68	34.37	18	n	120	n	n	n	n	2.87	3.51	0.7	1.77	0.7	0.88	0.46	81.1
295	丁童	女	寻常性银屑病	18	36	95	1.6	37.11	5	n	116	y	y	n	n	2.92	1.39	0.75	1.87	0.28	1.14	0.68	81.6
296	苑金钟	男	脓疱性银屑病	12	57	57	1.65	20.94	0.1	n	126	n	n	n	n	6.37	1.78	1.36	4.18	0.36	1.01	1.27	82
297	姚金宝	男	寻常性银屑病	4.8	43	58	1.65	21.3	20	n	119	n	y	n	n	4.71	2.29	0.82	3.07	0.46	1.12	1.07	82.2
298	刘春芝	女	脓疱性银屑病	12	53	47	1.59	18.59	0.05	n	115	n	n	n	n	5.47	1.81	1.01	3.68	0.36	1.55	1.2	82.2
299	刘志强	男	寻常性银屑病	18	26	86	1.75	28.08	40	n	135	y	n	n	n	3.13	0.46	0.81	2.06	0.09	1.39	0.73	82.4
300	徐爱英	女	寻常性银屑病	12	35	60	1.66	21.77	4	n	98	n	n	y	n	3.65	2.42	0.5	2.5	0.48	1	1.04	82.4
301	尹德文	男	红皮病性银屑病	5.2	71	66	1.73	22.05	10	n	126	n	n	n	n	3.59	1.1	0.82	2.35	0.22	1.51	0.75	82.55
302	孙玉丽	女	寻常性银屑病	12	51	52	1.68	18.42	0.8	y	93	n	n	n	n	3.12	1.03	0.95	1.96	0.21	1.35	0.58	82.98
303	晁思军	男	脓疱性银屑病	12	50	50	1.61	19.29	40	n	92	n	n	n	n	3.67	2.98	0.56	2.41	0.6	1	0.76	83.1
304	王淑霞	女	脓疱性银屑病	18	66	80	1.58	32.05	40	n	96	n	n	n	n	3.86	0.65	1.42	2.54	0.13	1.45	0.68	83.38
305	王宝生	男	寻常性银屑病	15	42	100	1.85	29.22	0.5	n	99	n	y	n	n	5.19	1.26	1.19	3.42	0.25	1.44	1.24	84
306	李兆江	男	关节病型银屑病	12	57	80	1.8	24.69	30	y	131	y	y	n	n	4.1	1.78	0.74	2.76	0.36	1.48	1.09	84.03
307	刘明	男	银屑病	10	38	62	1.56	25.48	5	n	127	n	n	n	n	4.58	1.71	1.28	2.9	0.34	1.32	0.95	85
308	李明辉	男	红皮病性银屑病	3	48	59	1.58	23.63	20	n	165	y	n	y	n	3.69	0.92	1.28	2.28	0.18	1.38	0.68	84.03
309	惠秀兰	女	寻常性银屑病	45	77	70	1.6	27.34	5	n	116	n	n	n	n	3.64	0.51	1.45	2.2	0.1	0.94	0.62	85.8
310	于洋	女	寻常性银屑病	18	25	63	1.68	22.32	10	n	129	y	n	n	n	5.08	2.48	1.48	3.26	0.5	1.29	0.96	85.69
311	赵吉春	男	寻常性银屑病	12	51	80	1.73	26.73	15	n	130	y	n	y	y	3.01	1.02	1.08	1.98	0.2	1.48	0.57	85.1
312	王刚	男	寻常性银屑病	18	33	75	1.6	29.3	2	y	147	y	n	n	n	5	1.87	1.08	3.24	0.37	1.25	1.13	85.8
313	王新蕊	女	寻常性银屑病	12	17	60	1.6	23.44	10	y	109	n	n	n	n	3.3	1.53	1.01	2.14	0.31	1.2	0.68	85.9
314	韩影	女	寻常性银屑病	12	30	44	1.64	16.36	7	n	128	n	n	n	n	4.04	0.8	1.18	2.52	0.16	1.01	0.76	86.14
315	乔征艳	女	寻常性银屑病	12	37	54	1.6	21.09	5	n	111	n	n	n	n	3.86	0.96	1.21	2.33	0.19	1.03	0.65	86.8
316	陈厚民	男	寻常性银屑病	4	49	73	1.68	25.86	10	n	94	n	n	n	n	2.54	0.79	1.45	1.39	0.16	1.22	0.24	86.8
317	宗淑艳	女	寻常性银屑病	4	50	60	1.62	22.86	6	y	157	y	y	n	n	5.2	3.11	0.89	2.77	0.62	1.23	0.8	86.8
318	关福鑫	男	寻常性银屑病	4	21	56	1.54	23.61	0.05	n	104	n	n	n	n	5.88	1.1	1.56	3.67	0.22	1.17	1.04	87.2
319	鲁亚忠	男	寻常性银屑病	45	47	70	1.6	27.34	3	y	113	n	n	n	n	7.51	3.42	1.68	3.99	0.68	1.2	1.3	87.2
320	辛宝洪	男	寻常性银屑病	6	37	70	1.6	27.34	12	n	105	n	n	y	n	3.69	1.5	0.88	2.16	0.3	1.06	0.68	87.3
321	张志明	男	寻常性银屑病	5.4	25	85	1.57	34.48	0.1	n	128	n	n	n	n	3.52	0.62	1.49	2.04	0.12	1.45	0.53	88.1
322	栾鹏	男	寻常性银屑病	2.4	52	67	1.8	20.68	28	n	118	n	n	n	n	3.76	0.92	0.95	2.32	0.18	1.97	0.79	88.4
323	郝士朋	男	脓疱性银屑病	3	89	55	1.65	20.2	1.5	n	126	n	n	n	n	4.51	0.82	1.15	2.76	0.16	1.32	0.88	88.69
324	王辉	男	寻常性银屑病	14	50	86	1.76	27.76	0.1	n	125	n	n	n	n	6.06	1.44	1.23	3.77	0.29	1.14	1.22	88.7
325	李寿娟	女	脓疱性银屑病	8	54	77.5	1.53	33.11	0.5	n	105	n	n	n	n	2.48	0.76	0.61	1.48	0.15	1.21	0.59	88.7
326	徐庆龙	男	脓疱性银屑病	45	37	60	1.74	19.82	30	n	132	y	n	y	y	3.77	3.3	0.86	2.44	0.66	1.33	0.74	88.9
327	武国伦	男	寻常性银屑病	24	30	98	1.6	38.28	7	n	145	y	y	n	n	2.75	1.18	0.76	1.77	0.24	1.25	0.68	89.1
328	王庆臣	女	银屑病	12	59	65	1.68	23.03	0.02	n	118	n	n	n	n	5.41	1.08	1.47	3.31	0.22	1.21	0.99	89.6
329	王秀芳	男	脓疱性银屑病	6	49	68	1.7	23.53	13	n	119	n	n	n	n	3.45	0.89	0.8	2.31	0.18	1.06	0.81	89.3
330	汤彦	男	银屑病	8	60	65	1.56	26.71	11	n	111	n	n	n	n	4.57	1.82	0.85	2.95	0.36	1.31	1.07	89.81
331	王志军	男	寻常性银屑病	14	50	73	1.7	25.26	0.1	n	113	n	n	y	n	4.67	0.95	1.57	2.65	0.19	1.14	0.73	89.9
332	王恒瑞	男	红皮病性银屑病	14	57	51	1.7	17.65	1	y	139	y	n	n	n	5.18	1.66	0.86	3.16	0.33	1.28	1.21	90.09
333	杨桂云	女	寻常性银屑病	12	63	61	1.7	21.11	37	n	135	y	n	n	n	3.49	1.33	1.05	2.24	0.27	1.13	0.72	90.4
334	李淑梅	女	寻常性银屑病	12	57	52	1.67	18.65	30	n	126	n	n	n	n	3.29	1.55	0.99	2.14	0.31	0.86	0.64	90.5
335	李新滨	男	红皮病性银屑病	14	58	60	1.78	18.94	0.15	n	134	y	n	n	n	6.46	1.63	2.1	3.76	0.33	1.09	0.96	90.5
336	李佳伟	男	寻常性银屑病	12	16	61	1.58	24.44	14	y	160	y	y	n	n	5.27	1.68	1.68	3.12	0.34	0.8	0.86	91
337	任桂芝	女	寻常性银屑病	12	63	73	1.75	23.84	20	y	175	y	n	n	n	3.92	0.81	1.37	2.2	0.16	1.16	0.65	91.12
338	宋双利	男	寻常性银屑病	12	57	57	1.6	22.27	0.1	n	101	n	n	n	n	3.02	0.67	1.04	1.72	0.13	1.04	0.48	91.3
339	胡万权	男	红皮病性银屑病	48	16	57	1.67	20.44	13	n	136	y	y	n	n	6.2	1.41	1.69	3.67	0.28	0.88	1.09	91.7
340	李鹏	男	寻常性银屑病	48	30	99	1.63	37.26	20	n	105	n	y	n	n	5.86	1.1	1.44	3.41	0.22	1	1.16	92
341	邵正凯	男	银屑病性关节炎	10	39	80	1.62	30.48	1	n	113	n	n	n	n	4.06	0.38	1.5	2.27	0.08	1.24	0.57	91.95
342	张君	女	寻常性银屑病	48	63	62	1.55	25.81	10	n	122	n	n	y	n	4.01	1.96	0.81	2.54	0.39	1.54	0.98	92.3
343	刘立宇	女	寻常性银屑病	8	36	75	1.8	23.15	19	n	115	n	n	n	n	5.28	1.16	1.41	3.56	0.23	1.11	1.01	92.3
344	孙丽萍	女	寻常性银屑病	48	43	68	1.64	25.28	3	y	160	y	y	n	n	5.25	1.22	1.62	3.12	0.24	1.14	0.95	92.46
345	孙占霞	女	泛发性脓疱型银屑病	12	55	50	1.59	19.78	10	n	103	n	y	n	n	4.3	1.13	1.26	2.68	0.23	0.96	0.83	92.78
346	姚尊利	男	寻常性银屑病	12	36	55	1.59	21.76	0.05	n	123	n	n	n	n	3.56	1.78	1.46	2.11	0.36	1.23	0.6	93
347	孙景义	男	银屑病	10.8	60	73	1.68	25.86	10	n	90	n	n	n	n	3.99	1.73	0.89	2.27	0.35	1.37	0.93	93.2
348	刘文福	男	寻常性银屑病	12	57	75	1.7	25.95	0.15	n	114	n	n	n	n	3.69	1.71	1.27	2.19	0.34	1.37	0.67	93.9
349	于存海	男	寻常性银屑病	18	50	91	1.88	25.75	30	y	153	y	y	n	y	3.66	1.37	1.36	2.16	0.27	1.13	0.52	93.9
350	刘磊	男	寻常性银屑病	12	39	69	1.66	25.04	40	n	140	y	n	n	y	5.16	1.48	1.36	3.03	0.3	0.83	1.16	94.04
351	李祥奎	男	银屑病	12	50	80	1.7	27.68	11	n	122	n	n	n	n	5.8	0.77	1.46	3.5	0.15	1.14	1.19	94.6
352	孙月英	女	银屑病	8	59	55	1.61	21.22	0.05	y	120	y	y	n	n	5.8	1.19	1.49	3.29	0.24	0.8	1.16	94.91
353	刘宗鑫	男	寻常性银屑病	12	24	65	1.6	25.39	0.7	n	142	y	n	n	n	5.17	1.1	1.51	2.91	0.22	1.08	0.98	95.2
354	盛百刚	男	寻常性银屑病	12	63	74	1.71	25.31	0.05	n	105	n	n	n	n	3.09	0.53	1.22	1.77	0.11	1.05	0.49	95.91
355	郑志伟	男	银屑病	8	41	68	1.6	26.56	10	y	152	y	y	n	n	5.64	0.79	2.21	3.07	0.16	1.37	0.93	95.5
356	单泽军	男	掌跖脓疱性银屑病	4	54	62	1.74	20.48	0.4	n	102	n	n	n	n	5.16	0.85	1.25	3.18	0.17	0.83	1.13	96.48
357	关成珍	女	寻常性银屑病	35	67	60	1.7	20.76	0.15	y	178	y	n	y	n	4.36	1.51	0.98	2.77	0.3	1.23	1.08	96.5
358	程远坤	男	滴状银屑病	32	22	78	1.57	31.64	0.5	n	145	y	n	y	n	4.3	0.9	1.16	2.65	0.18	0.97	0.89	97.3
359	高青	男	泛发性脓疱型银屑病	6	43	75	1.74	24.77	0.05	n	129	n	n	n	n	2.63	0.5	1.32	1.54	0.1	1.6	0.4	97.61
360	吕梓鑫	男	寻常性银屑病	12	19	66	1.73	22.05	0.6	y	152	y	y	n	n	5.58	3.12	1.29	3.44	0.62	0.96	1.3	98.16
361	鲁亚忠	男	红皮病性银屑病	28	46	69	1.75	22.53	3	y	190	y	n	n	n	3.73	1.01	1.46	2.16	0.2	0.76	0.72	98.3
362	盛守柱	男	脓疱性银屑病	6	34	60	1.75	19.59	0.5	n	131	y	n	n	n	2.12	1.5	0.45	1.4	0.3	1.5	0.5	98.44
363	王淑清	女	寻常性银屑病	6	61	75	1.6	29.3	17	n	125	n	n	n	n	3.96	0.65	1.25	2.26	0.13	1.04	0.75	98.5
364	谷金龙	男	银屑病	12	66	71	1.6	27.73	18	n	145	y	n	n	n	4.15	1.96	1.11	2.28	0.39	1.23	0.67	98.7
365	唐大军	男	脓疱性银屑病	8	44	67	1.73	22.39	30	n	138	y	y	n	n	5.58	4.15	1.18	3.4	0.83	1.75	1.11	98.9
366	鞠秀成	男	寻常性银屑病	6	27	90	1.63	33.87	28	n	132	y	n	n	n	4.53	1.15	1.22	2.69	0.23	0.89	0.92	98.9
367	孙美琪	女	寻常性银屑病	24	24	57	1.62	21.72	8	n	103	n	n	y	n	3.4	1.52	1.66	2.59	0.3	1.47	0.85	98.97
368	潘涤尘	男	寻常性银屑病	45	79	62	1.67	22.23	0.02	n	109	n	n	n	n	5.2	3.37	1.84	2.86	0.67	1.37	0.83	99.1
369	邵元春	女	红皮病性银屑病	12	52	95	1.81	29	0.05	y	185	y	y	n	n	4.77	1.75	1.03	2.98	0.35	0.92	1.1	98.98
370	靳宝玉	男	寻常性银屑病	48	56	80	1.62	30.48	20	n	141	y	y	n	n	2.75	1.05	1.27	1.46	0.21	1.11	0.31	99.4
371	王树媛	女	寻常性银屑病	18	48	60	1.63	22.58	22	y	113	n	n	n	n	3.12	1.21	0.67	1.96	0.24	1.35	0.85	100
372	赵海洋	男	寻常性银屑病	12	55	80	1.7	27.68	60	y	153	y	n	y	y	5	1.25	1.06	2.96	0.25	1.05	1.16	99.1
373	刘丽波	男	寻常性银屑病	48	40	55	1.6	21.48	23	n	116	n	n	n	y	5.37	1.92	1.01	3.31	0.38	0.88	0.99	100.42
374	王山	女	红皮病性银屑病	18	63	76	1.6	29.69	0.05	y	155	y	y	n	n	4.7	1.66	1.1	2.78	0.33	1.23	1.01	100.2
375	邵正凯	男	银屑病性关节炎	15	39	80	1.63	30.11	20	n	120	n	n	n	n	3.77	2.18	1.15	2.14	0.44	0.88	0.67	100.5
376	孟庆喜	女	银屑病	4.8	47	82	1.65	30.12	0.05	y	168	y	y	n	n	5.64	2.17	1.12	3.43	0.43	0.87	1.34	100.45
377	赵勇	男	寻常性银屑病	12	41	66	1.7	22.84	19	n	120	n	n	n	n	6.06	1.73	1.38	3.62	0.35	1.15	1.19	100.6
378	徐文龙	男	寻常性银屑病	9	38	71	1.7	24.57	18	y	157	y	n	y	n	6.42	2.92	1.2	3.73	0.58	1.24	1.32	100.86
379	姚雷	男	寻常性银屑病	6	27	60	1.72	20.28	15	y	147	y	y	n	n	6.12	2	1.16	3.66	0.4	0.95	1.41	101.8
380	杨春刚	男	寻常性银屑病	45	28	69	1.74	22.79	4	n	108	n	n	n	n	4.33	0.55	1.26	2.42	0.11	1.08	0.86	101.9
381	王龙	男	斑块状银屑病	12	39	135	1.7	46.71	7	n	102	n	n	y	n	4.5	1.95	1.68	2.43	0.39	1.09	0.75	102
382	李生	男	红皮病性银屑病	45	43	85	1.64	31.6	0.01	n	110	n	n	n	n	4.3	1.21	1.34	2.48	0.24	0.84	0.9	102
383	王京	女	寻常性银屑病	10	24	48	1.65	17.63	5	n	120	n	n	y	n	4.03	1.8	0.88	2.34	0.34	1.21	0.9	103.1
384	张丽娜	女	寻常性银屑病	8	37	60	1.63	22.58	18	n	124	n	y	n	n	3.94	1.69	0.73	2.26	0.34	1.32	1.01	103.2
385	史悦彤	女	寻常性银屑病	12	16	70	1.6	27.34	0.05	n	101	n	n	n	n	5.42	1.83	1.67	3.07	0.37	1.07	0.98	103.78
386	李梦桃	女	银屑病	25	16	72	1.6	28.13	15	n	123	n	n	n	n	4.26	0.65	1.07	2.51	0.13	1.37	0.99	103.9
387	司马羽健	男	银屑病	12	16	80	1.65	29.38	6	n	120	n	n	n	n	3.63	0.74	1.28	2.15	0.15	1.01	0.65	103.9
388	李浩楠	男	寻常性银屑病	12	17	61	1.78	19.25	7	n	111	n	n	n	n	4.29	1.22	1.24	2.5	0.24	0.86	0.77	104.2
389	张晶	女	红皮病性银屑病	20	20	60	1.65	22.04	1	n	134	y	n	n	n	3.9	0.77	1.21	2.23	0.15	1.46	0.65	104.48
390	娄立伟	女	寻常性银屑病	18	18	56	1.5	24.89	14	n	96	n	n	n	n	3.37	0.9	0.85	1.99	0.18	1.65	0.7	105.2
391	于德荣	男	寻常性银屑病	10	16	47	1.66	17.06	3	n	110	n	n	n	n	2.82	0.96	1.14	1.67	0.19	1.86	0.47	105.1
392	王立新	女	红皮病性银屑病	12	39	70	1.66	25.4	0.1	n	125	n	n	n	n	5.05	0.63	1.78	2.91	0.13	1.58	0.87	105.35
393	陈浩	男	寻常性银屑病	13	16	80	1.73	26.73	0.1	n	107	n	n	n	n	4.72	1.29	1.59	2.82	0.26	1.09	0.58	105.4
394	阚立颖	女	寻常性银屑病	15	22	55	1.65	20.2	23	n	131	y	n	n	n	4.79	3.01	1.09	2.75	0.6	1.24	0.98	105.4
395	刘春芝	女	红皮病性银屑病	12	52	57	1.58	22.83	0.5	n	104	n	n	n	n	3.1	0.7	0.93	1.82	0.14	1.57	0.33	105.7
396	王宇飞	男	寻常性银屑病	18	31	114	1.9	31.58	0.1	n	104	n	n	n	n	3.52	0.55	1.25	2.17	0.11	0.92	0.7	106.2
397	郭福良	男	红皮病性银屑病	17	47	60	1.72	20.28	10	n	138	y	y	y	n	5.22	2.65	0.95	3.11	0.53	0.96	1.12	106.29
398	李文玉	男	寻常性银屑病	22	59	72	1.59	28.48	3	n	142	y	y	n	n	6.34	1.55	1.07	3.93	0.79	1.31	1.27	106.3
399	翟浩东	男	寻常性银屑病	18	19	62	1.6	24.22	20	n	126	n	n	y	n	3.44	2.55	0.95	2.13	0.31	1.62	0.77	107.58
400	刘强	男	寻常性银屑病	15	23	59	1.55	24.56	10	n	137	y	y	n	n	3.41	0.63	1.26	2.02	0.13	1.43	0.73	108.1
401	王玉兰	女	寻常性银屑病	13	73	55	1.6	21.48	0.5	n	114	n	n	y	n	2.57	0.36	0.82	1.54	0.07	1.09	0.48	108.4
402	宋君林	男	红皮病性银屑病	8	59	72	1.74	23.78	0.1	n	114	n	n	n	n	3.04	0.62	0.78	2.14	0.12	1.02	0.69	108.5
403	程雷	男	寻常性银屑病	8	33	80	1.8	24.69	50	y	165	y	y	n	n	4.75	1.88	1.62	2.82	0.38	1.49	0.82	108.5
404	朱玉玮	男	寻常性银屑病	2.4	29	64	1.67	22.95	25	y	128	n	n	n	y	3.11	0.92	0.94	1.84	0.18	1.88	0.7	108.6
405	宋鑫	男	银屑病	3.6	28	95	1.72	32.11	0.1	n	132	y	n	n	n	3.98	1.17	1.13	2.44	0.23	1.27	0.78	108.7
406	齐绍明	男	寻常性银屑病	18	51	70	1.7	24.22	0.1	n	114	n	n	y	y	4.6	3.97	1.33	2.47	0.79	0.84	0.8	109.15
407	刘岩	男	寻常性银屑病	10.8	49	80	1.7	27.68	0.1	n	131	y	n	y	n	5	1.11	1.17	2.95	0.22	1	1.07	108.8
408	孔令国	男	寻常性银屑病	6	42	60	1.61	23.15	6	n	130	y	n	n	n	4.98	1.23	1.53	2.92	0.25	1.25	0.89	109
409	徐秀荣	女	银屑病	12	67	70	1.65	25.71	10	n	134	y	n	n	n	3.93	0.87	1.23	2.45	0.17	0.97	0.97	110.2
410	王利国	男	寻常性银屑病	6	40	64	1.65	23.51	0.5	n	135	y	y	y	y	5.19	4.23	0.96	3.45	0.85	1.18	1.37	109.5
411	刘强	男	寻常性银屑病	18	23	56	1.62	21.34	0.05	n	112	n	n	n	n	3.88	1.08	0.75	2.37	0.22	1.28	0.96	110.8
412	戚洪志	男	寻常性银屑病	10	41	70	1.65	25.71	0.03	n	110	n	n	n	n	4.54	1.18	1.37	2.66	0.24	1.22	0.9	111.05
413	刘志军	男	银屑病	5	37	66	1.63	24.84	40	n	124	n	n	n	n	5.12	3.47	1.42	2.86	0.69	1.04	0.88	110.3
414	潘忠萍	女	大斑块副银屑病	24	63	65	1.65	23.88	10	n	100	n	n	y	y	3.87	1.21	1.01	2.25	0.24	1.07	0.89	111.4
415	姜春生	男	银屑病	12	72	99	1.73	33.08	0.15	n	141	y	y	n	y	5.89	1.64	1.33	3.25	0.33	1.38	1.08	111.55
416	杜岩	男	寻常性银屑病	10	37	85	1.78	26.83	0.15	y	162	y	y	n	n	5.65	1.3	1.46	3.22	0.26	1.56	1.3	112
417	袁森唯	女	寻常性银屑病	45	16	51	1.6	19.92	0.8	y	163	y	y	n	n	6.47	1.55	1.54	3.67	0.31	2.1	1.47	112.43
418	王明远	男	寻常性银屑病	7.2	20	90	1.76	29.05	0.05	y	151	y	n	y	n	5.11	4.53	0.86	2.8	0.91	0.91	1.04	112.6
419	周海霞	女	红皮病性银屑病	42	46	73	1.7	25.26	0.5	n	109	n	n	n	n	3.31	1.68	0.79	1.84	0.34	0.96	0.82	112.97
420	郭清海	男	红皮病性银屑病	42	47	92	1.7	31.83	11	n	126	n	n	n	n	3.63	1.04	1.39	1.88	0.21	0.86	0.65	113.1
421	李淑英	女	掌跖脓疱性银屑病	42	57	46	1.65	16.9	30	y	162	y	n	n	n	3.14	2.07	0.76	1.77	0.41	1.6	0.66	113.2
422	战莉	女	寻常性银屑病	3.6	48	77	1.58	30.84	30	n	131	y	n	n	n	4.29	1.87	0.83	2.41	0.37	1.17	0.97	113.5
423	栾鹏	男	寻常性银屑病	18	52	70	1.69	24.51	0.1	n	127	n	n	n	n	6.02	1.17	1.62	3.47	0.23	1.22	1.23	113.7
424	吴浩	男	银屑病	45	17	102	1.8	31.48	0.05	n	132	y	n	n	n	4.72	1.71	1.12	2.66	0.34	1.36	0.87	113.8
425	尹丽波	女	红皮病性银屑病	36	44	75	1.56	30.82	0.05	n	132	y	n	n	n	6.74	3.1	1.25	3.84	0.62	1.22	1.47	113.7
426	张春香	女	银屑病	12	59	61	1.75	19.92	7	n	123	n	n	n	n	2.06	0.63	0.61	1.3	0.13	0.98	0.56	114
427	庄子玉	女	寻常性银屑病	42	21	57	1.6	22.27	15	n	137	y	n	n	n	4.76	1.17	1.2	2.64	0.23	0.96	0.91	114
428	沈辉龙	男	寻常性银屑病	12	26	72	1.75	23.51	20	n	128	n	n	n	n	3.85	1.45	1.01	2.12	0.29	0.95	0.89	114
429	黄雪梅	女	银屑病	7.2	48	70	1.62	26.67	0.02	n	98	n	n	n	n	4.98	1.38	1.38	2.69	0.28	1.58	0.89	114.4
430	刘绪恒	男	脓疱性银屑病	6	67	76	1.63	28.6	0.02	n	146	y	n	n	n	4.29	0.99	1.47	2.36	0.2	1.38	0.75	114.19
431	赵英奎	男	寻常性银屑病	15	83	75	1.63	28.23	0.3	n	113	n	n	n	n	6.45	0.69	1.73	3.48	0.14	1.1	1.1	114.4
432	常大鹏	男	寻常性银屑病	7.2	24	92	1.75	30.04	0.1	y	114	y	y	y	y	4.08	0.9	1.22	2.29	0.18	1.03	0.75	114.72
433	崔忠雪	女	寻常性银屑病	18	30	50	1.66	18.14	8	y	173	y	n	n	n	4.5	1.22	0.96	2.61	0.24	2.18	0.96	114.72
434	马山	男	脓疱性银屑病	14	34	55	1.59	21.76	0.05	n	113	n	n	n	n	4.37	1	1.03	2.96	0.2	1.07	0.79	114.87
435	石晶岩	女	寻常性银屑病	5	44	63	1.63	23.71	0.01	n	103	n	n	n	n	4.09	0.75	1.61	2.06	0.15	1.24	1	115.3
436	张晓艳	女	寻常性银屑病	12	42	62	1.63	23.34	9	n	114	n	n	n	n	1.37	0.49	0.63	0.8	0.1	1.31	0.77	115.4
437	杜凤林	男	寻常性银屑病	45	54	70	1.6	27.34	0.1	n	107	n	n	n	n	4.36	2.12	1.23	2.71	0.42	1.45	1.07	115.64
438	李培华	男	寻常性银屑病	3	35	71	1.68	25.16	12	n	111	n	n	n	n	4.61	1.06	1.4	2.78	0.21	1.35	0.91	115.65
439	焦姣	女	寻常性银屑病	4	27	55	1.58	22.03	7	n	145	y	y	y	n	3.59	0.95	1.21	2.03	0.19	1.18	0.45	115.94
440	宋丽	女	寻常性银屑病	12	56	82	1.75	26.78	20	n	135	y	y	n	n	6.23	1.94	1.59	3.49	0.39	1.34	1.45	116.04
441	单泽军	男	银屑病	12	52	56	1.65	20.57	0.5	n	120	n	n	y	y	4.5	1.41	1.11	2.57	0.28	1.15	0.92	116.6
442	苑桂芹	女	红皮病性银屑病	12	62	84	1.83	25.08	2	y	151	y	n	n	n	4.13	1.07	1.39	2.37	0.21	1.1	1	117.1
443	程革	女	脓疱性银屑病	10	50	48	1.6	18.75	2	y	163	y	n	n	n	4.13	1.42	0.81	2.39	0.28	1.03	0.89	116.9
444	贺佩全	男	寻常性银屑病	35	52	65	1.64	24.17	0.15	n	109	n	n	n	n	6.58	1.7	1.41	3.83	0.34	1.08	1.1	117.8
445	邵正凯	男	关节病型银屑病	4	39	81	1.6	31.64	20	y	122	n	n	n	n	2.99	1	0.8	1.73	0.2	1.56	0.8	118.3
446	姜文仁	男	寻常性银屑病	45	82	92	1.75	30.04	30	n	114	n	n	n	n	4.03	0.73	1.79	2.29	0.15	1.1	0.76	118.3
447	于秀坤	女	红皮病性银屑病	5	67	54	1.66	19.6	18	n	112	n	n	n	n	3.25	0.99	1.41	2.25	0.2	0.94	0.62	118.33
448	舒庆	男	脓疱性银屑病	10	53	78	1.72	26.37	8	y	139	y	y	n	n	4.09	1.37	1.14	2.27	0.27	1.27	0.93	118.6
449	祝士平	男	脓疱性银屑病	4	58	74	1.65	27.18	30	y	132	y	y	n	n	8.48	1.67	2.12	3.86	0.33	1.21	1.74	119
450	于淑凤	女	寻常性银屑病	12	38	53	1.62	20.2	0.1	n	121	n	n	y	y	4.45	1.11	1.04	2.67	0.22	0.8	1.06	120.1
451	刘发	男	寻常性银屑病	45	46	86	1.75	28.08	5	n	119	n	n	n	n	2.69	0.76	0.9	1.71	0.15	1.75	0.83	120.3
452	吕学芳	女	寻常性银屑病	35	74	60	1.68	21.26	0.1	n	89	n	n	n	n	4.46	2.19	1.02	2.84	0.44	1.01	1.06	120.77
453	肖朝勇	男	寻常性银屑病	40	26	70	1.56	28.76	0.05	y	169	y	n	n	n	8.6	1.5	0.88	3.7	0.4	1.12	1.6	120.9
454	邵正凯	男	关节病型银屑病	15	38	81	1.6	31.64	15	y	129	n	n	n	n	5.25	2.04	1.33	3.19	0.41	1.2	2.13	121
455	潘凤波	男	红皮病性银屑病	9	50	70	1.63	26.35	0.05	n	125	n	n	n	n	4.54	1.66	1.04	2.53	0.33	1.01	0.87	121.1
456	孟庆柱	男	寻常性银屑病	15	49	78	1.67	27.97	3	n	112	n	n	n	n	3.69	1.36	1.22	2.37	0.27	1.19	0.61	121.25
457	房丽娜	女	寻常性银屑病	8	21	61	1.6	23.83	2	n	123	n	n	n	n	3.21	1.4	0.66	1.86	0.28	1.07	0.99	121.53
458	张彦杰	男	寻常性银屑病	35	38	65	1.6	25.39	40	n	119	n	y	y	n	2.01	0.68	1.02	1.09	0.14	1.26	0.37	122.09
459	刘世艳	女	银屑病	45	56	61	1.6	23.83	0.04	n	121	n	n	n	n	3.81	0.77	1.65	2.1	0.15	1.48	0.76	122.8
460	王建忠	男	寻常性银屑病	25	57	105	1.76	33.9	20	n	129	n	n	n	n	5.56	1.68	1.63	3.47	0.34	1.26	1.27	122.9
461	王喜龙	男	寻常性银屑病	8	16	57	1.6	22.27	20	n	107	n	n	n	n	4.09	4.64	0.96	2.2	0.93	1.25	0.79	123
462	孙莹	女	寻常性银屑病	8	19	50	1.57	20.28	0.1	n	137	y	n	n	n	2.78	0.64	1.16	1.65	0.13	1.22	0.63	124.2
463	昌桂珠	女	寻常性银屑病	20	66	63	1.77	20.11	6	y	156	y	y	n	y	5.64	5.67	1.18	3.06	1.13	1.01	1.31	124.2
464	王洪彬	男	寻常性银屑病	12	72	52.5	1.68	18.6	0.12	n	113	n	n	n	n	4.14	0.95	1.65	2.3	0.19	1.21	0.59	124.2
465	吴丛涛	男	寻常性银屑病	25	48	79	1.66	28.67	30	n	135	y	n	n	n	4	2.13	1.17	2.27	0.43	1	0.7	124.2
466	高忠波	男	寻常性银屑病	12	36	87	1.85	25.42	20	y	152	y	n	n	n	4.97	1.91	1.13	3.35	0.38	1.66	1.06	124.5
467	李秀芳	女	寻常性银屑病	14	65	59	1.67	21.16	7	n	131	y	y	n	n	4.81	1.73	1.16	3.07	0.35	1.13	1.09	124.58
468	梁婉玉	女	寻常性银屑病	10	33	72	1.67	25.82	5	n	106	n	n	y	y	4.55	2.27	1.05	2.93	0.45	1.59	1.12	125.16
469	刘菊香	女	寻常性银屑病	14	66	55	1.58	22.03	6	y	159	y	y	n	n	5.86	3.12	1.38	3.6	0.62	0.87	1.22	125.75
470	李凤兰	女	全身脓疱性银屑病	12	51	73	1.6	28.52	0.05	n	109	n	n	n	n	4.21	2.54	0.97	2.4	0.51	1.46	0.83	126
471	刘玉鹏	男	寻常性银屑病	60	51	66	1.68	23.38	1	n	130	y	y	n	n	3.82	1.44	1.52	2.24	0.29	0.86	0.61	126
472	刘淑珍	女	寻常性银屑病	13	81	59	1.67	21.16	30	n	123	n	n	n	n	3.61	0.8	1.59	2.15	0.16	1.14	0.59	126.2
473	李华	女	寻常性银屑病	12	42	65	1.83	19.41	10	n	101	n	n	n	n	3.65	2.17	1.02	2.28	0.43	1.2	0.8	126.2
474	郝连艳	女	寻常性银屑病	18	43	62	1.64	23.05	10	y	145	y	y	n	n	3.7	0.9	0.7	2.2	0.2	1.33	0.4	126.3
475	厉忠亮	男	寻常性银屑病	10	66	53	1.63	19.95	0.5	y	118	y	y	n	n	6.91	1.92	1.45	4.46	0.38	1.15	1.67	126.3
476	李贵山	男	红皮病性银屑病	12	49	83	1.63	31.24	0.15	n	121	n	n	n	n	5.73	1.41	2.16	3.43	0.28	1.38	1.02	126.8
477	孟繁辉	男	寻常性银屑病	18	70	75	1.75	24.49	5	n	140	y	n	n	n	6.41	1.49	1.35	3.81	0.3	1.09	1.36	126.9
478	李桂英	女	寻常性银屑病	42	70	60	1.6	23.44	30	n	137	y	n	n	n	6.09	1.97	1.3	3.61	0.39	1.16	1.34	126.9
479	孙晓玲	女	寻常性银屑病	18	51	55	1.5	24.44	0.05	n	129	n	n	n	n	2.89	1.17	0.56	1.71	0.23	0.7	0.78	127.6
480	王丽荣	女	特指银屑病	24	58	65	1.65	23.88	30	y	154	y	y	n	n	7.18	2.21	1.58	4.05	0.44	1.62	1.47	128.2
481	马孟钢	男	寻常性银屑病	8	37	98	1.7	33.91	0.1	n	129	n	n	n	n	3.42	1.06	1.24	1.8	0.21	0.88	0.56	128.8
482	李亚娟	女	银屑病	12	47	75	1.64	27.89	17	n	135	y	n	n	n	5.28	1.44	1.11	3.13	0.29	0.76	1.11	129.52
483	姜志芳	女	红皮病性银屑病	36	62	67	1.57	27.18	1	n	139	y	y	n	n	3.64	1.19	1.13	2.35	0.24	0.91	0.82	129.7
484	邵阳	男	银屑病	6	16	46	1.6	17.97	0.5	n	124	n	y	n	n	2.14	0.45	1.05	1.19	0.09	1.37	0.37	130.3
485	毕婷婷	女	寻常性银屑病	45	28	73	1.65	26.81	40	y	154	y	n	n	n	3.24	1.35	1.06	1.87	0.27	1.29	0.69	131.2
486	刘淑珍	女	寻常性银屑病	15	52	67	1.67	24.02	0.02	n	119	n	n	n	n	3.11	0.47	1.3	1.78	0.09	1.72	0.53	131.9
487	孙明军	男	红皮病性银屑病	12	54	71	1.67	25.46	0.02	n	128	n	n	n	n	3.89	1.16	1.15	2.26	0.23	1.29	0.71	131.9
488	于广发	男	银屑病	48	77	72	1.8	22.22	0.1	n	126	n	n	n	n	4.02	1.33	1.05	2.35	0.27	1.29	0.97	132
489	孙利	女	特指银屑病	8	40	49	1.7	16.96	30	n	111	n	n	n	n	4.94	1.85	1.19	2.92	0.37	1.24	1	132.1
490	马岩	女	寻常性银屑病	12	29	58	1.78	18.31	0.02	n	123	n	n	n	n	5.11	1.19	1.32	3.06	0.24	0.94	1.14	132.1
491	杜锦海	男	红皮病性银屑病	8	69	68	1.75	22.2	0.1	n	101	n	y	n	n	2.58	0.69	1.25	1.36	0.14	1.22	0.35	132.41
492	刘欢	女	寻常性银屑病	45	30	44	1.65	16.16	0.04	n	105	n	n	n	n	3.66	0.68	1.3	2.1	0.14	1.29	0.65	132.7
493	丁童	女	寻常性银屑病	12	39	95	1.64	35.32	30	n	114	n	y	y	y	3.09	0.84	1.13	2	0.17	1.14	0.61	133.55
494	孟立新	女	寻常性银屑病	32	58	62	1.63	23.34	1	n	103	n	n	n	n	3.62	1.06	1.24	2.05	0.21	1.05	0.59	133.7
495	金鑫	男	寻常性银屑病	15	38	94.5	1.86	27.32	20	n	126	n	n	n	n	6.38	2.12	1.54	3.66	0.42	1.47	1.24	134.1
496	苏大桂	男	银屑病	8	85	56	1.6	21.88	28	y	131	y	y	n	n	3.9	1.41	1.02	2.32	0.28	1.14	0.94	134.3
497	周亚军	女	银屑病	15	74	60	1.67	21.51	15	n	133	y	n	n	n	5.09	4.47	1.13	2.83	0.89	1.13	1.09	134.3
498	赵玉田	男	寻常性银屑病	11	68	58	1.5	25.78	0.1	y	106	n	n	n	n	3.69	0.7	1.35	2.21	0.14	1.03	0.56	134.3
499	李树栋	男	寻常性银屑病	10	86	90	1.8	27.78	40	n	133	y	y	n	n	4.18	0.88	1.51	2.27	0.18	1.12	0.78	134.4
500	马淑华	女	寻常性银屑病	15	61	69	1.68	24.45	20	n	127	n	n	n	n	4.05	0.96	1.37	2.35	0.19	1.21	0.71	134.54
501	刘纪明	男	红皮病性银屑病	40	83	62	1.63	23.34	20	n	143	y	n	n	n	4.02	1.06	0.97	2.35	0.21	1.79	0.9	134.63
502	张磊	女	寻常性银屑病	12	36	60	1.68	21.26	3	y	125	n	y	n	n	4.35	2.86	1.09	2.77	0.57	1.3	1.03	136
503	谢金生	男	寻常性银屑病	10	59	70	1.61	27.01	12	n	146	y	n	n	y	3.79	0.9	1.14	2.28	0.18	1.86	0.86	134.7
504	满燕华	女	关节病型银屑病	10	65	60	1.64	22.31	0.05	n	114	n	n	n	n	3.98	0.9	1.34	2.33	0.18	1.34	0.81	136.2
505	张术军	男	银屑病	14	46	85	1.75	27.76	20	n	149	y	n	y	y	4.15	2.05	0.69	2.66	0.41	1.41	1.17	136.5
506	王桂霞	女	红皮病性银屑病	20	60	56	1.64	20.82	10	y	132	y	n	n	n	3.31	0.65	1.17	1.94	0.13	1.24	0.64	136.5
507	肖婷元	女	滴状银屑病	12	28	49	1.63	18.44	0.1	n	126	n	n	n	n	3.46	1.56	0.93	2.07	0.31	1.06	0.78	136.8
508	孟令文	女	脓疱性银屑病	10	19	60	1.6	23.44	30	n	132	y	n	n	n	3.43	0.64	1.46	1.95	0.13	1.29	0.69	137.3
509	刘治国	男	寻常性银屑病	12	68	60	1.65	22.04	0.03	n	100	n	n	n	n	4.19	0.62	1.8	2.28	0.12	1.41	0.63	137.6
510	孙洪华	女	红皮病性银屑病	20	41	60	1.58	24.03	0.02	n	91	n	n	n	n	2.72	0.67	0.92	1.63	0.13	1.24	0.75	137.8
511	王训波	男	寻常性银屑病	12	40	90	1.8	27.78	30	n	145	y	y	y	n	3.84	2.11	1.04	2.38	0.42	1.25	0.76	138.7
512	马国萍	女	红皮病性银屑病	10	44	70	1.63	26.35	20	y	162	y	n	n	n	4.06	1.01	1.44	2.36	0.2	1.06	0.82	139.3
513	纪海平	男	寻常性银屑病	20	54	65	1.58	26.04	7	n	120	n	n	n	n	4.4	7.33	0.88	2.09	1.47	1.04	0.8	140
514	鲁红莲	女	寻常性银屑病	25	54	66	1.72	22.31	30	n	104	n	n	n	n	5.06	2.2	1.23	3.03	0.44	1.14	1.06	140
515	马岩	女	寻常性银屑病	8	29	60	1.5	26.67	20	n	142	y	n	y	y	3.7	0.81	1.16	2.21	0.16	1.37	0.82	140.01
516	黄荫田	男	寻常性银屑病	14	80	80	1.76	25.83	0.05	n	99	n	n	n	n	2.94	0.78	0.95	1.72	0.16	0.95	0.58	140.81
517	韩军	男	红皮病性银屑病	14	53	90	1.77	28.73	4	n	123	n	n	n	n	5.61	3.81	1.54	3.53	0.76	0.98	1.26	140.6
518	林红	女	寻常性银屑病	8	49	83	1.6	32.42	0.05	n	143	y	n	n	n	3.72	1.99	0.63	2.26	0.4	1.37	0.96	140.9
519	赵洪波	男	寻常性银屑病	14	39	66	1.68	23.38	0.15	n	137	y	n	n	y	4.37	1.36	0.94	2.58	0.27	1.59	1	141.26
520	孙增辉	男	脓疱性银屑病	14	34	85	1.7	29.41	0.05	n	135	y	n	n	n	5.06	1.63	1.18	2.92	0.33	1.84	1.11	141.7
521	孙海娇	女	寻常性银屑病	13	32	64	1.66	23.23	8	n	109	n	n	y	n	3.32	0.69	1.19	2.03	0.14	0.8	0.82	141.8
522	刘桂荣	女	红皮病性银屑病	12	53	55	1.53	23.5	20	n	104	n	n	y	y	3.46	0.92	1.02	2	0.18	1.44	0.88	142.07
523	杨淑玲	女	寻常性银屑病	25	65	45	1.65	16.53	17	n	113	n	n	y	n	3.29	2.72	0.68	1.98	0.54	1.16	0.82	142.24
524	于福棋	男	寻常性银屑病	12	59	82	1.58	32.85	0.05	n	106	n	n	n	n	4.9	2.62	1.25	2.8	0.52	1.38	1.02	142.47
525	袁志龙	男	银屑病	12	34	81	1.68	28.7	0.1	n	150	y	y	n	n	5.07	3.51	1.4	2.75	0.7	0.87	0.99	142.8
526	任利双	女	寻常性银屑病	10	35	66	1.56	27.12	7	n	127	n	n	n	n	5.95	1.22	1.99	3.25	0.24	0.57	0.99	142.9
527	树鲁斯	男	脓疱性银屑病	17	72	85	1.72	28.73	22	n	134	y	y	y	n	3.69	1.42	1.12	2.07	0.28	1.2	0.46	143.9
528	魏天洁	女	银屑病	18	19	71	1.68	25.16	10	n	106	n	n	y	n	4.58	1.11	1.33	2.53	0.22	1.34	0.84	143.98
529	温冠杰	男	银屑病	8	22	90	1.78	28.41	12	n	95	n	n	n	n	2.32	1.06	0.57	1.32	0.21	2.46	0.69	144.4
530	马广松	男	银屑病	10	49	77	1.6	30.08	0.12	n	128	n	n	n	n	5.14	0.63	1.35	3.08	0.13	0.84	0.82	144.68
531	刘英杰	男	红皮病性银屑病	12	17	74	1.65	27.18	0.01	n	142	y	n	y	n	5.41	2.35	1.16	3.27	0.47	1.34	1.17	144.68
532	袁凤英	女	寻常性银屑病	12	56	75	1.65	27.55	5	y	149	y	n	n	n	3.09	0.85	0.92	1.86	0.17	1.28	0.87	145.16
533	王赵海	男	寻常性银屑病	8	30	101	1.7	34.95	20	n	129	n	n	y	n	4.07	1.17	1.48	2.38	0.23	1.05	0.65	145.2
534	宫秀迪	女	红皮病性银屑病	14	27	52	1.53	22.21	0.01	n	126	n	n	y	n	4.62	1.72	0.82	3.4	0.34	1.2	1.15	146.11
535	邓贵强	男	红皮病性银屑病	8	45	66	1.58	26.44	0.5	y	120	n	n	n	n	6.16	0.91	1.57	4.4	0.18	1.13	1.34	146.2
536	周小雨	女	银屑病	15	21	53	1.6	20.7	7	n	98	n	n	n	n	2.99	1.78	1.61	1.82	0.36	1.07	0.31	146.5
537	孟繁滨	男	红皮病性银屑病	14	63	73	1.7	25.26	0.02	n	110	n	n	n	n	4.09	1.16	1.49	2.18	0.23	1.33	0.62	146.3
538	王印亮	男	寻常性银屑病	7.2	26	72	1.7	24.91	20	n	96	n	n	n	n	2.84	0.8	0.85	2.02	0.16	1.27	1	146.8
539	陈志胜	男	银屑病	42	31	76	1.7	26.3	0.02	n	130	y	y	n	n	3.83	2.23	1.31	2.07	0.45	0.71	0.56	146.9
540	陈立娟	女	银屑病	4	35	60	1.75	19.59	20	n	143	y	n	n	n	3.01	0.91	0.78	1.84	0.18	1.34	0.75	146.9
541	张凯	男	银屑病	42	47	99	1.8	30.56	3	n	119	n	n	y	y	7.67	1.21	2.2	5.49	0.24	1.23	1.67	149.3
542	王占明	男	寻常性银屑病	18	67	93	1.82	28.08	10	n	125	n	n	n	n	3.11	0.6	1.07	2.12	0.12	1.38	0.7	149
543	李长江	男	银屑病	12	67	80	1.7	27.68	0.5	n	127	n	n	y	y	5.01	1.24	1.17	2.88	0.25	1.08	1.06	147.99
544	纪存	男	银屑病	6	54	86	1.76	27.76	30	y	186	y	n	n	n	4.67	0.94	1.54	3.39	0.19	1.55	1.03	150.2
545	孙淑珍	女	银屑病	5	75	69	1.7	23.88	50	n	119	n	n	n	n	6.82	1.6	1.24	3.97	0.32	1.83	1.53	150.4
546	马洪才	男	寻常性银屑病	12	63	73.5	1.75	24	8	y	165	y	n	y	y	8.37	2.62	1.45	4.73	0.52	0.83	1.82	150.8
547	陈金秋	男	寻常性银屑病	15	28	71	1.68	25.16	3	y	137	y	y	y	n	5.77	1.72	1.48	3.33	0.34	1.31	1.12	154.2
548	孙萍	女	寻常性银屑病	5.4	47	58	1.62	22.1	10	n	111	n	n	n	n	4.17	0.79	1.4	2.32	0.16	1.12	0.71	155.6
549	齐云海	男	寻常性银屑病	3.2	19	45	1.58	18.03	0.5	n	130	y	n	n	n	5.1	2.64	1.3	2.95	0.53	0.83	0.99	154.74
550	陈永财	男	全身脓疱性银屑病	8	33	79	1.75	25.8	4	n	108	n	n	n	n	2.45	0.99	0.92	1.62	0.2	1.65	0.45	155.64
551	遇明迪	女	银屑病	5	22	54	1.58	21.63	20	n	140	y	y	n	n	4.15	0.98	1.76	2.94	0.2	1.12	0.73	155.7
552	刘悦	女	寻常性银屑病	28	44	65	1.65	23.88	10	n	136	y	n	n	n	3.26	2.52	0.33	2.1	0.5	1.11	0.74	156.6
553	金鹏	男	寻常性银屑病	42	44	104	1.65	38.2	28	n	124	n	n	n	n	2.95	0.6	1.58	1.6	0.12	1.64	0.4	157
554	乔淑云	女	寻常性银屑病	15	67	60	1.6	23.44	0.1	n	106	n	n	n	n	3.9	0.88	1.15	2.8	0.18	0.81	0.79	157.2
555	靳钰博	女	寻常性银屑病	5	23	66	1.68	23.38	0.15	n	111	n	n	n	n	4.13	0.61	1.26	2.28	0.12	1.03	0.74	157.1
556	姜守义	男	红皮病性银屑病	14	62	85	1.72	28.73	0.5	n	150	y	n	n	y	5.6	1.91	1.31	4.32	0.38	1.3	1.31	157.9
557	狄冬梅	女	寻常性银屑病	10.8	48	61	1.8	18.83	0.6	y	172	y	y	n	n	4.48	1.8	1.31	3.24	0.36	1.24	1	157.9
558	李明	女	银屑病	10	34	69	1.6	26.95	30	n	114	n	n	n	n	3.41	1.2	0.8	2.07	0.24	1	0.79	158
559	张春艳	女	银屑病	10	54	65	1.78	20.52	20	n	103	n	n	n	n	3.39	0.83	1.36	1.91	0.17	0.96	0.55	158.6
560	李金珊	女	红皮病性银屑病	10.8	24	50	1.6	19.53	0.02	n	136	y	n	n	n	3.14	0.76	1.14	1.55	0.15	1.07	0.58	158.6
561	韩继伟	男	寻常性银屑病	45	32	58	1.68	20.55	7	n	120	n	n	n	n	3.4	1.16	1.25	1.98	0.23	0.77	0.63	159.1
562	于忠祥	男	脓疱性银屑病	3	64	79	1.72	26.7	0.1	n	120	n	n	n	y	3.27	0.5	1.11	1.85	0.1	1.48	0.57	159.6
563	王中科	男	红皮病性银屑病	2.4	51	85	1.75	27.76	8	n	96	n	n	n	n	3.95	0.56	1.89	2.53	0.11	0.92	0.59	159.82
564	王显辉	男	红皮病性银屑病	2.4	42	75	1.73	25.06	26	n	135	y	n	y	y	5.87	3.38	1.39	3.48	0.68	1.86	1.12	159.85
565	麻艳琴	女	寻常性银屑病	45	62	85	1.76	27.44	9	y	169	y	n	y	y	3.25	1.28	0.68	1.89	0.26	1.27	0.76	160
566	么祥臣	男	银屑病	12	57	60	1.6	23.44	10	n	114	n	n	n	n	4.19	1.84	1.14	2.41	0.37	2.06	0.83	161.5
567	杨继军	男	寻常性银屑病	12	64	71	1.67	25.46	2	y	165	y	n	n	n	4.91	2.83	1.16	3.73	0.57	1.09	1.17	160.7
568	申延海	男	寻常性银屑病	10	48	77	1.6	30.08	30	y	179	y	y	n	n	6.14	2.2	1.09	3.46	0.44	1.03	1.6	161.79
569	杨春霞	女	红皮病性银屑病	45	51	54	1.63	20.32	1	n	111	n	n	n	n	5.38	0.63	1.63	3.1	0.13	0.9	1.02	161.9
570	贾丹	男	银屑病	24	40	82	1.74	27.08	20	y	123	n	n	n	y	5.61	3.46	1.33	4.28	0.69	1.52	1.27	162.13
571	马淑媛	女	寻常性银屑病	12	61	68	1.6	26.56	27	n	135	y	n	n	n	2.71	1.26	0.83	1.96	0.25	0.82	0.68	162.13
572	王彦峰	男	寻常性银屑病	10	49	68	1.75	22.2	10	n	142	y	y	n	n	4.08	1.73	1.31	2.25	0.35	1.33	0.75	162.9
573	刘菲菲	女	寻常性银屑病	10	24	51	1.6	19.92	1.1	y	148	y	y	n	n	5.08	1.7	1.02	2.99	0.34	1.12	1.18	162.9
574	于家庆	男	脓疱性银屑病	8	82	68	1.78	21.46	10	n	136	y	n	y	y	4.8	3.36	1.13	2.7	0.67	1.31	0.99	163
575	郭兰英	女	特指银屑病	4.2	32	55	1.58	22.03	0.5	n	112	n	n	n	n	3.55	0.78	1.72	2.2	0.16	0.85	0.49	163.07
576	李舒野	女	寻常性银屑病	8	66	65	1.7	22.49	38	n	112	n	n	n	n	3.74	1.89	0.75	2.09	0.38	0.87	0.91	163.26
577	柳世杰	女	寻常性银屑病	42	50	55	1.58	22.03	0.1	n	115	n	n	n	n	5.19	1.13	1.49	2.98	0.23	0.93	0.9	163.3
578	穆荣霞	女	红皮病性银屑病	1.8	75	65	1.59	25.71	22	y	166	y	y	n	n	4.67	3.97	1.18	2.57	0.79	0.69	0.89	164.1
579	邱成波	男	银屑病	8	48	65	1.62	24.77	2	n	112	n	n	n	n	3.52	0.8	1.41	1.94	0.16	1.33	0.58	164.2
580	周升华	男	寻常性银屑病	45	40	86	1.61	33.18	9	y	151	y	n	n	n	5.02	1.67	1.16	3.81	0.33	1.18	1.16	164.2
581	李淑华	女	寻常性银屑病	45	67	64	1.68	22.68	0.1	n	134	y	n	y	y	6.38	2.16	1.61	3.53	0.43	1	1.14	164.2
582	孟立新	女	银屑病	10	61	64	1.72	21.63	15	n	116	n	n	n	n	3.28	1.04	1.05	1.84	0.21	1.18	0.61	164.4
583	李良庆	男	寻常性银屑病	12	48	56	1.62	21.34	6	n	143	y	n	n	n	6.21	1.41	1.86	3.43	0.28	1.24	1.08	164.5
584	杨秀荣	女	银屑病	8	61	62	1.69	21.71	20	y	139	y	y	n	n	3.28	0.86	0.98	1.94	0.17	0.95	0.74	164.68
585	马山	男	脓疱性银屑病	12	38	55	1.62	20.96	21	n	107	n	n	n	n	3.25	0.61	1.15	1.85	0.12	1.62	0.58	165.18
586	李长平	女	寻常性银屑病	15	50	55	1.6	21.48	8	n	92	n	n	n	n	1.5	0.63	0.74	0.9	0.13	0.95	0.3	165.3
587	周连玉	男	红皮病性银屑病	12	72	87	1.69	30.46	0.05	n	142	y	n	n	n	3.43	1.24	1.2	1.93	0.25	0.86	0.52	165.2
588	李响	男	寻常性银屑病	6	23	78	1.72	26.37	33	y	151	y	n	y	n	6.09	2.09	1.84	3.45	0.42	1.31	1.12	165.2
589	于晓刚	男	寻常性银屑病	16.2	34	90	1.82	27.17	12	n	145	y	n	n	n	2.89	0.86	1	1.57	0.17	1.71	0.52	165.84
590	刘希林	男	寻常性银屑病	10	58	65	1.68	23.03	10	n	115	n	y	y	n	4.96	1.86	0.73	2.97	0.37	0.99	1.25	165.9
591	张沈阳	男	寻常性银屑病	12	27	73	1.75	23.84	8	n	108	n	n	y	n	3.03	1.18	0.99	1.72	0.24	1.54	0.54	166.2
592	郭秀章	女	红皮病性银屑病	6	87	74	1.6	28.91	20	n	158	y	n	y	n	4.88	1.01	1.46	2.81	0.2	1.61	0.9	166.2
593	兰建中	男	红皮病性银屑病	8	46	74	1.7	25.61	0.12	n	150	y	y	n	n	3.62	0.79	1.27	2.04	0.16	1.1	0.55	166.29
594	李剑波	男	寻常性银屑病	45	45	86	1.7	29.76	1	y	159	y	n	n	n	4.52	1.17	1.38	2.52	0.23	1.37	0.84	166.66
595	高磊	男	寻常性银屑病	2.4	42	106	1.65	38.93	10	n	115	n	n	n	n	5.15	4.35	0.93	3.01	0.87	1.12	0.99	166.7
596	赵星霖	男	寻常性银屑病	12	20	106	1.72	35.83	10	n	121	n	n	n	n	4.01	1.19	1.38	2.28	0.24	1.43	0.69	167.23
597	李莉	女	银屑病	6	57	62	1.6	24.22	0.02	n	140	y	n	n	n	4.63	2.99	1.04	2.85	0.6	1.17	0.84	167.2
598	于微	男	银屑病	1.8	25	80	1.65	29.38	5	y	148	y	n	y	y	2.78	0.72	1.29	1.49	0.14	0.98	0.53	166.8
599	赵松涛	男	寻常性银屑病	45	36	89	1.65	32.69	0.15	n	116	n	n	n	n	4.67	1.48	1.22	2.91	0.3	0.92	0.78	167.56
600	韩清华	女	红皮病性银屑病	12	49	92	1.72	31.1	30	n	145	y	n	n	n	5.97	2.18	1.76	3.43	0.44	1.29	0.95	167.62
601	马国强	男	银屑病	6	47	89	1.85	26	0.5	n	132	y	n	n	n	4.62	6.02	0.87	2.53	1.2	1.12	0.88	168.1
602	马溯遥	女	寻常性银屑病	18	32	56	1.65	20.57	18	n	119	n	n	n	n	3.41	0.92	1.13	1.99	0.18	1.45	0.62	168.29
603	王德宝	男	银屑病	36	61	74	1.75	24.16	20	n	135	y	n	n	n	4.15	1.36	1.32	2.52	0.27	1.24	0.82	168.29
604	王凤兰	女	红皮病性银屑病	10	72	61	1.62	23.24	5	n	129	n	n	n	n	4.64	1.52	1.23	2.72	0.3	1.34	0.68	168.78
605	孟庆海	男	寻常性银屑病	18	61	75	1.86	21.68	40	n	135	y	n	n	n	4	1.39	1.16	2.43	0.28	1.1	0.75	169.5
606	谷俊峰	男	寻常性银屑病	3	44	75	1.62	28.58	10	y	163	y	n	n	n	6.2	2.4	1.53	3.76	0.48	0.99	1.36	169
607	杨凤环	女	银屑病	8	50	74	1.55	30.8	20	n	149	y	n	y	y	4.39	1.13	1.2	2.64	0.23	1.49	0.83	169.5
608	张博	女	脓疱性银屑病	10.8	28	45	1.63	16.94	n	y	162	y	n	n	n	5.67	0.84	1.62	3.46	0.17	1.07	1.07	169.68
609	孙金国	男	银屑病	12	66	51	1.68	18.07	0.02	n	111	n	n	n	n	3.96	1.05	1.64	2.27	0.21	1.26	0.71	169.97
610	范玉忠	男	银屑病	5	76	74	1.66	26.85	10	n	114	n	n	n	n	3.25	1.07	1.75	1.89	0.21	1.17	0.41	170.19
611	马维坤	男	寻常性银屑病	15	64	76	1.65	27.92	30	n	128	n	n	n	n	2.33	1.07	0.6	1.47	0.21	1	0.55	170.97
612	蒲展	男	寻常性银屑病	10	38	85	1.68	30.12	3	y	183	y	y	y	y	5.44	2.17	0.88	3.39	0.43	1.4	1.21	171.1
613	郭存宝	男	银屑病	18	24	65	1.58	26.04	20	n	127	n	n	n	n	4.34	2.34	1.17	2.49	0.47	0.85	0.77	171.5
614	姜帆	女	特指银屑病	15	35	66	1.68	23.38	0.02	n	129	n	n	y	n	4.86	0.84	1.3	3.1	0.17	0.98	1.04	171.3
615	孟宪告	男	寻常性银屑病	10	73	71	1.72	24	0.05	n	122	n	n	n	n	4.42	0.71	1.51	2.34	0.14	1.12	0.63	171.9
616	宋园园	女	银屑病	6	26	49	1.6	19.14	0.05	n	130	y	n	n	n	5.52	0.98	1.23	3.2	0.2	1.49	0.91	172.2
617	张春荣	女	银屑病	24	82	42	1.58	16.82	0.1	y	174	y	n	n	n	3.95	0.89	1.18	2.57	0.18	1.22	0.78	172.7
618	李柯庆	男	银屑病	8	35	87	1.8	26.85	7	n	104	n	n	n	n	3.89	0.71	1.36	2.52	0.14	1.37	0.66	172.7
619	蔡凤琴	女	寻常性银屑病	42	63	58	1.58	23.23	30	y	142	y	n	n	n	4.68	1.37	1.34	2.31	0.27	0.98	0.87	172.7
620	谢金鹏	男	寻常性银屑病	10	30	90	1.77	28.73	0.05	n	123	n	n	n	n	4.72	1.22	1.17	2.76	0.24	0.99	0.76	173.14
621	高凤英	女	寻常性银屑病	12	67	54	1.58	21.63	1	y	147	y	n	n	n	4.51	1.79	1.29	2.95	0.36	1.15	0.95	173.4
622	张万龙	男	寻常性银屑病	12	20	85	1.82	25.66	40	n	106	n	n	n	n	4.05	1.5	0.97	2.72	0.3	1.17	1.17	174.09
623	贲征洪	男	银屑病	6	54	80	1.78	25.25	2	n	103	n	n	n	n	3.24	1.58	1.05	2.09	0.32	1.61	0.41	174.5
624	袁奎彪	男	寻常性银屑病	6	40	60	1.72	20.28	0.15	n	122	n	n	n	n	4.47	0.94	1.21	2.99	0.19	1.2	0.86	174.53
625	刘庆义	男	红皮病性银屑病	24	75	61	1.55	25.39	2	n	98	n	n	n	n	2.98	0.74	1.43	1.58	0.15	1.01	0.49	174.9
626	相淑玲	女	脓疱性银屑病	12	56	68	1.55	28.3	18	y	127	n	n	n	n	2.73	0.97	0.93	1.81	0.19	1.02	0.59	174.8
627	刘洪涛	男	寻常性银屑病	6	49	102	1.79	31.83	20	n	125	n	n	n	n	3.06	0.9	0.87	2.14	0.18	0.79	0.71	175.13
628	张志强	男	银屑病	12	41	70	1.64	26.03	0.1	n	132	y	y	n	n	3.32	0.9	1.01	2.26	0.18	0.97	0.76	175.4
629	黄殿军	男	寻常性银屑病	6	63	70	1.75	22.86	6	y	157	y	n	n	n	6.25	4.55	1.19	4.35	0.91	1.25	1.41	176.56
630	王佳	男	红皮病性银屑病	6	37	80	1.71	27.36	8	n	129	n	n	y	y	4.32	2.25	0.84	3.03	0.45	1.21	1.02	177
631	王杨	女	银屑病	15	55	63.5	1.6	24.8	10	n	100	n	n	n	n	3.25	1.03	0.92	2.12	0.21	1.29	0.71	177.9
632	梁翠莲	女	寻常性银屑病	12	61	80	1.78	25.25	30	y	149	y	y	n	n	6.13	2.18	1.23	4.02	0.44	1.77	1.46	177.8
633	徐宝刚	男	寻常性银屑病	1.2	65	77.5	1.71	26.5	17	n	108	n	n	n	n	4.95	2.41	1.17	3.44	0.48	1.24	1.2	178
634	马可心	女	银屑病	42	17	45	1.68	15.94	5	y	123	n	n	n	n	6.55	2.34	1.34	4.61	0.47	1.4	1.52	178.2
635	姜洪伟	男	寻常性银屑病	1.2	51	85	1.75	27.76	30	n	140	y	n	n	n	3.72	0.91	1.05	2.58	0.18	1.4	0.74	178.3
636	姜慧	女	寻常性银屑病[L40.001]	18	49	58	1.6	22.66	0.05	n	91	n	n	n	n	4.18	0.74	1.54	2.77	0.15	1.21	0.73	178.48
637	米洪亮	男	红皮病性银屑病	42	59	83	1.7	28.72	0.12	n	123	n	n	n	n	3.98	0.89	1.14	2.73	0.18	1.23	0.81	178.6
638	任凯华	男	寻常性银屑病	12	34	75	1.65	27.55	0.1	n	98	n	n	n	n	3.66	0.88	1.19	2.39	0.18	1.16	0.82	178.7
639	杨继军	男	银屑病	42	64	65	1.75	21.22	3	n	130	y	n	n	n	4.67	1.28	1.27	3.29	0.26	1.13	0.93	179.6
640	孟立新	女	银屑病	4.8	61	65	1.58	26.04	7	n	120	n	n	n	n	3.7	1.94	0.97	2.64	0.39	1.19	0.7	180.19
641	孟超	男	寻常性银屑病	12	37	66	1.59	26.11	0.5	n	108	n	n	n	n	5.19	1.37	1.58	3.39	0.27	0.94	0.87	181.2
642	白晓明	男	寻常性银屑病	36	59	71	1.67	25.46	0.12	n	106	n	n	y	y	3.81	1.53	1.61	2.27	0.31	1.02	0.58	182
643	赵秀兰	女	寻常性银屑病	10	45	49	1.65	18	30	y	117	y	y	n	n	3.23	1.16	1.03	1.97	0.23	1.14	0.52	181.6
644	韩来忠	男	寻常性银屑病	10	49	70	1.7	24.22	17	n	133	y	n	n	n	5.15	0.83	1.49	3.48	0.17	1.23	1.06	182.79
645	穆荣霞	女	寻常性银屑病	6	75	61	1.6	23.83	10	n	112	y	y	n	y	3.55	1.04	0.99	2.16	0.21	1.02	0.68	183.53
646	孙春祥	男	红皮病性银屑病	24	70	65	1.69	22.76	0.1	n	113	n	n	n	n	4.15	1.09	1.01	2.92	0.22	0.95	0.99	186.65
647	翁艳波	女	寻常性银屑病	18	51	66	1.6	25.78	18	n	121	n	n	n	n	3.97	1.89	0.84	1.95	0.38	1.12	0.8	185.2
648	刘国鑫	男	寻常性银屑病	4.8	18	45	1.65	16.53	8	y	160	y	n	n	n	6.53	2.31	1.22	3.21	0.46	1.58	1.65	184.6
649	王树媛	女	寻常性银屑病	95	51	60	1.54	25.3	0.1	n	119	n	y	n	n	3.74	1	1.25	1.71	0.2	1.32	0.95	187.5
650	张艳梅	女	关节病型银屑病	6	46	57	1.65	20.94	5	n	122	n	y	n	n	3.16	0.73	0.75	1.51	0.15	0.69	1.03	189.11
651	衣学良	男	红皮病性银屑病	42	74	51	1.7	17.65	22	n	138	y	n	n	n	4.52	0.51	1.91	2.27	0.1	1.25	0.74	189.11
652	关玉萍	女	银屑病	24	64	54	1.6	21.09	20	n	121	n	n	n	n	4.16	0.73	1.72	2.68	0.15	1.17	0.67	189.6
653	吕学芳	女	寻常性银屑病	45	78	63	1.7	21.8	5	n	121	n	n	n	n	4.56	1	1.62	2.53	0.2	1	0.71	190.27
654	郑淑芳	女	银屑病	16.8	56	42.5	1.6	16.6	0.5	y	151	y	n	n	n	5.29	1.41	1.67	3.34	0.28	1.28	0.9	190.4
655	宋庆方	女	寻常性银屑病	3	54	75	1.65	27.55	15	y	118	y	n	n	y	5.64	2.5	1.48	3.73	0.5	1.12	1.02	190.9
656	魏庆贵	男	关节病型银屑病	1.8	70	78	1.6	30.47	30	n	94	n	n	y	n	2.82	1.48	0.63	1.89	0.3	1.16	0.74	191.3
657	富宝荣	女	寻常性银屑病	18	64	49	1.65	18	20	n	138	y	n	n	n	4.21	2.38	1.22	2.04	0.48	1.18	0.76	192.1
658	崔艳丽	女	银屑病	45	41	62	1.76	20.02	10	y	171	y	n	n	n	4.7	1.73	0.89	2.39	0.35	1.15	1.05	193.3
659	林世栋	男	关节病型银屑病	30	53	81	1.7	28.03	40	n	125	n	n	n	n	4.83	1.14	0.78	3.12	0.23	1.35	1.07	194.47
660	葛静波	女	红皮病性银屑病	12	53	75	1.58	30.04	0.5	n	116	n	n	n	n	3.62	0.93	1.43	2.29	0.19	0.91	0.47	194.6
661	郭福来	男	寻常性银屑病	15	16	51	1.73	17.04	26	n	142	y	y	n	n	3.95	1.64	0.98	2.64	0.33	2.11	1.02	194.7
662	郭鑫	男	脓疱性银屑病	10	40	104	1.85	30.39	18	n	135	y	n	n	n	4.48	0.99	0.88	2.82	0.2	0.82	0.79	194.98
663	程群	男	寻常性银屑病	12	37	87	1.76	28.09	0.8	n	95	n	n	n	n	2.93	0.78	0.77	2	0.16	0.79	0.72	195.41
664	张雷	男	寻常性银屑病	24	40	65	1.75	21.22	2	n	129	n	n	y	n	2.75	1.09	0.62	1.72	0.22	1.37	0.54	196.22
665	邹涛	男	红皮病性银屑病	18	43	84	1.69	29.41	6	n	141	y	n	n	n	4.98	1.56	1.06	3.6	0.31	1.05	0.98	197.6
666	陆文露	男	寻常性银屑病	15	32	90	1.7	31.14	0.5	n	121	n	n	y	n	3.98	0.94	1.02	2.07	0.19	1.14	0.76	198.26
667	肖淑云	女	脓疱性银屑病	1.2	66	64	1.58	25.64	12	n	130	y	y	n	n	3.62	0.99	0.97	1.88	0.2	1.04	0.68	198.9
668	郑欣	女	寻常性银屑病	30	56	68	1.8	20.99	0.02	n	113	n	n	n	n	4.76	1.5	0.95	3.52	0.3	1.23	0.86	200.1
669	陈晓亮	男	特指银屑病	42	39	75	1.73	25.06	20	y	133	y	n	n	n	2.87	1.09	0.79	1.83	0.22	1.14	0.54	200.3
670	王吉国	男	寻常性银屑病	42	47	75	1.7	25.95	30	n	129	n	n	n	n	3.73	1.21	0.97	2.74	0.24	1.12	0.69	200.5
671	李由	男	寻常性银屑病	20	25	67	1.58	26.84	1	n	125	n	n	n	n	4.11	1.04	1.5	2.87	0.21	1.91	0.61	200.9
672	刘笑飞	男	红皮病性银屑病	6	64	95	1.8	29.32	3	n	119	n	n	n	n	3.67	1.13	0.89	2.67	0.23	0.99	0.68	201.6
673	张晓霞	女	寻常性银屑病	12	47	65	1.62	24.77	5	n	138	y	n	n	n	4.37	1.68	1.01	3.06	0.34	0.81	0.93	201.6
674	底秋凤	女	寻常性银屑病	18	50	54	1.7	18.69	30	y	160	y	n	y	y	3.29	1.13	0.91	2.38	0.23	1.18	0.63	201.9
675	徐焕之	男	寻常性银屑病	15	16	49	1.67	17.57	30	n	111	n	n	n	n	2.54	0.8	0.68	1.61	0.16	0.69	0.61	202.6
676	王中秋	男	寻常性银屑病	12	36	65	1.58	26.04	1.5	n	112	n	n	n	n	4.58	0.73	1.37	2.74	0.15	0.96	0.6	202.3
677	于存海	男	银屑病	10	53	90	1.68	31.89	20	y	165	y	y	n	n	5.68	5.67	1.37	3.75	1.13	0.74	0.97	202.2
678	尚彦伟	女	寻常性银屑病	15	52	45	1.75	14.69	10	n	127	n	n	n	n	4.99	0.69	1.52	3.51	0.14	1.26	0.81	202.9
679	闫向荣	男	寻常性银屑病	15	86	80	1.65	29.38	0.05	n	124	n	n	n	n	4.27	1.41	1	3.09	0.28	0.97	0.81	203.7
680	马英	男	寻常性银屑病	12	36	80	1.7	27.68	10	n	91	n	n	n	n	3.83	0.76	1.66	2.61	0.15	0.95	0.74	203.79
681	马天强	男	寻常性银屑病	20	50	80	1.62	30.48	46	y	156	y	y	n	n	4.58	1.07	1.27	2.99	0.21	0.91	0.94	203.8
682	刘传金	男	寻常性银屑病	6	57	95	1.84	28.06	13	n	125	n	n	n	y	3.93	2.71	0.76	2.9	0.54	0.92	0.83	203.9
683	梁卫斌	男	红皮病性银屑病	6	63	76	1.58	30.44	2	n	118	n	n	y	y	4.17	1.51	0.96	2.99	0.3	0.89	0.84	204.5
684	韩雪	女	寻常性银屑病	2.4	38	75	1.68	26.57	1	n	108	n	n	n	n	6.78	2.13	1.2	4.86	0.43	1.1	1.29	204.7
685	李晶	女	寻常性银屑病	15	32	50	1.62	19.05	20	y	108	n	n	n	n	2.94	1.12	0.84	2.03	0.22	1.27	0.65	204.9
686	周玉芝	女	银屑病	8	58	70	1.75	22.86	20	n	125	n	n	n	n	4.16	1.06	1.28	2.97	0.21	1.18	0.91	204.7
687	谢朝君	男	寻常性银屑病	12	55	79	1.68	27.99	8	n	99	n	n	n	n	4.02	1.13	1.23	2.35	0.23	1.72	0.42	206.4
688	赵景富	男	寻常性银屑病	10	58	70	1.6	27.34	20	n	114	n	n	n	n	3.8	1.34	0.68	2.84	0.27	1.23	0.9	205.9
689	王永生	男	红皮病性银屑病	1.8	54	72	1.65	26.45	15	n	98	n	n	n	n	5.05	1.65	1.23	3.72	0.33	0.85	0.9	206.8
690	雷明亮	男	红皮病性银屑病	7	35	72	1.72	24.34	3	n	141	y	n	y	y	4.98	1.07	1.59	3.62	0.21	1.08	0.83	207.8
691	王树彬	男	寻常性银屑病	15	52	56	1.64	20.82	13	n	145	y	n	n	n	3.75	1	1.9	2.4	0.2	0.94	0.38	208.1
692	蔡凤丽	女	寻常性银屑病	10	56	63	1.58	25.24	8	n	108	n	n	n	n	2.82	0.85	0.78	2.06	0.17	1.16	0.48	208.22
693	刘春鹤	男	银屑病	2.4	26	62	1.72	20.96	20	n	110	n	n	y	y	3.14	1.08	0.85	2.01	0.22	0.79	0.63	208.21
694	陈龙才	男	寻常性银屑病	6	41	86	1.58	34.45	15	n	117	n	n	n	n	4.85	1.65	0.98	3.73	0.33	1.52	1.02	208.6
695	杨树文	男	寻常性银屑病	2.4	74	80	1.78	25.25	20	y	137	y	y	y	y	3.23	1.61	0.59	2.21	0.32	1.21	0.66	208.22
696	张宝华	女	寻常性银屑病	42	60	68	1.65	24.98	10	n	127	n	n	n	n	3.1	1.06	0.96	2.03	0.21	1.1	0.5	210.14
697	宋关双	男	寻常性银屑病	3.4	48	92	1.81	28.08	0.02	y	167	y	n	n	n	3.82	1.25	1.05	2.86	0.25	1.48	0.66	209.3
698	张亚凤	女	脓疱性银屑病	12	67	65	1.58	26.04	0.12	n	104	n	n	n	n	4.36	1.38	1.37	3.11	0.28	1.06	0.68	211.4
699	潘海龙	男	寻常性银屑病	10	21	52	1.66	18.87	0.02	n	134	y	n	n	n	3.19	1.92	0.78	2.12	0.38	1.13	0.6	211.15
700	国庆龙	男	红皮病性银屑病	45	47	70	1.66	25.4	0.1	y	156	y	n	n	n	3.97	2.66	1.19	2.2	0.53	1.36	0.65	211.5
701	宋丽敏	女	寻常性银屑病	24	49	69	1.56	28.35	4	n	118	n	n	n	n	5.95	1.92	0.99	2.34	0.25	0.62	0.96	214
702	李鹏	男	银屑病	18	33	100	1.7	34.6	10	n	120	n	n	n	n	3.56	3.54	0.64	2.39	0.71	0.91	0.74	213.8
703	宋景江	男	银屑病	10	61	65	1.73	21.72	3	n	138	y	y	n	n	3.9	2.1	0.72	2.51	0.31	0.98	0.87	213.1
704	崔志峰	男	寻常性银屑病	2.4	41	82	1.75	26.78	0.02	n	112	n	n	n	n	3.39	1.07	1.13	2.33	0.21	0.87	0.48	214.06
705	穆荣霞	女	银屑病	10	75	59	1.7	20.42	0.05	n	128	n	n	n	n	5.23	2.7	0.88	3.43	0.54	0.75	0.97	214.71
706	孙婷婷	女	银屑病	35	33	54	1.67	19.36	5	n	124	n	n	n	n	5.04	1.68	1.54	3.38	0.34	1.06	0.98	215.59
707	崔健	男	脓疱性银屑病	25	49	82	1.72	27.72	8	y	152	y	n	n	n	5.61	2.39	0.86	3.95	0.33	1.34	1.42	215.95
708	王佩红	女	银屑病	10	37	55	1.68	19.49	0.03	n	121	n	n	n	n	5.5	2.4	1.12	3.9	0.48	1.14	1.29	216.7
709	郭平	男	红皮病性银屑病	14	49	73	1.7	25.26	20	n	134	y	y	y	y	3.26	1.49	0.91	2.4	0.3	1.04	0.71	217
710	刘丹明	男	红皮病性银屑病	12	51	93.5	1.83	27.92	3	n	113	n	n	n	n	5.53	1.79	0.95	4.22	0.36	1.12	1.3	218.2
711	初万祥	男	银屑病	14	76	62	1.68	21.97	20	n	118	n	n	y	n	3.85	0.56	1.66	2.08	0.11	1.13	0.42	218.3
712	魏德芝	女	银屑病	14	66	52	1.7	17.99	0.8	n	123	n	n	n	n	4.56	4.17	1.43	3.08	0.23	0.97	0.78	219.7
713	于琛	女	脓疱性银屑病	10	34	63	1.55	26.22	5	n	158	y	y	y	y	2.99	1.31	0.56	1.94	0.26	1.19	0.66	219.3
714	杨继军	男	寻常性银屑病	10	64	62.5	1.72	21.13	0.6	n	128	y	n	n	n	4.06	1.07	0.94	2.73	0.21	1.06	0.82	221.4
715	李淑影	女	脓疱性银屑病	45	36	52.5	1.63	19.76	0.1	y	164	y	n	n	n	4.94	1.92	0.94	3.55	0.38	0.95	1	221.7
716	张金驰	男	寻常性银屑病	11	27	64	1.65	23.51	0.1	n	142	y	n	n	n	3.42	0.63	0.93	2.27	0.13	1.15	0.84	221.7
717	杨永泰	男	银屑病	30	18	90	1.75	29.39	10	n	98	n	n	n	n	2.76	0.56	0.92	1.9	0.11	1.28	0.39	223.3
718	孙宏阳	男	寻常性银屑病	25	29	75	1.73	25.06	6	n	137	y	n	n	n	3.28	0.7	1.01	2.23	0.14	0.97	0.55	221.79
719	赵洪波	男	银屑病	25	39	59	1.6	23.05	1	n	127	n	n	n	n	3.95	1.65	0.89	2.75	0.33	1.21	0.92	225.1
720	刘伟红	女	寻常性银屑病	23	45	64	1.62	24.39	7	n	117	n	n	y	y	3.3	0.76	0.9	2.21	0.15	1.16	0.71	225.3
721	林志军	男	寻常性银屑病	30	54	76	1.68	26.93	6	n	124	n	n	n	n	3.55	0.77	1.17	2.53	0.15	0.92	0.71	225.8
722	高兴利	男	银屑病性关节炎	8	51	66	1.7	22.84	0.1	n	140	y	n	n	n	3.85	0.81	1.39	2.64	0.16	1.04	0.66	225.9
723	张喜录	男	银屑病	10	66	74	1.62	28.2	15	y	177	y	n	n	n	3.55	3.03	0.78	2.43	0.61	1.27	0.89	226.1
724	石岩	女	银屑病	8	28	57	1.65	20.94	30	n	107	n	n	n	n	3.27	0.64	1.11	2.28	0.13	1.02	0.66	226.69
725	褚凤付	男	红皮病性银屑病	14	65	68	1.61	26.23	0.1	n	150	y	n	y	y	6.03	0.66	1.37	4.21	0.13	1.36	1.46	226.93
726	任洪晨	男	红皮病性银屑病	12	53	79	1.7	27.34	0.05	n	128	n	n	n	n	4.88	0.92	1.42	3.5	0.4	1.18	0.94	226.98
727	王华	女	全身脓疱性银屑病	20	69	60	1.92	16.28	1	n	142	y	n	n	n	4.54	1.58	1.06	3.16	0.32	1.05	1.09	228
728	张凤云	女	寻常性银屑病	25	80	70	1.72	23.66	30	y	126	n	n	n	n	3.87	1.12	1.03	2.75	0.22	0.7	0.86	228.7
729	钟启才	男	脓疱性银屑病	10	66	68	1.62	25.91	20	n	127	n	n	y	n	2.9	1.02	0.83	2.04	0.2	1.03	0.63	228.45
730	张喜录	男	银屑病	8	66	70	1.64	26.03	0.05	n	140	y	n	n	n	4.52	1.08	0.82	3.47	0.22	0.94	1.32	228.45
731	于洋	男	寻常性银屑病	12	60	70	1.58	28.04	0.1	n	150	y	y	y	y	4.94	0.93	1.07	3.68	0.19	1.25	1.23	228.7
732	朱峰		银屑病	40	46	75	1.78	23.67	5	y	159	y	n	n	n	5.91	2.27	1.31	4.27	0.45	0.84	1.2	229.82
733	李晓凤	男	寻常性银屑病	14	48	54	1.7	18.69	30	n	136	y	y	n	n	3.85	1.42	0.53	2.97	0.28	1.2	1.06	231.18
734	杨佰和	女	寻常性银屑病	12	60	62	1.7	21.45	0.5	n	119	n	n	n	y	3.42	0.66	0.96	2.49	0.13	1.27	0.72	231.9
735	丁富刚	男	银屑病	18	36	81	1.7	28.03	20	n	100	n	n	n	n	3.94	1.47	0.94	2.72	0.29	0.9	0.85	231.9
736	高兴利	男	关节病型银屑病	12	51	64	1.69	22.41	30	n	129	n	n	n	n	3.94	0.82	0.97	2.72	0.16	1.16	0.93	231.93
737	林洪赞	男	银屑病	10	42	94	1.76	30.35	30	n	112	n	n	n	n	4.8	2.27	1.01	3.49	0.45	2.01	0.99	232
738	王泽一	男	红皮病性银屑病	10	18	65	1.65	23.88	0.05	n	112	n	n	y	n	4.13	3.87	0.72	2.95	0.77	1.38	0.91	232.89
739	赵培臣	男	银屑病	10.8	57	72	1.67	25.82	6	n	124	n	n	n	n	3.13	0.57	0.92	1.98	0.11	1.63	0.61	232.9
740	张春彦	男	银屑病	10.8	54	63	1.58	25.24	0.05	n	122	n	n	n	n	3.26	1.1	1.05	2.29	0.22	1.1	0.62	233
741	张保存	女	银屑病	42	64	63	1.55	26.22	20	n	132	y	n	n	n	2.98	0.76	0.81	1.95	0.15	1.44	0.64	233
742	董中叶	女	寻常性银屑病	5	35	60	1.74	19.82	20	n	103	n	n	y	n	3.53	0.96	0.68	2.58	0.19	1.27	1.03	233.2
743	孙相明	男	红皮病性银屑病	2.4	72	68	1.76	21.95	1	n	150	y	n	n	n	4.76	1.25	1.43	3.39	0.25	1.28	0.83	235.49
744	刘琛	男	银屑病	42	33	107	1.83	31.95	0.1	n	130	y	n	n	n	4.67	1.27	1.15	3.19	0.25	1.32	0.91	238
745	王鹏	男	寻常性银屑病	21	28	78	1.65	28.65	40	y	155	y	n	y	n	4.52	0.99	1.06	3.4	0.2	1.53	0.95	238.9
746	任爽	女	银屑病	21	30	60	1.77	19.15	2	y	156	y	n	n	n	3.87	1.83	1.14	2.68	0.37	1.26	0.63	239.21
747	姜玉兰	女	银屑病	4	70	66	1.65	24.24	1	n	140	y	n	n	n	2.78	1.38	0.92	2.07	0.28	1.12	0.53	239.4
748	陈晓琳	女	脓疱性银屑病	10.8	24	102	1.7	35.29	0.3	n	120	n	n	n	n	3.19	0.68	1.15	2.18	0.14	0.76	0.58	241.6
749	艾玉祥	男	红皮病性银屑病	20	62	84	1.6	32.81	40	y	177	y	n	n	n	3.72	1.49	0.94	2.67	0.3	1.07	0.91	241.87
750	邢秀军	女	脓疱性银屑病	5.4	40	48	1.58	19.23	8	n	116	n	n	n	n	3.41	1.03	0.87	2.59	0.21	1.1	0.76	242.08
751	张晓倩	女	寻常性银屑病	6	33	56	1.62	21.34	20	y	126	y	n	y	y	2.74	1.49	0.71	2.11	0.3	1.81	0.71	242.08
752	刘跃起	男	寻常性银屑病	6	70	98	1.8	30.25	15	n	118	n	n	n	n	5.16	3.04	0.87	3.82	0.61	1.4	1.01	244.2
753	马滨成	男	寻常性银屑病	18	83	80	1.92	21.7	20	n	145	y	n	n	y	2.53	0.5	0.92	1.72	0.1	0.95	0.49	244.4
754	王翠翠	女	银屑病	4.5	36	79	1.64	29.37	1	n	114	n	n	n	n	3.52	1.23	1.05	2.22	0.25	1.39	0.75	244.52
755	尤晗	男	寻常性银屑病	42	26	90	1.78	28.41	10	n	119	n	n	n	n	4.78	1.2	1.14	3.64	0.24	1.22	0.94	248
756	周志	男	寻常性银屑病	8	56	65	1.67	23.31	15	y	180	y	n	n	n	6.44	2.28	1.08	5.33	0.46	1.49	1.75	245.3
757	蒋婷婷	女	银屑病	15	32	81	1.7	28.03	0.02	n	124	n	n	n	n	4.69	1.79	0.87	3.54	0.36	1.09	1.18	248.2
758	赫淑芹	女	银屑病	18	71	51	1.57	20.69	1	y	156	y	n	y	n	5.26	0.83	2.74	3.5	0.17	0.75	0.72	248.23
759	金莹	女	银屑病	18	49	78	1.8	24.07	1	y	188	y	n	n	n	4.07	0.75	0.97	3.08	0.15	1.23	0.73	250.5
760	高月	女	银屑病	4	27	62	1.62	23.62	8	n	150	y	y	n	n	4.39	1.32	0.85	3.09	0.26	1.45	0.93	251.41
761	陈井风	女	银屑病	15	62	65	1.68	23.03	12	n	130	y	n	n	n	4.2	1.17	1.01	3.21	0.23	1	0.8	251.9
762	何俊彬	男	银屑病	42	77	66	1.65	24.24	6	n	112	n	n	n	n	2.86	1.53	1	2.03	0.31	0.77	0.55	253.2
763	呼兴荣	女	红皮病性银屑病	4	38	45	1.6	17.58	40	n	144	y	n	n	n	4.55	3.14	1.06	3.3	0.63	1.02	0.78	253.97
764	张金英	女	银屑病	8	67	56	1.56	23.01	8	y	169	y	n	n	n	3.91	2.06	0.78	3.11	0.41	0.78	0.8	254.2
765	李新滨	男	红皮病性银屑病	24	61	61	1.7	21.11	10	n	100	n	n	y	y	3.48	0.99	1.29	2.42	0.2	1.21	0.52	254.98
766	李淑影	女	寻常性银屑病	6	48	63	1.78	19.88	15	y	187	y	n	y	n	3.1	0.52	0.99	2.19	0.1	0.96	0.57	257.1
767	祖志德	男	银屑病	6	47	84	1.74	27.74	20	n	124	n	n	n	n	3.81	0.72	1.17	2.76	0.14	1.18	0.61	257.21
768	毕楠楠	女	银屑病	4.8	28	52	1.62	19.81	2	n	124	n	n	y	n	4.14	1.51	0.91	3.15	0.3	0.84	0.79	257.35
769	姜文礼	男	寻常性银屑病	7	62	108	1.8	33.33	0.5	n	136	y	n	n	n	3.36	0.44	0.82	2.49	0.09	1.1	0.65	257.44
770	许向前	男	寻常性银屑病	8	37	86	1.7	29.76	0.02	n	112	n	n	n	n	2.95	0.45	1.12	1.78	0.09	1.26	0.44	257.54
771	孙志新	女	寻常性银屑病	5	51	50	1.68	17.72	0.05	y	177	y	n	y	n	3.94	1.88	0.89	2.95	0.38	1.14	0.7	258.5
772	岳俊义	男	银屑病	36	63	70	1.57	28.4	8	n	129	n	n	n	y	2.89	0.64	1.09	2.07	0.13	1.79	0.56	259.34
773	张晓霞	女	寻常性银屑病	42	47	65	1.62	24.77	0.1	n	137	y	n	n	n	3.1	1.29	0.93	2.09	0.26	1.06	0.49	262.95
774	曹明	男	寻常性银屑病	15	33	85	1.5	37.78	15	n	118	n	n	n	n	4.56	1.23	1.17	3.47	0.25	0.59	0.83	263.4
775	王秋敏	女	银屑病	1.2	42	57	1.56	23.42	20	n	131	y	n	n	n	3.61	1.18	1.23	2.54	0.24	0.97	0.63	264.1
776	孙成兰	女	脓疱性银屑病	14	71	60	1.75	19.59	10	n	144	y	n	n	n	3.17	1.14	0.73	2.34	0.23	1.36	0.61	266
777	李芳芝	女	红皮病性银屑病	5	79	55	1.66	19.96	10	n	106	n	n	n	n	4.34	1.19	1.12	3.27	0.24	1.83	0.76	266.18
778	李凤兰	女	脓疱性银屑病	4.8	51	65	1.6	25.39	6	y	121	y	y	n	n	2.82	0.97	0.87	2.1	0.19	1.1	0.61	266.3
779	王万胜	男	红皮病性银屑病	8	65	85	1.7	29.41	10	y	181	y	y	n	n	4.9	2.51	0.88	3.72	0.5	1.22	0.88	267.9
780	魏鑫	女	银屑病	3	33	49	1.56	20.13	10	n	126	n	n	y	n	4.24	1.19	1.18	2.74	0.24	1.12	0.75	269.4
781	佀春凤	女	银屑病	2.4	51	59	1.64	21.94	30	n	116	n	n	n	n	2.42	0.64	0.8	1.68	0.13	0.67	0.73	270.8
782	赵严松	男	银屑病	10	54	43	1.7	14.88	0.1	n	129	n	n	n	n	3.21	0.52	1.46	2.06	0.1	1.06	0.44	271.1
783	刘征洋	男	寻常性银屑病	12	29	84	1.8	25.93	30	n	114	n	n	n	n	3.66	1.13	1.1	2.33	0.23	1.05	0.71	271.4
784	朱田明	男	银屑病	42	31	71	1.58	28.44	30	n	115	n	n	y	y	2.1	0.68	0.91	1.43	0.14	1.41	0.63	271.61
785	密洪恩	男	红皮病性银屑病	2.4	75	80	1.6	31.25	0.1	n	113	n	y	n	n	4.55	1.92	0.91	3.35	0.38	1.4	1.21	273.6
786	潘凤波	男	脓疱性银屑病	4	53	75	1.8	23.15	10	n	132	y	n	n	n	3.63	2.01	0.81	2.78	0.4	1.17	0.73	273.7
787	徐野舰	男	寻常性银屑病	42	23	79	1.65	29.02	30	y	149	y	n	n	n	3.94	1.98	0.94	3	0.4	1.13	0.91	274.6
788	张凤芝	女	银屑病	8	80	60	1.6	23.44	5	n	141	y	n	y	y	2.94	1.04	0.52	2.23	0.21	1.15	0.6	274.88
789	李阳	男	银屑病	5	23	55	1.6	21.48	10	n	139	y	n	n	y	3.07	1.82	0.86	2.2	0.36	1.27	0.52	275.2
790	李静	女	寻常性银屑病	24	40	60	1.69	21.01	7	n	146	y	n	n	n	7.77	2.53	1.33	6.09	0.51	1.35	1.65	276.47
791	宋金柱	男	寻常性银屑病	24	62	53	1.67	19	2	n	104	n	n	n	n	3.14	0.98	0.86	2.36	0.2	1.11	0.76	276.78
792	高风	男	红皮病性银屑病	42	82	70	1.7	24.22	4	n	146	y	n	y	y	3.72	1.05	1.17	2.71	0.21	1.38	0.69	276.9
793	王桂香	女	关节病型银屑病	15	45	49	1.63	18.44	30	n	131	y	n	n	n	4.22	0.7	1.11	3.06	0.14	1.23	0.79	278.3
794	王永忠	男	银屑病	42	48	94	1.66	34.11	30	n	128	n	n	n	n	3.16	1.27	0.79	2.26	0.25	1.1	0.73	278.64
795	窦婧	女	寻常性银屑病	7.2	16	43	1.6	16.8	7	n	108	n	n	n	n	3.86	0.86	1.11	2.78	0.17	0.79	0.72	278.8
796	孙艾	女	银屑病	10	30	53	1.7	18.34	2	n	117	n	n	n	n	4.37	3.79	0.83	3.23	0.76	1.06	1	279.8
797	刘书杰	女	寻常性银屑病	7	57	64	1.58	25.64	0.5	n	103	n	n	n	n	3.76	2.34	0.86	2.73	0.47	1.15	0.68	279.9
798	李帅	女	银屑病	6	37	42.5	1.55	17.69	0.1	n	104	n	n	n	n	4.62	0.71	1.24	3.39	0.14	1.4	0.75	279.9
799	张鑫	女	银屑病	6	30	48	1.56	19.72	30	n	118	n	n	y	n	5.88	5.17	1.08	4.14	1.03	0.87	1.1	280.1
800	司马隶	男	银屑病	1.8	49	60	1.56	24.65	0.6	n	106	n	n	n	n	2.85	0.85	1.18	2.02	0.17	1.26	0.46	280.95
801	王敬祝	男	寻常性银屑病	10	68	87	1.6	33.98	0.5	n	83	n	n	n	n	3.15	0.55	1.13	2.28	0.11	1.4	0.52	282.5
802	李丹丹	女	脓疱性银屑病	4.8	31	55	1.58	22.03	20	n	120	n	n	n	n	3.88	1.05	0.81	2.9	0.21	1.47	1.11	283.1
803	张卫祥	男	银屑病	24	47	68	1.8	20.99	15	y	128	n	y	n	y	2.97	2.46	0.54	2.28	0.49	1.2	0.6	284.96
804	徐鹏达	男	寻常性银屑病	35	33	108	1.83	32.25	0.05	n	118	n	n	n	n	4.85	0.89	1.53	3.44	0.18	1.23	0.77	286.2
805	丁宝云	女	银屑病	6	58	58	1.62	22.1	0.02	n	112	n	n	n	n	4.3	2.27	1	3.14	0.45	0.97	0.71	287.6
806	焦长荣	女	关节病型银屑病	12	55	60	1.67	21.51	0.3	n	125	n	n	n	n	3.35	0.66	0.88	2.52	0.13	1	0.83	287.8
807	王景兰	女	寻常性银屑病	42	59	73	1.6	28.52	16	n	129	n	n	n	n	5.6	0.56	1.78	4	0.11	1.25	0.84	288.66
808	赵春英	女	银屑病	6	65	55	1.63	20.7	28	n	128	n	n	n	n	3.42	2.1	0.47	2.66	0.42	0.94	0.81	292.1
809	曲荣珍	女	寻常性银屑病	4.8	69	65	1.6	25.39	20	n	128	n	n	n	n	4.51	1.58	1.29	3.31	0.32	1.08	0.69	290.95
810	柳玉河	男	寻常性银屑病	12	57	76	1.7	26.3	15	y	198	y	n	n	n	4.19	1.43	0.86	3.18	0.29	1.05	0.8	292.53
811	李连山	男	寻常性银屑病	42	82	90	1.7	31.14	20	n	126	n	n	y	n	5.3	2.8	1.17	3.9	0.56	1.22	1.04	292.8
812	王海涛	男	银屑病	12	40	107	1.77	34.15	50	y	125	y	n	n	n	3.48	1.07	1.15	2.45	0.21	1.23	0.59	293.65
813	刘传金	男	寻常性银屑病	24	57	93	1.75	30.37	0.05	n	137	y	n	n	n	3.69	2.26	0.85	2.69	0.45	1.58	0.65	296.2
814	马滨成	男	银屑病	15	83	77	1.58	30.84	20	n	144	y	n	n	n	4.63	0.89	1.2	3.54	0.18	0.64	0.76	294.6
815	杨峰	男	滴状银屑病	30	36	73	1.75	23.84	0.15	n	142	y	n	n	n	5.02	4.11	1.07	3.43	0.82	1.21	0.77	297.5
816	程正涛	男	寻常性银屑病	5	41	69	1.6	26.95	15	y	176	y	n	n	y	6.1	2.93	1.17	4.52	0.59	0.95	0.96	298.18
817	陈宝琦	男	银屑病	18	82	91	1.72	30.76	2	n	135	y	n	n	n	2.99	1.91	0.83	2.21	0.38	1.07	0.56	298.5
818	宻红丽	女	红皮病性银屑病	16	56	52	1.6	20.31	0.02	n	131	y	n	n	n	4.11	1.46	1.11	2.92	0.29	1.06	0.66	299
819	赵立仁	男	寻常性银屑病	8	68	81	1.67	29.04	0.15	n	143	y	n	n	n	3.34	1.7	0.74	2.21	0.34	0.95	0.61	300.12
820	吕凯	男	寻常性银屑病	10	63	82	1.74	27.08	0.2	y	150	y	y	n	n	4.22	0.99	1.05	3.12	0.2	1.25	0.76	306.1
821	张学顺	男	银屑病	6	66	73	1.6	28.52	10	y	145	y	n	n	n	3.83	1.16	1.15	2.77	0.23	0.97	0.63	307.57
822	武波	女	寻常性银屑病	42	50	64	1.62	24.39	25	n	142	y	y	y	y	5.56	2.24	1.29	3.98	0.45	1.36	0.85	307.9
823	程邦	男	红皮病性银屑病	3.6	48	80	1.69	28.01	40	n	122	n	n	n	n	3.74	1.31	0.96	2.7	0.26	0.95	0.63	310.73
824	范桂芹	女	寻常性银屑病	8	77	65	1.69	22.76	12	n	106	n	n	n	n	4.98	0.64	1.63	3.3	0.13	1.23	0.76	311.9
825	王世莹	女	银屑病	16	68	63	1.58	25.24	6	n	129	n	n	n	n	3.21	1.32	0.91	2.29	0.26	0.95	0.53	312.7
826	刘丽莉	女	银屑病	3	37	53	1.58	21.23	2	n	130	y	n	n	n	3.64	1.15	1.02	2.59	0.23	1.11	0.6	314.04
827	徐广才	男	寻常性银屑病	36	66	87	1.76	28.09	30	y	140	y	n	n	n	4.52	1.36	1.07	3.29	0.27	0.85	0.81	315.7
828	王晓林	男	银屑病	10	53	93.5	1.6	36.52	10	n	110	n	n	n	n	3.17	1.26	1.05	2.09	0.25	0.85	0.55	316.1
829	范玉忠	男	寻常性银屑病	8	76	76	1.62	28.96	30	y	160	y	n	n	n	3.48	1.76	1.18	2.35	0.35	0.81	0.52	318.9
830	李良庆	男	寻常性银屑病	8	52	57	1.6	22.27	15	n	136	y	y	n	n	5.01	4.63	0.96	3.52	0.93	1.18	0.81	323.5
831	赵亚芹	女	红皮病性银屑病	6	70	68.5	1.58	27.44	0.5	y	154	y	n	y	n	5.61	1.84	1.14	4.09	0.37	1.19	0.98	328.56
832	郑伟	男	寻常性银屑病	36	48	87	1.63	32.74	20	n	112	n	n	n	n	2.9	0.53	1.12	2.1	0.11	1.4	0.53	329.13
833	李爽	女	银屑病	42	32	52	1.58	20.83	1	y	160	y	n	n	n	5.29	1.61	1.41	3.92	0.32	1.34	0.98	331
834	梁冰	女	寻常性银屑病	7.2	34	58	1.6	22.66	20	n	127	n	n	n	n	4.55	0.79	1.6	3.22	0.16	1	0.65	331.9
835	狄长友	男	银屑病	6	67	63	1.65	23.14	7	n	112	n	n	n	n	1.66	0.31	0.88	0.8	0.06	1.15	0.28	333
836	张驰	男	脓疱性银屑病	24	27	64	1.6	25	10	n	111	n	n	n	y	4	1.1	1.46	2.85	0.22	1.2	0.58	333.4
837	李玉忠	男	红皮病性银屑病	10	58	69	1.6	26.95	0.15	n	120	n	n	n	n	4.2	1.83	1.34	3.05	0.37	0.92	0.75	333
838	王翠翠	女	寻常性银屑病	10.8	36	75	1.65	27.55	8	n	133	y	n	n	n	2.97	0.93	0.89	1.78	0.19	0.88	0.54	333.43
839	宋巍	女	银屑病	42	32	71	1.72	24	20	y	149	y	y	n	n	4.39	2.1	0.71	3.33	0.42	0.89	1.11	334.5
840	陈永财	男	脓疱性银屑病	12	33	77	1.74	25.43	8	n	127	n	n	n	n	4.43	1.32	0.94	3.18	0.26	0.91	0.91	335
841	刘庆义	男	银屑病	12	75	65	1.65	23.88	14	y	167	y	n	n	n	3.84	0.75	1.16	2.5	0.15	1.05	0.7	336.9
842	崔万柱	男	红皮病性银屑病	12	86	60	1.65	22.04	20	n	137	y	n	n	n	4.1	0.85	1.49	2.83	0.17	0.93	0.82	336.9
843	周延明	男	红皮病性银屑病	10.8	49	52	1.6	20.31	20	n	131	y	n	n	n	4.97	1.58	1.12	3.52	0.32	1.4	0.95	336.9
844	白淑荣	女	寻常性银屑病	15	71	60	1.69	21.01	18	n	126	y	n	n	n	6.01	3.51	0.92	4.24	0.7	0.88	1.6	343.53
845	胡桂华	女	银屑病	13.5	62	72	1.68	25.51	50	n	141	y	n	n	n	3.37	0.91	0.99	2.52	0.18	1.39	0.71	341.5
846	崔健	男	脓疱性银屑病	12	49	82	1.76	26.47	20	n	132	y	n	n	n	3.92	0.95	1.43	2.83	0.19	1.42	0.71	343.3
847	徐忠杰	男	寻常性银屑病	12	70	84	1.71	28.73	2	y	170	y	n	n	n	4.38	1.6	1.01	3.3	0.32	1.22	0.92	344.71
848	曲馨楠	男	银屑病	6	42	61.5	1.6	24.02	12	y	170	y	n	n	n	5.58	1.12	1	4.09	0.22	1.26	1.32	346.27
849	李由	女	寻常性银屑病	6	40	70	1.67	25.1	50	y	167	y	n	n	n	4.97	1.58	0.86	3.52	0.32	1.16	1.07	347.18
850	郝运	女	关节病型银屑病	10	29	69	1.64	25.65	20	n	134	y	n	n	n	5.65	0.54	1.76	3.45	0.11	1.09	0.86	349.4
851	王宝生	男	寻常性银屑病	30	45	110	1.75	35.92	0.02	n	129	n	n	n	n	4.17	0.77	1.46	2.99	0.15	1.1	0.74	349.9
852	邵志强	男	寻常性银屑病	18	62	84.5	1.87	24.16	4	n	133	y	n	n	n	3.17	1.64	0.82	2.45	0.33	1.19	0.79	349.44
853	刘丽红	女	银屑病	18	28	70	1.7	24.22	20	y	147	y	n	n	n	4.68	1.94	1.32	3.45	0.39	1.05	0.87	350.6
854	赵国兴	男	银屑病	18	60	68	1.67	24.38	20	n	130	y	n	n	n	3.7	0.83	0.97	2.77	0.17	0.89	0.81	350.68
855	姜振广	那	银屑病	4	77	72	1.6	28.13	4	n	108	n	n	n	n	4.87	1.52	1.12	3.34	0.3	1.16	0.83	354.1
856	赵起超	女	银屑病	1.2	55	53	1.6	20.7	0.5	y	117	n	n	n	n	4.24	2.08	1.02	3.11	0.42	1.24	0.83	354.6
857	张森伟	男	寻常性银屑病	12	45	87	1.66	31.57	30	y	126	n	n	n	n	5.93	5.26	1.21	4.09	1.05	1.21	1.07	357.2
858	孟祥宏	男	寻常性银屑病	42	53	76	1.7	26.3	0.02	n	109	n	n	n	n	4.83	0.97	1.21	3.73	0.19	1.07	1.08	359
859	王占明	男	红皮病性银屑病	15	67	94	1.76	30.35	9	n	142	y	n	n	n	4.62	1.83	0.93	3.51	0.37	1.72	1.06	358.3
860	姜雪峰	男	寻常性银屑病	10.8	53	77	1.6	30.08	40	y	189	y	n	n	n	5.15	2.56	1.15	3.84	0.51	1.29	1.07	359.5
861	李洪波	女	寻常性银屑病	1.8	46	65	1.7	22.49	20	n	148	y	n	y	y	7.08	2.9	1.02	5.17	0.58	1.13	1.38	360.7
862	邓朝旭	男	寻常性银屑病	5	16	60	1.67	21.51	0.06	n	126	n	n	n	n	4.77	0.79	1.59	3.39	0.16	1.07	0.61	361.35
863	李春黑	男	红皮病性银屑病	15	58	55	1.71	18.81	10	y	122	y	y	n	n	4.52	1.6	0.99	3.59	0.32	1.54	0.98	361.5
864	李玉忠	男	脓疱性银屑病	1.8	58	67.5	1.66	24.5	0.05	n	132	y	n	n	n	5.83	2.25	1.25	4.73	0.45	1.02	1.52	362
865	皮利英	女	脓疱性银屑病	10	52	62	1.65	22.77	10	n	158	y	n	y	y	2.93	0.96	0.8	2.17	0.19	1.3	0.58	363.1
866	宋双利	男	寻常性银屑病	42	60	60.5	1.57	24.54	20	n	90	n	y	n	n	6.71	2.55	1.38	4.83	0.51	1.31	1.5	368.42
867	霍淑霞	女	寻常性银屑病	10	58	59	1.62	22.48	10	n	118	n	n	n	n	3.04	0.97	0.88	2.12	0.19	1.29	0.69	368.49
868	孙峰刚	男	银屑病	1.2	69	70	1.76	22.6	30	n	127	n	y	n	y	4.64	1.15	1.09	3.4	0.23	1.28	1.06	369.23
869	曹立伟	男	银屑病	6	27	73	1.59	28.88	20	y	151	y	n	n	n	3.36	5.42	0.69	2.26	1.08	0.94	0.6	369.8
870	衣学良	男	寻常性银屑病	10	74	52	1.54	21.93	0.01	n	129	n	n	n	n	4.4	1.94	1.04	3.11	0.39	1.02	0.92	375.1
871	刘洪涛	男	关节病型银屑病	6	48	96	1.68	34.01	1	y	185	y	y	y	y	3.71	1.87	0.9	2.81	0.37	1.25	0.74	371.44
872	郑雪飞	女	脓疱性银屑病	18	38	65	1.6	25.39	10	y	165	y	n	n	n	4.68	3.09	0.76	3.5	0.62	1.33	1.2	376.6
873	姜惠林	男	寻常性银屑病	48	80	87	1.66	31.57	0.1	n	115	n	n	y	y	5.14	1	1.82	3.37	0.2	1.1	0.78	378.47
874	白立华	女	银屑病	36	34	58	1.73	19.38	1	n	126	n	n	y	n	3.05	0.7	1.2	2.17	0.14	0.99	0.56	381.6
875	常愿	男	银屑病	18	32	90	1.68	31.89	11	n	132	y	n	n	n	4.84	1.92	1.13	3.51	0.38	1.06	0.91	378.91
876	梁艳斌	男	银屑病	6	46	69	1.67	24.74	5	n	103	n	n	n	n	3.84	1.14	1.22	2.68	0.23	1.17	0.76	381.82
877	杜夏男	男	寻常性银屑病	3.6	27	65	1.71	22.23	0.1	n	98	n	n	n	n	2.67	1.08	0.68	1.87	0.22	1.24	0.62	382.2
878	曲桂玲	女	银屑病	24	41	52	1.55	21.64	0.02	n	105	n	n	n	n	3.95	1.33	1.02	2.87	0.27	1.3	0.75	383.2
879	陈秀芹	女	银屑病	12	55	117.5	1.74	38.81	1	n	114	n	n	n	n	3.86	1.34	1.02	2.87	0.27	1.13	0.85	382.7
880	张向新	男	银屑病	10.8	52	89	1.72	30.08	3	n	113	n	n	y	y	4.28	1.51	0.95	3.2	0.3	1.01	0.94	383.12
881	张道军	男	红皮病性银屑病	10	55	64	1.61	24.69	30	y	153	y	n	n	n	4.48	1.13	1.33	2.89	0.23	1.49	0.77	383.5
882	潘福	男	银屑病	10	51	70	1.62	26.67	18	n	118	n	n	y	n	3.81	6.6	0.7	2.33	1.32	1.12	0.58	385.21
883	顾军	男	寻常性银屑病	10	67	74	1.82	22.34	0.1	n	131	y	n	y	n	4.17	1.2	1.28	3.11	0.24	1.38	0.86	386.3
884	朱国亮	男	寻常性银屑病	42	29	77	1.6	30.08	10	n	131	y	n	y	y	2.5	1.25	0.75	1.92	0.25	1.14	0.66	391
885	王佳奎	男	寻常性银屑病	12	39	70	1.68	24.8	20	y	165	y	n	n	y	5.08	2.16	1.13	3.47	0.43	1.19	1	388.5
886	马连义	男	寻常性银屑病	30	67	84	1.65	30.85	0.1	n	116	n	n	n	n	5.06	2.25	1.1	3.8	0.45	1.28	1.21	393.9
887	冯志刚	男	红皮病性银屑病	12	51	86	1.65	31.59	10	n	112	n	n	n	n	3.65	1.13	1.16	2.3	0.23	1.48	0.64	394.7
888	张玉林	男	银屑病	8	51	70	1.6	27.34	20	n	103	n	n	y	n	3.79	1.54	0.89	2.76	0.31	1.04	0.84	394.9
889	乔海芳	男	银屑病	6	65	80	1.76	25.83	10	n	131	y	n	y	y	5.27	1.72	0.9	3.85	0.34	1.07	1.42	396.93
890	刘和平	男	寻常性银屑病	42	68	68	1.64	25.28	0.5	n	145	y	n	y	y	5.72	2.61	1.31	3.76	0.52	1.25	1.28	397.3
891	潘涤尘	男	银屑病	18	82	66	1.69	23.11	20	n	86	n	n	n	n	4.17	1.09	1.22	2.96	0.22	1.11	0.84	400.37
892	裴蕾	女	脓疱性银屑病	12	38	54	1.66	19.6	0.01	y	188	y	n	n	y	5.54	2.43	1.06	4.3	0.49	0.82	1.34	397.7
893	施金玉	男	红皮病性银屑病	6	72	65	1.58	26.04	10	n	130	y	n	n	n	4.76	1.03	1.1	3.28	0.21	1.11	1.1	398.9
894	白永琴	女	银屑病	12	62	58	1.63	21.83	30	n	96	n	n	n	n	2.99	1.07	0.79	2.3	0.21	0.77	0.79	401.4
895	李春英	女	寻常性银屑病	24	55	70	1.66	25.4	50	y	160	y	n	n	n	4.3	1.55	0.9	3.21	0.31	1.02	1.07	403.24
896	姬传海	男	银屑病	12	49	80	1.67	28.69	20	y	174	y	n	y	n	4.72	1.29	1.22	3.07	0.26	0.94	0.94	403.6
897	吴军	男	寻常性银屑病	18	52	90	1.7	31.14	6	n	113	n	n	y	n	6.58	2.63	1.41	4.37	0.53	1.18	1.61	407.8
898	卢福基	男	银屑病	8	85	87	1.68	30.82	0.1	n	106	n	n	n	n	3.39	1.03	0.87	2.35	0.21	1.7	0.83	408.9
899	关洪宝	男	寻常性银屑病	5	50	64	1.65	23.51	16	n	117	n	n	n	y	6.92	3.16	1.28	4.77	0.63	0.95	1.72	409
900	孔祥春	男	银屑病	42	27	92	1.66	33.39	0.2	y	131	y	n	n	n	4.34	2.49	1.01	3.16	0.5	0.88	0.88	411.7
901	李玉忠	男	红皮病性银屑病	5	58	66	1.72	22.31	6	n	141	y	n	y	y	4.7	2.1	1.49	3.13	0.42	1.12	0.86	412.57
902	叶贤堂	男	寻常性银屑病	10	57	58	1.68	20.55	0.05	n	108	n	n	n	n	4.37	5.12	1.05	2.79	1.02	1.02	0.59	416.97
903	宋双利	男	银屑病	6	60	62	1.72	20.96	20	y	128	y	y	n	n	5.26	2.35	0.99	3.82	0.47	1.13	1.5	419.3
904	赵洪波	男	银屑病	7	39	67	1.6	26.17	2	n	111	n	n	y	y	4.46	1.19	1.17	3.12	0.24	1.55	0.93	420
905	徐翠翠	女	银屑病	12	43	58	1.5	25.78	20	y	151	y	y	n	y	5.88	1.69	1.27	4.04	0.34	1.22	1.46	425.3
906	高立良	男	脓疱性银屑病	8	58	70	1.74	23.12	5	n	124	n	n	n	n	4.13	0.99	1.1	3.16	0.2	0.91	0.99	427.2
907	赵冠南	男	银屑病	12	36	87	1.63	32.74	10	n	93	n	n	n	n	2.69	0.67	1.24	1.83	0.13	1.15	0.51	428.69
908	蔡凤丽	女	银屑病	12	56	62	1.6	24.22	20	n	105	n	n	n	n	3.28	0.93	0.92	2.35	0.19	1.06	0.73	429.51
909	丁童	女	银屑病	14	39	95	1.63	35.76	20	n	113	n	n	n	n	5.27	1.09	1.08	3.85	0.22	0.6	1.36	432.19
910	刘丽	女	银屑病	8	38	53	1.6	20.7	6	n	132	y	n	y	y	5	1.08	1.28	3.57	0.22	1.33	0.92	429.9
911	祖志德	男	银屑病	12	47	84	1.58	33.65	0.02	n	134	y	n	n	n	5.68	2.91	1.32	4.11	0.58	1.01	1.16	432.69
912	房芑州	男	寻常性银屑病	12	19	60	1.6	23.44	0.01	n	108	n	n	n	n	3.92	1.3	1.14	2.8	0.26	0.9	0.73	434.3
913	徐晓辉	男	寻常性银屑病	12	38	52	1.62	19.81	0.5	n	131	y	n	n	n	3.14	0.92	0.92	2.24	0.18	1.08	0.65	435.3
914	白丽苹	女	银屑病	10	41	60	1.6	23.44	0.1	n	113	n	n	n	n	4.68	1.5	1	3.5	0.3	1.13	1.06	435.43
915	李舒野	女	寻常性银屑病	10	66	64	1.65	23.51	20	n	96	n	n	n	n	3.66	0.66	1.26	2.65	0.13	1.01	0.71	443.9
916	海霞	女	红皮病性银屑病	14	37	63	1.7	21.8	0.02	n	125	n	n	n	n	3.89	1.68	0.91	2.91	0.34	1.12	0.82	447.1
917	朱喜波	男	红皮病性银屑病	35	46	53	1.6	20.7	20	y	185	y	y	n	n	6.63	8.97	1.23	4	1.79	1.28	0.98	453
918	王建国	男	寻常性银屑病	20	61	75	1.63	28.23	10	n	119	n	n	n	n	4.83	3.88	1.02	3.66	0.78	1.21	1.02	453.2
919	蔡凤琴	女	银屑病	12	63	59	1.6	23.05	20	n	114	n	n	n	n	2.88	0.64	0.72	2.2	0.13	1.46	0.72	454.1
920	王添奇	女	银屑病	22	35	59	1.6	23.05	0.05	n	120	n	n	y	y	4.68	1.73	1.02	3.53	0.35	0.98	1.15	454.8
921	姜惠林	男	寻常性银屑病	20	80	95	1.72	32.11	0.02	n	100	n	n	n	n	4.3	1.26	0.8	3.18	0.25	1.27	1.03	456.7
922	宋树	男	银屑病	12	50	82	1.55	34.13	40	n	123	n	n	n	n	5.16	2.22	0.99	3.86	0.44	1.51	1.32	454.14
923	赵俊永	男	银屑病	10	51	93	1.53	39.73	0.05	n	125	n	n	n	n	4.8	2.63	0.86	3.41	0.53	1.21	1.04	456.81
924	李元庆	男	红皮病性银屑病	25	35	65	1.6	25.39	11	n	134	y	n	n	n	5.26	1.46	1.28	3.88	0.29	1.01	1.14	460.88
925	马丽霞	女	银屑病	20	50	57	1.65	20.94	2	n	149	y	n	y	n	4.69	1.13	1.2	3.33	0.23	1.77	0.99	461
926	王伟	男	银屑病	18	42	100	1.78	31.56	23	n	127	n	n	n	n	4.78	1.75	0.84	3.52	0.35	1.07	1.19	468.6
927	国云亮	男	脓疱性银屑病	10	38	74	1.6	28.91	0.1	n	130	y	n	n	n	4.56	2.82	0.96	3.27	0.56	0.99	1.07	469.45
928	邱华中	男	寻常性银屑病	16	72	80	1.62	30.48	0.05	n	110	n	n	n	n	3.89	1.27	1.73	2.18	0.25	1.6	0.6	470.26
929	刘怀玉	男	脓疱性银屑病	45	61	69	1.65	25.34	10	y	176	y	n	n	n	4.14	1.21	1.19	3.02	0.24	1.24	0.77	470.8
930	王巍	女	寻常性银屑病	20	44	55	1.64	20.45	19	y	188	y	n	n	n	3.41	1.72	1.31	2.37	0.34	1.16	0.49	474.4
931	韩志伟	男	脓疱性银屑病	12	40	60	1.62	22.86	20	n	93	n	n	n	n	6.01	1.44	1.78	4.3	0.29	0.99	1.42	475.1
932	张晓倩	女	寻常性银屑病	14	33	54	1.6	21.09	4	n	104	n	n	n	n	4.52	0.62	1.41	3.11	0.12	1.16	0.78	475.1
933	孙侠	女	脓疱性银屑病	30	71	51	1.59	20.17	10	n	100	n	n	n	n	3.92	0.82	1.49	2.7	0.16	0.97	0.7	477.1
934	陈晓琳	女	寻常性银屑病	15	24	105	1.75	34.29	1	y	116	n	n	n	n	4.18	0.87	1.13	3.07	0.17	0.98	0.92	476.81
935	王逸波	男	寻常性银屑病	18	36	70	1.58	28.04	8	n	131	y	n	n	n	3.71	1.19	0.97	2.69	0.24	1.04	0.76	477.5
936	满天宇	男	脓疱性银屑病	22	31	66	1.56	27.12	0.02	n	129	n	n	n	n	4.31	1.07	1.24	2.99	0.21	1.14	0.89	481.5
937	宝力道	男	寻常性银屑病	40	41	105	1.6	41.02	20	n	127	n	n	y	y	3.86	0.77	1.15	2.9	0.15	1.16	0.77	481.9
938	杨国臣	男	银屑病	12	66	74	1.62	28.2	3	n	130	y	n	n	n	2.66	1.03	0.74	1.86	0.21	1.01	0.65	486.1
939	范海彬	男	脓疱性银屑病	45	42	105	1.75	34.29	0.1	n	130	y	n	n	y	5.36	2.52	0.97	3.86	0.5	1.15	1.36	487.5
940	王丽春	女	寻常性银屑病	14	53	78	1.68	27.64	8	n	135	y	n	y	y	4.72	1.13	1.12	3.4	0.23	1.63	0.94	488.9
941	周瑞华	男	银屑病	8	84	74	1.6	28.91	14	n	120	n	n	n	n	3.77	0.84	1.01	2.7	0.17	1.13	0.93	489.8
942	郭丽娜	女	脓疱性银屑病	22	39	60	1.75	19.59	18	n	112	n	n	n	n	3.62	2.6	0.93	2.84	0.52	0.84	0.75	491.22
943	祖志德	男	银屑病	20	47	82	1.67	29.4	3	y	159	y	n	y	y	4.59	2.43	1.06	3.06	0.49	1.14	1.05	490.2
944	杜淑娟	女	红皮病性银屑病	14	67	61	1.58	24.44	0.1	n	124	n	n	n	n	2.93	1.41	1.03	2.17	0.28	1.38	0.59	490.6
945	李文涛	男	银屑病	12	84	68	1.64	25.28	0.5	n	120	n	n	y	n	4.09	2.26	0.84	3.17	0.45	0.96	0.89	490.7
946	耿洪峰	男	关节病型银屑病	20	48	90	1.63	33.87	20	y	126	n	n	n	n	3.85	1.06	1.03	2.77	0.21	1.49	0.86	493.5
947	王琦	男	银屑病	12	38	80	1.5	35.56	30	y	161	y	n	n	n	3.25	0.84	1	2.41	0.17	1.63	0.63	496.21
948	于京水	男	银屑病	20	74	66	1.68	23.38	30	y	126	n	n	y	n	2.98	1.25	0.79	2.23	0.25	0.93	0.62	501.4
949	韩春喜	男	脓疱性银屑病	20	65	64	1.57	25.96	0.1	n	120	n	n	n	n	3.54	1.12	0.93	2.63	0.22	1.32	0.71	502.2
950	付春和	男	银屑病	12	67	95	1.7	32.87	40	y	122	y	n	y	n	4.02	0.82	1.04	3.08	0.16	1.05	0.88	502.2
951	曹淑英	女	银屑病	12	49	46	1.66	16.69	6	n	128	n	n	n	n	4.55	1.29	1.16	3.4	0.26	1.17	0.96	508.9
952	赵勇	男	银屑病	14	44	71	1.64	26.4	30	n	135	y	n	n	n	5.22	1.69	1.16	3.54	0.34	0.93	1.16	512.03
953	王琦	男	银屑病	23	38	81	1.82	24.45	30	n	126	n	n	n	n	4.06	1.26	0.99	2.66	0.25	1.1	0.83	513.9
954	王慧莹	女	银屑病	12	22	51	1.67	18.29	11	n	120	n	n	n	n	5.9	2.35	1.21	4.1	0.47	1.17	1.34	520.6
955	禇金磊	男	寻常性银屑病	30	25	66	1.58	26.44	0.2	n	111	n	n	n	n	4.06	1.38	0.92	2.82	0.28	1.27	0.77	521.3
956	李淑佰	男	银屑病	10	59	52	1.58	20.83	0.05	n	105	n	n	n	n	3.9	2.12	1.29	2.64	0.42	1.15	0.69	523.53
957	赵丽萍	女	寻常性银屑病	12	45	64	1.7	22.15	0.15	n	120	n	n	n	n	5.34	1.22	1.4	3.51	0.24	1.72	0.96	523.8
958	马晓晨	男	银屑病	18	25	71	1.68	25.16	20	n	130	y	n	y	y	2.74	1.03	0.88	1.93	0.21	1.11	0.73	524.6
959	王中秋	男	银屑病	6	36	61.5	1.6	24.02	20	n	123	n	n	n	n	4.46	1.66	1.01	3.17	0.33	1.06	1.43	543.2
960	孙侠	女	脓疱性银屑病	12	71	44	1.65	16.16	0.15	n	136	y	n	n	n	4.78	1.43	1.19	3.3	0.29	0.98	1.19	546.13
961	孙安华	女	银屑病	12	59	66	1.66	23.95	8	n	112	n	n	y	n	3.98	0.71	1.11	2.73	0.14	1.04	1.05	551.12
962	兰长和	男	银屑病	15	54	53.5	1.56	21.98	0.1	n	116	n	n	n	n	4.17	0.84	1.3	2.7	0.17	0.72	1.15	553.54
963	王起军	男	寻常性银屑病	28	47	86	1.76	27.76	30	n	109	n	n	n	n	4.89	0.77	1.99	2.75	0.15	1.06	0.79	557.42
964	何俊义	女	银屑病	12	69	69	1.7	23.88	20	n	145	y	n	n	n	3.67	0.69	1.14	2.39	0.14	1	1.28	559.9
965	徐亚洲	男	脓疱性银屑病	28	62	62.5	1.63	23.52	5	n	145	y	n	n	n	4.15	2.04	0.7	3.04	0.41	1.01	1.36	560.3
966	何万春	男	寻常性银屑病	15	89	70	1.7	24.22	0.5	n	120	n	n	n	n	4.16	1.3	0.96	2.94	0.26	1.16	0.96	560.6
967	王逸波	男	寻常性银屑病	12	36	71	1.7	24.57	3	n	115	n	n	n	n	2.62	0.63	0.83	1.66	0.13	1.21	0.83	571
968	刘宝林	男	红皮病性银屑病	3	59	100	1.67	35.86	20	n	146	y	n	n	n	5.33	2.11	1.3	3.61	0.42	1.1	1.36	573.87
969	刘玉华	女	寻常性银屑病	45	62	64	1.62	24.39	25	n	116	n	n	n	y	4.69	1.58	1.31	3.06	0.32	1.06	0.91	581
970	肖华	男	寻常性银屑病	24	72	78	1.6	30.47	0.05	n	138	y	n	y	y	3.82	1.8	1.23	2.23	0.36	0.9	0.94	577.9
971	田景财	男	红皮病性银屑病	12	54	67	1.7	23.18	0.1	n	138	y	n	n	n	3.54	1.13	1.04	2.27	0.23	1.14	1.08	599.81
972	李殿平	男	银屑病	2.7	59	70	1.62	26.67	10	y	144	y	n	n	n	5.24	1.46	1.1	3.85	0.29	0.91	1.77	601.99
973	李文丽	女	银屑病	15	26	50	1.62	19.05	20	n	105	n	n	n	n	4.18	1.42	0.9	3	0.28	0.7	1.3	602.07
974	朱匡正	男	银屑病	15	75	71	1.7	24.57	3	n	143	y	n	n	n	4.2	1.24	0.91	3.04	0.25	1.14	0.9	602.23
975	崔芝滨	男	银屑病	48	63	92	1.67	32.99	1	n	115	n	n	n	n	3.27	0.75	1.34	1.78	0.15	0.84	0.64	603
976	张飞	女	银屑病	6	27	49.5	1.5	22	20	y	174	y	n	y	y	4.96	3.03	0.97	3.38	0.61	0.71	1.39	605.6
977	姜志治	男	银屑病	3	65	82	1.69	28.71	30	n	133	y	y	y	y	2.63	3.51	0.74	1.19	0.7	0.92	0.6	610.7
978	李新滨	男	银屑病	21.6	61	62	1.63	23.34	1	n	120	n	n	n	n	5.57	1.18	1.78	3.55	0.24	1.15	1.14	611.4
979	马振娟	女	脓疱性银屑病	48	51	58	1.63	21.83	18	n	109	n	n	n	n	5.53	1.53	0.95	4.27	0.31	1.06	1.33	620.3
980	邹英杰	男	红皮病性银屑病	36	48	60	1.6	23.44	0.1	n	133	y	n	n	n	3.44	1.87	0.77	2.3	0.37	1.37	1.3	612.61
981	柳羲	男	寻常性银屑病	5.4	31	84	1.6	32.81	10	y	117	y	n	n	n	3.45	0.88	0.98	2.29	0.18	1.09	0.81	613.63
982	林楠	男	脓疱性银屑病	3	38	80	1.7	27.68	10	n	158	y	n	y	y	2.97	0.82	0.91	1.9	0.16	1.2	0.9	612
983	才耀彬	男	脓疱性银屑病	18	42	64	1.66	23.23	10	n	110	n	n	n	y	4.47	0.95	1.72	2.56	0.19	1.32	1.08	624.58
984	周翠香	女	银屑病	45	65	66	1.6	25.78	18	n	128	n	n	n	n	4.08	1.18	1.03	2.81	0.24	0.85	1.4	626.2
985	姜雪峰	男	银屑病	21	53	76	1.79	23.72	3	n	110	n	n	n	n	4.24	0.65	1.27	2.84	0.13	1.26	0.79	626.4
986	李龙飞	男	银屑病	32	26	47	1.56	19.31	10	y	156	y	y	n	n	4.35	1.49	1.06	2.82	0.3	1.49	1.12	628.4
987	宋双利	男	银屑病	32	60	60	1.6	23.44	30	y	148	y	n	n	n	5.08	1.94	1.75	2.94	0.39	1.07	0.99	632.8
988	朴明道	男	红皮病性银屑病	48	72	69	1.56	28.35	0.1	n	135	y	n	n	n	3.43	0.52	0.36	1.97	0.1	1	0.79	634.5
989	程喜林	男	红皮病性银屑病	24	59	62	1.69	21.71	0.1	n	111	n	n	n	y	4.43	2.44	1.47	2.47	0.49	0.94	0.71	640.4
990	丁志成	男	银屑病	18	27	73	1.74	24.11	30	n	123	n	n	n	n	5.51	2.34	1.27	3.77	0.47	1.29	1.38	638.5
991	李萍	女	银屑病	6	40	50	1.6	19.53	1	n	121	n	n	n	n	4.07	1.09	1.19	2.66	0.22	1.96	0.95	638.67
992	焦雪娇	女	寻常性银屑病	3	31	52	1.53	22.21	6	y	226	y	n	n	n	4.31	1.53	0.98	3.02	0.31	0.65	1.34	634.88
993	马彤彤	女	寻常性银屑病	3	31	49	1.63	18.44	30	n	173	y	n	n	n	5.19	1.12	1.23	3.74	0.22	1	1.24	647
994	陈立新	男	寻常性银屑病	32	57	60	1.62	22.86	30	y	152	y	n	y	n	2.94	0.75	0.7	2.09	0.15	1.71	0.93	648.03
995	韩春喜	男	脓疱性银屑病	48	65	69	1.55	28.72	0.5	n	112	n	n	n	n	4.9	1.9	1.41	3.11	0.38	0.89	1.02	649.93
996	籍东辉	男	银屑病	6	40	65	1.6	25.39	2	n	112	n	n	y	y	4.22	1.34	0.95	3	0.27	1.17	1.1	652.68
997	牛立军	男	红皮病性银屑病	12	49	55	1.62	20.96	6	n	104	n	n	n	n	3.15	0.9	0.73	2.24	0.18	0.83	0.79	657
998	吴玉兰	女	寻常性银屑病	12	61	75	1.72	25.35	20	n	124	n	n	y	y	4.1	2.12	0.97	2.71	0.42	0.72	1	658.57
999	袁炳正	男	寻常性银屑病	18	70	79	1.83	23.59	10	n	118	n	n	n	n	3.9	0.96	1.37	2.34	0.19	1.07	0.77	658.6
1000	倪永志	男	寻常性银屑病	18	34	64	1.7	22.15	28	n	120	n	n	n	n	4.59	2.2	1.08	3.07	0.44	1.06	1.2	663.7
1001	马菲	男	寻常性银屑病	16	55	98	1.65	36	15	n	131	y	y	n	n	4.68	1.14	1.31	3.14	0.23	1.19	0.91	665.55
1002	宁占武	男	银屑病	23.1	61	74	1.63	27.85	0.05	n	133	y	n	y	y	4.55	0.98	1.43	2.92	0.2	0.95	0.77	677.7
1003	肖文彦	男	银屑病	48	51	67	1.7	23.18	30	y	130	y	y	n	y	4.55	3.76	1	2.8	0.75	1.13	1.21	678.52
1004	闫琦	男	银屑病	4	57	87	1.62	33.15	10	n	126	n	n	y	y	5.06	1.86	1.17	3.52	0.37	1.09	1.12	690.2
1005	黄刚	男	银屑病	24	40	65	1.82	19.62	0.5	n	123	n	n	n	n	5.32	1.52	1.17	3.85	0.3	0.87	1.15	696.8
1006	吴春玲	女	脓疱性银屑病	10.8	33	50	1.8	15.43	10	n	135	y	n	n	n	4.84	1.74	1.27	3.22	0.35	0.96	0.95	698.4
1007	张玉福	男	银屑病	6	56	45	1.6	17.58	0.02	n	136	y	n	n	y	3.44	0.62	1.43	1.89	0.12	0.82	0.49	698.1
1008	关金红	女	寻常性银屑病	8	53	71	1.68	25.16	7	n	86	n	n	n	n	3.1	0.74	0.97	1.98	0.15	1.27	0.71	703.4
1009	张晓霞	女	寻常性银屑病	12	47	61	1.64	22.68	20	n	120	n	n	y	y	3.04	1.13	0.95	1.86	0.23	1.1	0.69	711.88
1010	李良庆	男	银屑病	8	52	55	1.58	22.03	15	n	132	y	n	n	n	5.9	2.58	1.15	4.23	0.52	1.31	1.21	711.74
1011	孙玉丽	女	银屑病	14	52	56	1.62	21.34	19	n	144	y	n	n	n	4.19	2.62	1.6	2.07	0.52	1.25	0.67	725.82
1012	王良财	男	寻常性银屑病	12	44	70	1.6	27.34	25	n	125	n	n	n	n	3.07	0.55	1.15	1.81	0.11	1.21	0.58	727
1013	任连全	男	红皮病性银屑病	9	59	72	1.6	28.13	30	n	109	n	n	n	n	5.27	0.83	1.52	3.58	0.17	1.1	0.94	732.6
1014	杜桂范	男	红皮病性银屑病	12	63	57	1.62	21.72	20	n	132	y	n	n	n	4.58	2.25	1.03	3.1	0.45	1.09	1	733.4
1015	翟锋	男	脓疱性银屑病	12	42	76	1.56	31.23	30	n	105	n	n	y	y	3.54	1.02	0.88	2.46	0.2	1.26	0.74	734.6
1016	张振山	男	寻常性银屑病	10	38	70	1.72	23.66	30	y	128	y	n	n	n	4.03	1.35	1.91	1.85	0.27	1.18	0.58	740.92
1017	顾秀玲	女	银屑病	10	75	60	1.63	22.58	4	n	136	y	n	n	n	2.83	1.01	0.64	1.99	0.2	1.15	0.69	743.21
1018	陈厚民	男	寻常性银屑病	12	52	78	1.73	26.06	0.6	n	150	y	n	n	y	5.38	1.73	1.11	3.92	0.35	1.01	1.14	749.21
1019	徐长河	男	银屑病	10	58	71	1.6	27.73	40	y	165	y	n	n	n	5.66	1.47	1.56	3.81	0.29	0.89	0.99	744.3
1020	张春香	女	脓疱性银屑病	8	40	67	1.65	24.61	1.5	n	146	y	y	n	n	4.77	3.26	0.91	3.21	0.65	1.62	1.06	759.32
1021	吕淑华	女	银屑病	18	76	73	1.68	25.86	0.2	n	143	y	n	n	n	4	1.66	0.96	2.71	0.33	0.89	0.97	761.2
1022	王尚敏	女	银屑病	8	66	53	1.6	20.7	0.1	n	112	n	n	y	n	4.52	0.84	1.25	3.1	0.17	1	0.94	771.55
1023	郝福军	男	银屑病	12	60	78	1.8	24.07	0.15	n	143	y	n	n	n	4.69	1.35	1.48	2.94	0.27	1.08	0.89	775.58
1024	杨金锁	男	银屑病	13	30	58	1.6	22.66	15	y	153	y	y	n	n	4.88	1.78	1.11	3.41	0.36	1.34	1.09	785.18
1025	李国芳	女	银屑病	13	63	63	1.64	23.42	20	n	109	n	n	y	y	4.54	1	1.21	3.13	0.2	1.09	0.93	787.3
1026	杨国臣	男	银屑病	17	66	70	1.61	27.01	0.5	n	124	n	n	y	y	4.15	0.8	1.08	2.91	0.16	1.14	0.81	791.87
1027	张盛兰	女	银屑病	15	87	84	1.78	26.51	0.5	n	113	n	n	y	n	6.04	2.18	1.47	4.13	0.44	0.76	1.14	793.2
1028	郑欣	女	银屑病	12	56	64	1.62	24.39	8	n	128	n	n	y	y	2.38	0.78	0.8	1.42	0.16	1.44	0.54	812.7
1029	常立娟	女	脓疱性银屑病	13	54	80	1.8	24.69	10	n	120	n	n	n	n	4.1	0.92	1.06	2.86	0.18	0.69	0.81	817.4
1030	沈江涛	男	银屑病	8	27	85	1.8	26.23	1	n	121	y	n	n	n	3.53	1.69	0.87	2.32	0.34	1.19	0.77	816.04
1031	卞青武	男	银屑病	15	50	82	1.82	24.76	5	n	109	n	n	n	n	3.43	2.63	0.69	2.21	0.53	1.08	0.76	828.3
1032	杨凤春	男	寻常性银屑病	13	47	75	1.66	27.22	0.01	n	140	y	n	n	n	4.01	1.27	1	2.76	0.25	0.89	0.92	822.7
1033	嵇芳	女	银屑病	12	60	70	1.73	23.39	20	n	120	n	n	y	y	5.74	1.61	1.15	4.27	0.32	1.01	1.4	827.2
1034	韩凤林	男	寻常性银屑病	12	60	72	1.68	25.51	20	n	106	n	n	y	y	5.66	1.67	1	4.33	0.33	1.25	1.26	835.77
1035	高桂娟	女	银屑病	10	39	69	1.59	27.29	10	n	122	n	n	n	n	4.66	1.12	1.28	3.16	0.22	0.88	1.11	837.7
1036	杜昕宇	男	银屑病	13	27	59	1.56	24.24	30	n	122	n	n	n	n	4.79	0.72	1.33	3.32	0.14	1.19	0.86	842.53
1037	于国利	男	银屑病	10	51	88	1.78	27.77	4	n	121	n	n	n	n	3.07	0.91	1.55	1.34	0.18	1.15	0.32	853.01
1038	钱秀珍	女	银屑病	13	77	55	1.68	19.49	0.02	n	122	n	n	n	n	3.02	0.8	1.32	1.54	0.16	1.05	0.36	858.8
1039	苏立东	男	银屑病	12	64	75	1.62	28.58	7	y	190	y	n	n	n	6.82	1.99	1.62	4.8	0.4	0.8	1.37	866.9
1040	董岳	女	银屑病	9	34	57	1.64	21.19	2	y	165	y	n	n	n	4.84	1.64	1.21	3.3	0.33	1.25	0.98	867.5
1041	康秀岭	男	银屑病	17	48	65	1.58	26.04	20	n	107	n	n	n	n	4.36	0.42	1.51	2.77	0.08	1.46	0.79	877.07
1042	付春和	男	寻常性银屑病	8	67	102	1.78	32.19	40	n	120	n	n	y	n	4.85	0.79	1.26	3.43	0.16	1.02	0.91	883.6
1043	王艳华	女	银屑病	12	65	55	1.58	22.03	1	n	111	n	n	n	n	4.61	0.9	1.21	3.22	0.18	1.08	0.89	890.6
1044	刘玉龙	男	寻常性银屑病	8	20	50	1.6	19.53	20	y	164	y	n	n	y	4.65	1.52	0.95	3.4	0.3	0.99	1.03	892.8
1045	何海燕	女	银屑病	12	56	70	1.65	25.71	30	n	120	n	n	n	n	5.83	2.13	1.26	4.14	0.43	1.08	1.3	901.2
1046	王祥力	男	寻常性银屑病	10	51	93	1.7	32.18	0.2	n	117	n	n	n	n	4.12	0.52	1.73	2.29	0.1	1.29	0.57	906.9
1047	杜亚春	男	脓疱性银屑病	20	56	74	1.58	29.64	0.2	n	126	n	n	n	n	5.93	2.88	1.25	4.1	0.58	0.95	1.13	912.48
1048	王亚珍	女	银屑病	12	51	59	1.61	22.76	30	n	126	n	n	y	n	2.53	2.08	0.89	1.22	0.42	0.79	0.4	915.5
1049	沃春英	男	寻常性银屑病	12	50	85	1.64	31.6	10	n	128	n	n	n	n	3.8	1.61	1.21	2.27	0.32	1.03	1	909.3
1050	王瑞琪	男	银屑病	8	22	58	1.6	22.66	0.1	n	130	y	n	n	n	5.13	1.39	1.75	3.1	0.28	0.85	0.8	924.2
1051	亓心志	男	寻常性银屑病	14	25	70	1.55	29.14	5	n	120	n	n	n	n	2.74	0.62	0.83	1.79	0.12	1.46	0.61	936.5
1052	张昊峰	男	寻常性银屑病	13	18	48	1.66	17.42	30	n	120	n	n	y	n	3.92	0.71	0.96	2.82	0.14	1.02	0.81	943.97
1053	衣卫军	男	银屑病	13	54	78	1.8	24.07	0.5	n	98	n	n	n	n	4.54	1.22	1.26	3.04	0.24	0.93	0.92	955.8
1054	江紫萱	女	银屑病	12	26	69	1.58	27.64	0.02	n	104	n	n	n	n	4.49	0.59	1.44	2.93	0.12	1.47	0.67	945.1
1055	常珍明	男	银屑病	8	34	73	1.62	27.82	1	n	130	y	n	n	n	3.57	1.32	1.11	2.2	0.26	1.2	0.7	930.1
1056	李新滨	男	银屑病	25	61	65	1.7	22.49	0.5	n	136	y	n	n	n	5.63	1.63	1.1	4.2	0.33	0.68	1.16	959.45
1057	郭鑫	男	脓疱性银屑病	30	40	102	1.82	30.79	20	n	121	n	n	y	n	4.78	1.91	1.11	3.29	0.38	0.62	0.8	959.8
1058	宋孟森	男	寻常性银屑病	18	58	72.5	1.73	24.22	10	n	172	y	n	n	n	2.86	0.89	0.77	1.91	0.18	0.96	0.65	971.7
1059	刘民金	男	寻常性银屑病	15	40	65	1.67	23.31	0.5	n	130	y	n	n	n	3.3	3.99	0.71	1.79	0.8	1.05	0.75	985
1060	李建平	男	银屑病	13	25	85	1.76	27.44	14	n	140	y	n	y	y	3.59	0.78	0.99	2.44	0.16	1.43	0.73	986.5
1061	李秀兰	女	银屑病	17	51	65	1.76	20.98	10	n	122	n	n	n	n	3.77	0.73	1.07	2.55	0.15	1.26	0.68	986.53
1062	栾秀娟	女	银屑病	10	47	55	1.62	20.96	15	n	110	n	n	y	n	3.11	1.15	0.71	2.17	0.23	0.94	0.72	1017.7
1063	翟亮	男	银屑病	5	31	60	1.6	23.44	0.1	n	120	n	n	n	n	4.25	0.84	0.96	3.12	0.17	0.93	0.85	998
1064	陈晓琳	女	寻常性银屑病	13	24	100	1.75	32.65	10	n	101	n	n	n	n	3.31	1.14	0.83	2.25	0.23	1.32	0.74	1056.3
1065	朱佳怡	女	银屑病	12	19	48	1.57	19.47	0.02	n	112	n	n	n	n	5.17	0.96	1.07	3.91	0.19	0.96	1.15	1026.9
1066	苏先伟	男	银屑病	10	48	75	1.72	25.35	0.5	n	109	n	n	n	n	4.94	1.43	1.22	3.43	0.29	1.07	0.99	1088.7
1067	李钦公	男	银屑病	13	70	75	1.64	27.89	7	n	125	n	n	n	n	4.64	0.88	1.27	3.19	0.18	1.03	0.87	1110.7
